# Supplementary material for: Transmembrane protein 135 regulates lipid homeostasis through its role in peroxisomal DHA metabolism
Source: PubMed Central journal article supplement (PMC9813353; doi:10.1038/s42003-022-04404-7), 2023-01-04
Supplement: 42003_2022_4404_MOESM2_ESM.pdf [file 42003_2022_4404_MOESM2_ESM.pdf]

**Supplemental Information For**  
**Transmembrane Protein 135 Regulates Lipid Homeostasis through**  
**its Role in Peroxisomal DHA Metabolism**

Michael Landowski<sup>1,2</sup>, Vijesh J. Bhute<sup>1,3</sup>, Samuel Grindel<sup>1</sup>, Zachary Haugstad<sup>1</sup>, Yeboah K.  
Gyening<sup>4,5</sup>, Madison Tytanic<sup>4</sup>, Richard S. Brush<sup>4</sup>, Lucas J. Moyer<sup>1</sup>, David W. Nelson<sup>6</sup>,  
Christopher R. Davis<sup>6</sup>, Chi-Liang Eric Yen<sup>6</sup>, Sakae Ikeda<sup>1,2</sup>, Martin-Paul Agbaga<sup>4,5</sup>,  
and Akihiro Ikeda<sup>1,2\*</sup>

\*Correspondence to: [aikeda@wisc.edu](mailto:aikeda@wisc.edu)

**This PDF file includes:**

Supplementary Figures 1-12  
Supplementary Tables 1-12

**a****Increased Lipids in *FUN025***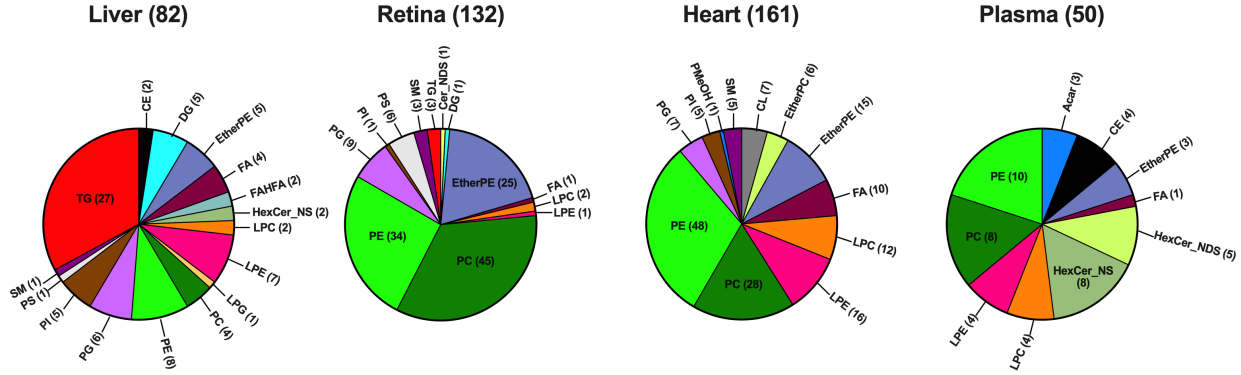**b****Decreased Lipids in *FUN025***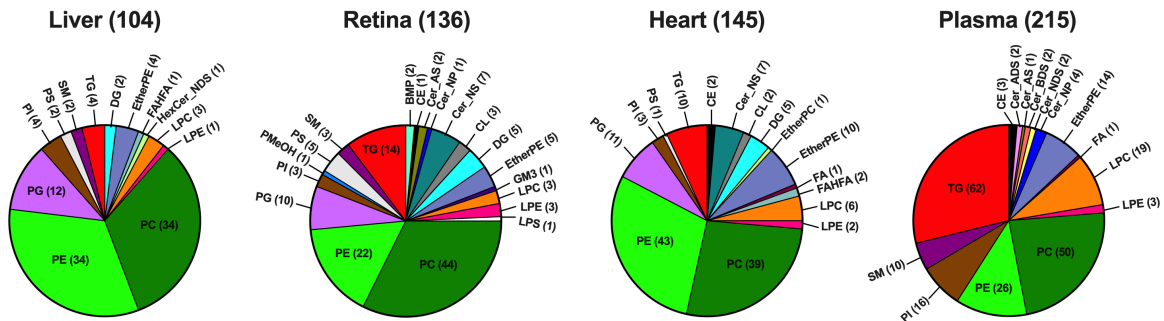

**Supplementary Figure 1: Lipid class changes in *Tmem135* mutant tissues.** Pie graphs of significantly (a) increased and (b) decreased lipids according to class in male *Tmem135*<sup>FUN025/FUN025</sup> (*FUN025*) livers, retinas, hearts, and plasmas compared to male WT controls. Numbers in brackets that are in bold font denote total number of lipids changed that reached statistical significance. Numbers in brackets next to lipid class denote total number of lipids changed within that class that reached statistical significance. Significance was determined by one-way ANOVA with post-hoc Tukey's HSD test between WT and *Tmem135*<sup>FUN025/FUN025</sup> livers (P<0.05). All altered lipid species can be found in **Supplementary Tables 6-9**. ACarn, Acylcarnitine; BMP, Bismonoacylglycerophosphate; CE, Cholesteryl ester; CerADS, Ceramide alpha-hydroxy fatty acid-dihydro-sphingosine; CerAS, Ceramide alpha-hydroxy fatty acid-sphingosine; CerBDS, Ceramide beta-hydroxy fatty acid-dihydro-sphingosine; CerNDS, Ceramide non-hydroxy fatty acid-dihydro-sphingosine; CerNP, Ceramide non-hydroxy fatty acid-phytosphingosine; CerNS, Ceramide non-hydroxy fatty acid-sphingosine; CL, Cardiolipin; DG, Diacylglycerol; EtherPC, Ether-linked phosphatidylcholine; EtherPE, Ether-linked phosphatidylethanolamine; FA, Free fatty acid; FAHFA, Fatty acid ester of hydroxyl fatty acid; GM3, Ganglioside; HexCerNDS, Hexosylceramide non-hydroxy fatty acid dihydro-sphingosine; HexCerNS, Hexosylceramide non-hydroxy fatty acid sphingosine; LPA, Lysophosphatidic acid; LPC, Lysophosphatidylcholine; LPE, Lysophosphatidylethanolamine; LPG, Lysophosphatidylglycerol; PC, Phosphatidylcholine; PE, Phosphatidylethanolamine; PG, Phosphatidylglycerol; PI, Phosphatidylinositol; PMeOH, Phosphatidylmethanol; PS, Phosphatidylserine; SM, Sphingomyelin; and TG, Triacylglycerol.

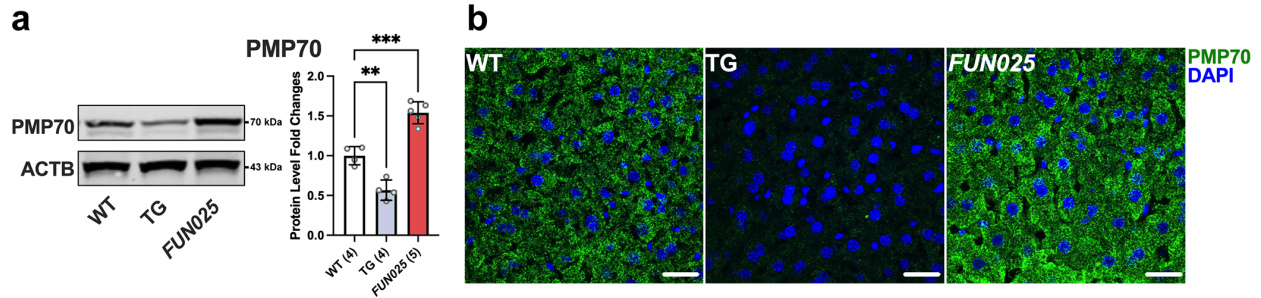

**Supplementary Figure 2: Peroxisomal membrane protein 70 (PMP70) levels in livers of *Tmem135* mice.** (a) Western blot analysis of PMP70 using livers from 2.5-month-old WT, *Tmem135* TG (TG), and *Tmem135*<sup>FUN025/FUN025</sup> (FUN025) mice. ACTB served as the loading control for this Western blot experiment. 4 WT (2 males/2 females), 4 *Tmem135* TG (2 males/2 females), and 5 *Tmem135*<sup>FUN025/FUN025</sup> (3 males/2 females) were used in this experiment. Asterisks \*\* and \*\*\* indicate post hoc Tukey test for a P<0.01 and P<0.001 significance following a significant difference detected by one-way ANOVA, respectively. The protein size next to the immunoblot images denote the size of the immunoband measured for this analysis. Dots represent individual data points. Data are presented as mean ± SD. (b) Representative 60X immunohistochemical images of PMP70 labeled (green) and DAPI stained (blue) WT, *Tmem135* TG, and *Tmem135*<sup>FUN025/FUN025</sup> livers. Scale bar for images = 30 microns.

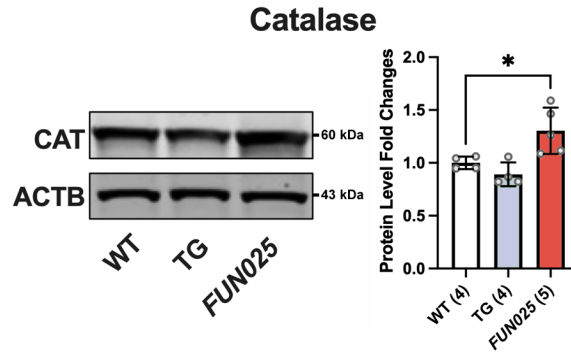

**Supplementary Figure 3: Catalase levels in livers of *Tmem135* mice.** Western blot analysis of catalase (CAT) using livers from 2.5-month-old WT, *Tmem135* TG (TG), and *Tmem135*<sup>FUN025/FUN025</sup> (*FUN025*) mice. ACTB served as the loading control for this western blot experiment. 4 WT (2 males/2 females), 4 *Tmem135* TG (2 males/2 females), and 5 *Tmem135*<sup>FUN025/FUN025</sup> (3 males/2 females) were used in this experiment. \* indicates post hoc Tukey test for a P<0.05 significance following a significant difference detected by one-way ANOVA. The protein size next to the immunoblot images denotes the size of the immunoband measured for this analysis. Dots represent individual data points. Data are presented as mean ± SD.

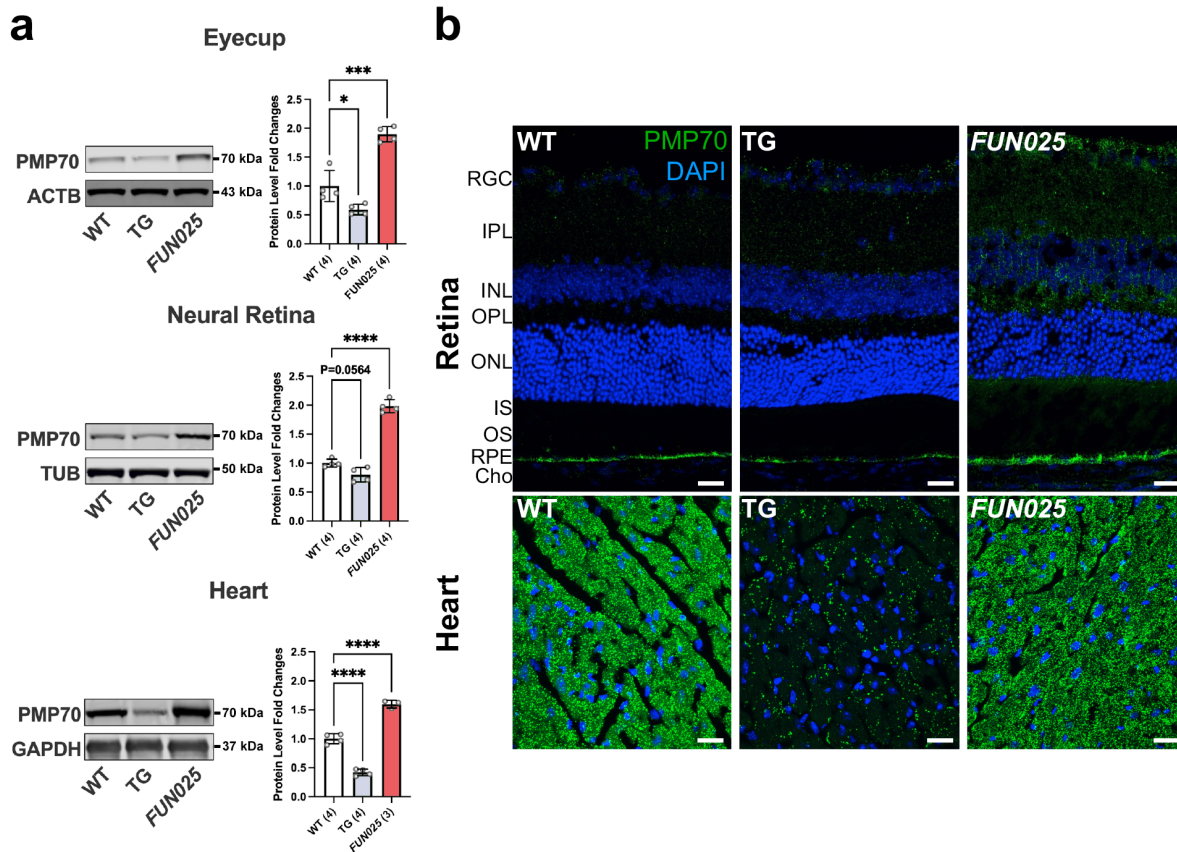

**Supplementary Figure 4: Peroxisome membrane protein 70 (PMP70) levels in retinas and hearts of *Tmem135* mice.** (a) Western blot analysis of PMP70 using eyecups, neural retinas, and heart from 2.5-month-old WT, *Tmem135* TG (TG), and *Tmem135*<sup>FUN025/FUN025</sup> (FUN025) mice. ACTB, TUB, and GAPDH served as the loading controls for these experiments. Asterisks (\*, \*\*\*, and \*\*\*\*) indicates a P<0.05, P<0.001 and P<0.0001 significance by post hoc Tukey test following a significant difference detected by one-way ANOVA. Number in parentheses represent the N of independent mouse samples per genotype used in the experiment. The protein size next to the immunoblot images denotes the size of the immunoband measured for this analysis. Dots represent individual data points. Data are presented as mean ± SD. (b) Representative immunohistochemical images of PMP70 labeled (green) and DAPI stained (blue) WT, *Tmem135* TG, and *Tmem135*<sup>FUN025/FUN025</sup> retina and heart sections. For retina images, the magnification is 40X and scale bar is 20 microns. For heart images, the magnification is 60X and scale bar is 10 microns. RGC, retinal ganglion cells. IPL, inner plexiform layer. INL, inner nuclear layer. OPL, outer plexiform layer. ONL, outer nuclear layer. IS, inner segments. OS, outer segments. RPE, retinal pigmented epithelium. Cho, choroid.

**a**

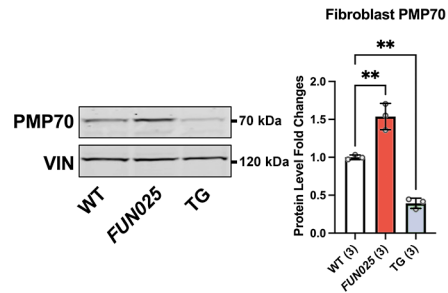

**b**

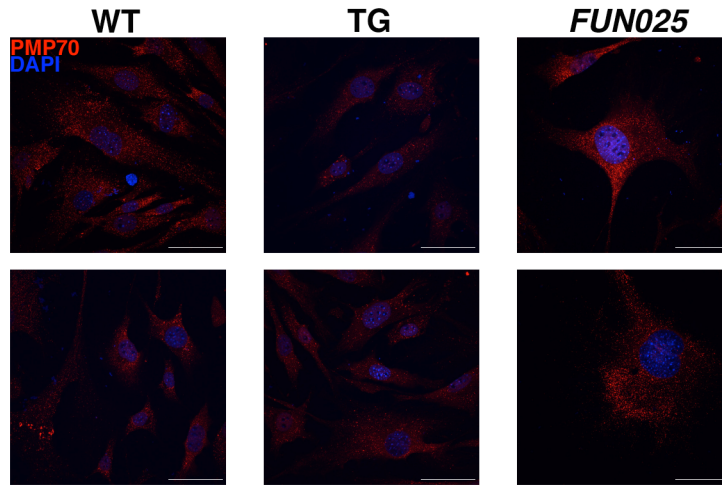

**Supplementary Figure 5: Peroxisome levels in fibroblasts of *Tmem135* mice.** (a) Western blot analysis of peroxisome membrane protein 70 (PMP70) using lysates derived from primary-cultured fibroblasts isolated from WT, *Tmem135* TG (TG), and *Tmem135*<sup>FUN025/FUN025</sup> (*FUN025*) mice. Vinculin (VIN) served as the loading control for this experiment. \*\* indicates a P<0.01 significance by post hoc Tukey test following a significant difference detected by one-way ANOVA. Number in parentheses represent the N of independent mouse samples per genotype used in the experiment. The protein size next to the immunoblot images denotes the size of the immunoband measured for this analysis. Dots represent individual data points. Data are presented as mean ± SD. (b) Representative immunohistochemical images of PMP70 labeled (red) and DAPI stained (blue) WT, *Tmem135* TG, and *Tmem135*<sup>FUN025/FUN025</sup> fibroblasts. Magnification is 60X and scale bar is 50 microns.

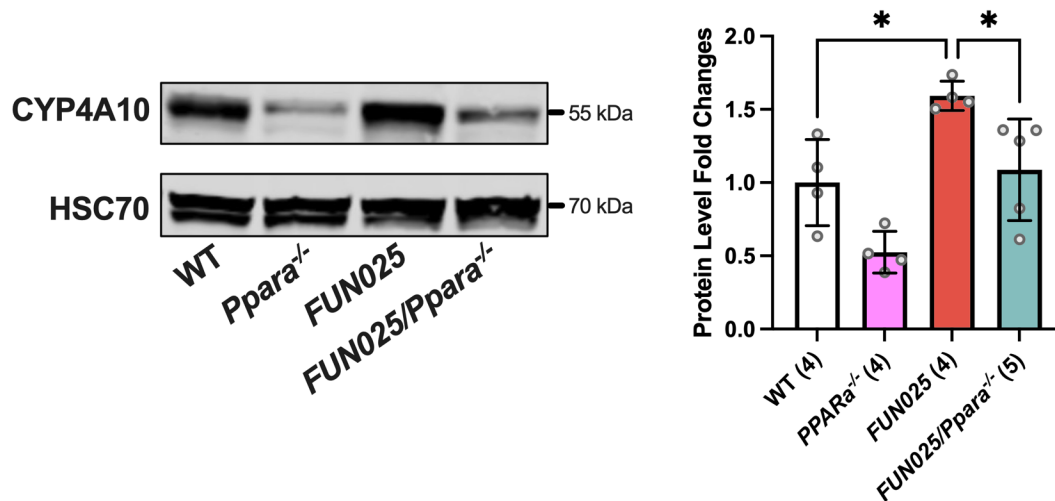

**Supplementary Figure 6: Cytochrome P450, family 4, subfamily a, polypeptide 10 (CYP4A10) Protein Levels.** Western blot analysis of CYP4A10 in the livers of 3-month-old WT (3 males/1 female), *Ppara*<sup>-/-</sup> (2 males /2 females), *Tmem135*<sup>FUN025/FUN025</sup> (2 males/2 females), and *Tmem135*<sup>FUN025/FUN025</sup>/*Ppara*<sup>-/-</sup> (3 males/2 females) mice. HSC70 served as the loading control for this experiment. \* indicates post hoc Tukey test for a P<0.05 significance following a significant difference detected by one-way ANOVA. Numbers in parentheses represent the number of samples used in the experiment. The protein size next to the immunoblot images denotes the size of the immunoband measured for this analysis. Dots represent individual data points. Data are presented as mean ± SD.

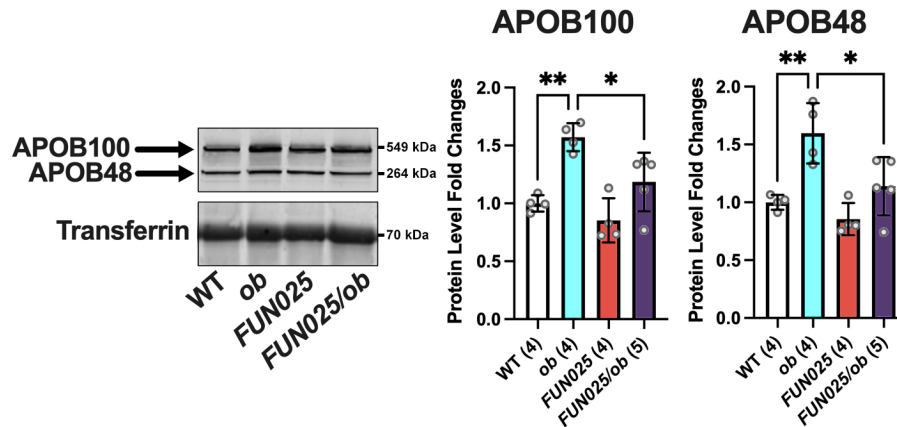

**Supplementary Figure 7: Plasma apolipoprotein B in female mice.** Western blot analysis of plasmas from 3-month-old WT, *Tmem135*<sup>FUN025/FUN025</sup> (*FUN025*), *Lep*<sup>ob/ob</sup> (*ob*), and *Tmem135*<sup>FUN025/FUN025</sup>/*Lep*<sup>ob/ob</sup> (*FUN025/ob*) female mice for apolipoprotein B100 (APOB100) and B48 (APOB48). Transferrin served as a loading control for this experiment. Number in parentheses represent the N of independent mouse samples per genotype used in the experiment. The protein size next to the immunoblot images denotes the size of the immunoband measured for this analysis. Dots represent individual data points. Asterisks (\* and \*\*) indicates a P<0.05 and P<0.01 significance by post hoc Tukey test following a significant difference detected by one-way ANOVA. Data are presented as mean ± SD.



**Increased Lipids in  
FUN025/ob Plasma (68)**

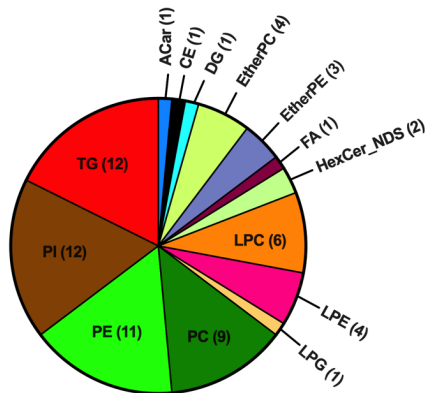

**Decreased Lipids in  
FUN025/ob Plasma (238)**

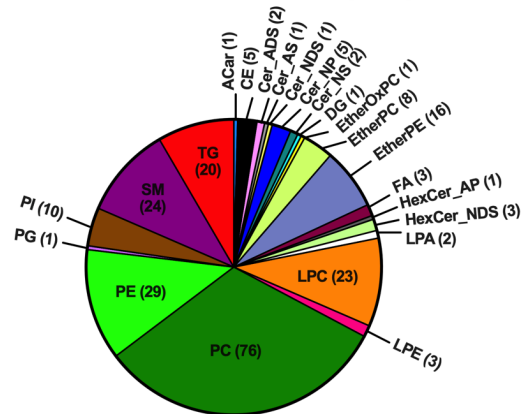

**Supplementary Figure 8: Lipid class changes in *Tmem135* TG tissues.** Pie graphs of significantly increased and decreased lipids according to class in male *Tmem135*<sup>FUN025/FUN025</sup>/*Leptin*<sup>ob/ob</sup> (*FUN025/ob*) plasmas compared to male *Leptin*<sup>ob/ob</sup> controls. Numbers in brackets that are in bold font denote total number of lipids changed that reached statistical significance. Numbers in brackets next to lipid class denote total number of lipids changed within that class that reached statistical significance. Significance was determined by Student's T-Test (P<0.05). ACar, Acylcarnitine; CE, Cholesteryl ester; CerADS, Ceramide alpha-hydroxy fatty acid-dihydro sphingosine; CerAS, Ceramide alpha-hydroxy fatty acid-sphingosine; CerNDS, Ceramide non-hydroxy fatty acid-dihydro sphingosine; CerNP, Ceramide non-hydroxy fatty acid-phyto sphingosine; CerNS, Ceramide non-hydroxy fatty acid-sphingosine; DG, Diacylglycerol; EtherOxPC, Ether-linked oxidized phosphatidylcholine; EtherPC, Ether-linked phosphatidylcholine; EtherPE, Ether-linked phosphatidylethanolamine; FA, Free fatty acid; HexCerAP, Hexosylceramide alpha-hydroxy fatty acid phytosphingosine; HexCerNDS, Hexosylceramide non-hydroxy fatty acid dihydro sphingosine; LPA, Lysophosphatidic acid; LPC, Lysophosphatidylcholine; LPE, Lysophosphatidylethanolamine; LPG, Lysophosphatidylglycerol; PC, Phosphatidylcholine; PE, Phosphatidylethanolamine; PG, Phosphatidylglycerol; PI, Phosphatidylinositol; SM, Sphingomyelin; and TG, Triacylglycerol.

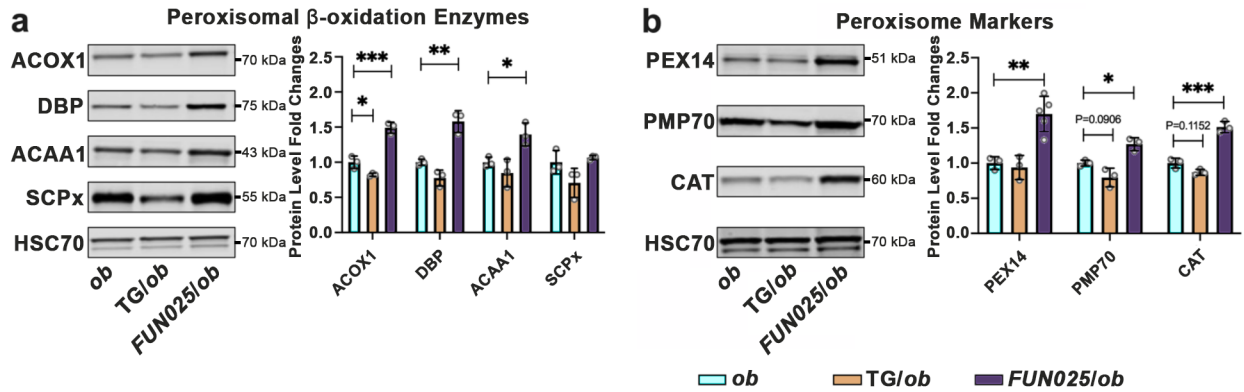

**Supplementary Figure 9: Hepatic peroxisomal beta-oxidation enzyme levels and peroxisome markers in female mice.** (a) Western blot analysis of peroxisomal beta-oxidation enzymes including Acyl-CoA Oxidase 1 (ACOX1), D-Bifunctional Protein (DBP), Acetyl-Coenzyme A Acyltransferase 1 (ACAA1), and Sterol Carrier Protein x (SCPx) using liver lysates from 3-month-old female *Lep<sup>ob/ob</sup>* (N=3), *Tmem135* TG/*Lep<sup>ob/ob</sup>* (TG/*ob*) (N=3) and *Tmem135<sup>FUN025/FUN025</sup>*/*Lep<sup>ob/ob</sup>* (N=3) mice. (d) Western blot analysis of peroxisome biogenesis factor 14 (PEX14), peroxisome membrane protein 70 (PMP70), and catalase (CAT) using livers from 3-month-old female *Lep<sup>ob/ob</sup>* (N=3), *Tmem135* TG/*Lep<sup>ob/ob</sup>* (N=3) and *Tmem135<sup>FUN025/FUN025</sup>*/*Lep<sup>ob/ob</sup>* (N=3) mice. For the PEX14 western, 5 female *Tmem135* TG/*Lep<sup>ob/ob</sup>* mice were used in this experiment. WT, *Tmem135* TG (TG), and *Tmem135<sup>FUN025/FUN025</sup>* mice. HSC70 served as the loading control for these experiments. Asterisks (\*, \*\*, and \*\*\*) indicates post hoc Tukey test for a P<0.05, P<0.01, and P<0.001 significance following a significant difference detected by one-way ANOVA. The protein size next to the immunoblot images denotes the size of the immunoband measured for this analysis. Dots represent individual data points. Data are presented as mean  $\pm$  SD.

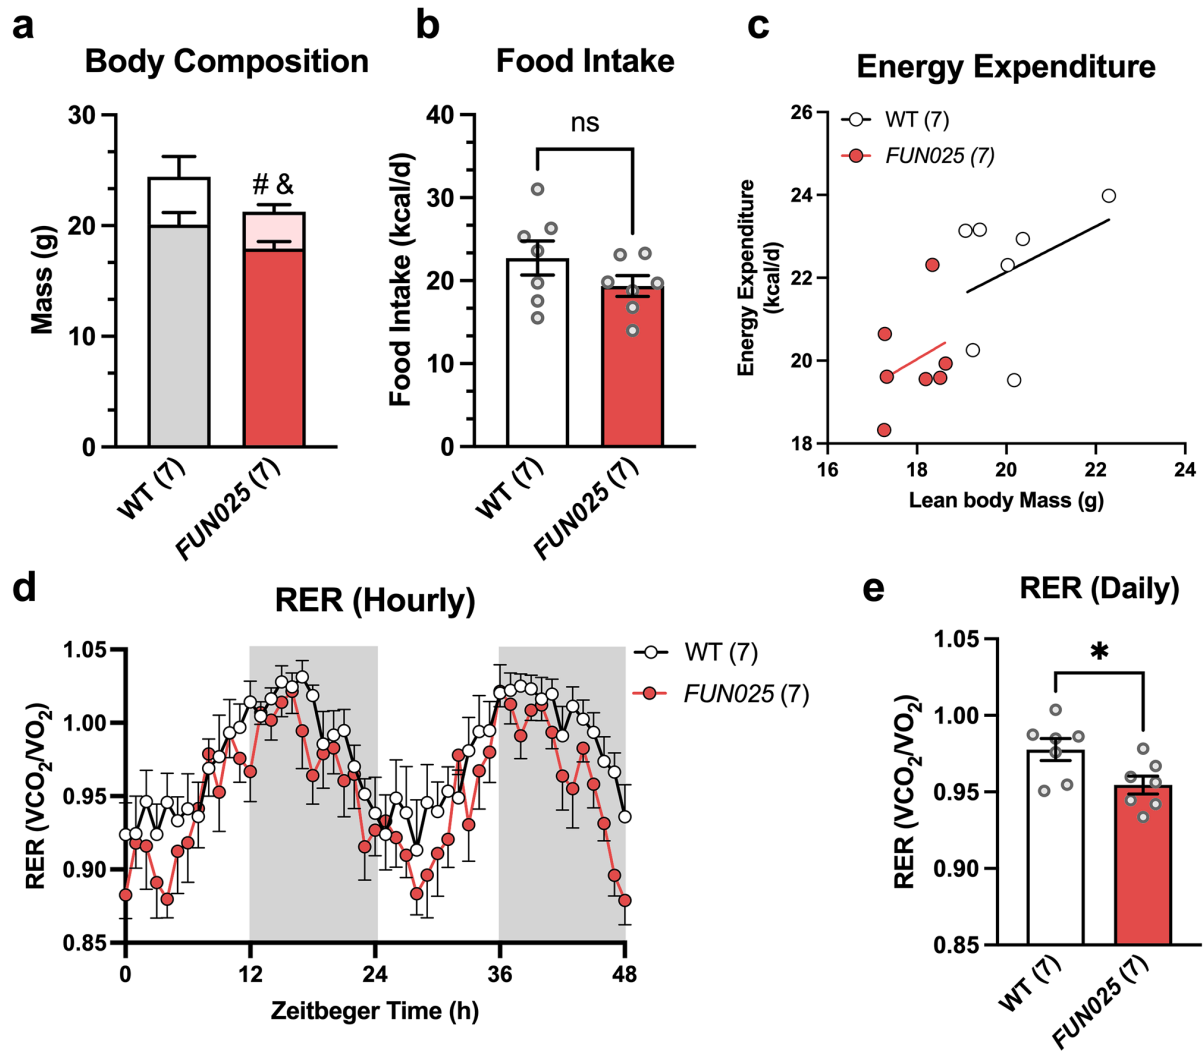

**Supplementary Figure 10: *Tmem135* mutation increases fatty acid oxidation in chow fed mice.** (a) Lean (dark bars) and fat (light bars) mass of 4-month-old male WT and *Tmem135*<sup>FUN025/FUN025</sup> (*FUN025*) mice measured by nuclear magnetic resonance (NMR) during 2 days of chow feeding. *Tmem135*<sup>FUN025/FUN025</sup> mice had significantly less total and lean mass after chow feeding than WT controls. Symbols (# and &) indicate a P<0.05 significance by Student's t-test between the lean and total mass of WT and *Tmem135*<sup>FUN025/FUN025</sup> mice, respectively. (b) Daily average of food intake per mouse during 2 days of chow feeding. Despite their smaller size, *Tmem135*<sup>FUN025/FUN025</sup> mice had similar intake of food intake compared to WT mice. (c) Linear regression of the daily average energy expenditure plotted against lean body mass of each WT and *Tmem135*<sup>FUN025/FUN025</sup> mouse. There were no significant differences in slopes or y-intercepts between WT and control *Tmem135*<sup>FUN025/FUN025</sup> mice (P=0.94 and 0.46, respectively). Thus, *Tmem135*<sup>FUN025/FUN025</sup> mice exhibited similar energy expenditure compared to WT control mice. (d) Hourly respiratory exchange ratio (RER) of WT and *Tmem135*<sup>FUN025/FUN025</sup> mice during 2 days of chow feeding. All mice preserved their circadian rhythm during metabolic phenotyping. Note the lower RER in the *Tmem135*<sup>FUN025/FUN025</sup> mice. Grey rectangles indicate the dark phase of the light cycle (7 P.M. to 7 A.M.). (e) Average daily RER of WT and *Tmem135*<sup>FUN025/FUN025</sup> mice during 2 days of chow feeding. *Tmem135*<sup>FUN025/FUN025</sup> mice had

lower average daily RER throughout the chow feeding experiment relative to WT controls. \* indicates a  $P < 0.05$  significance by Student's t-test between the average daily RER of WT and *Tmem135*<sup>FUN025/FUN025</sup> mice. Together, our study found a significant decrease in the average daily RER but no changes in the food intake and energy expenditure between WT and *Tmem135*<sup>FUN025/FUN025</sup> mice. These results show a shift toward increased fatty oxidation in both the light and dark phases due to the *Tmem135* mutation in mice. Number in parentheses represent the N of independent mice per genotype used in the experiment. Dots represent individual data points. Data are presented as mean  $\pm$  SD.

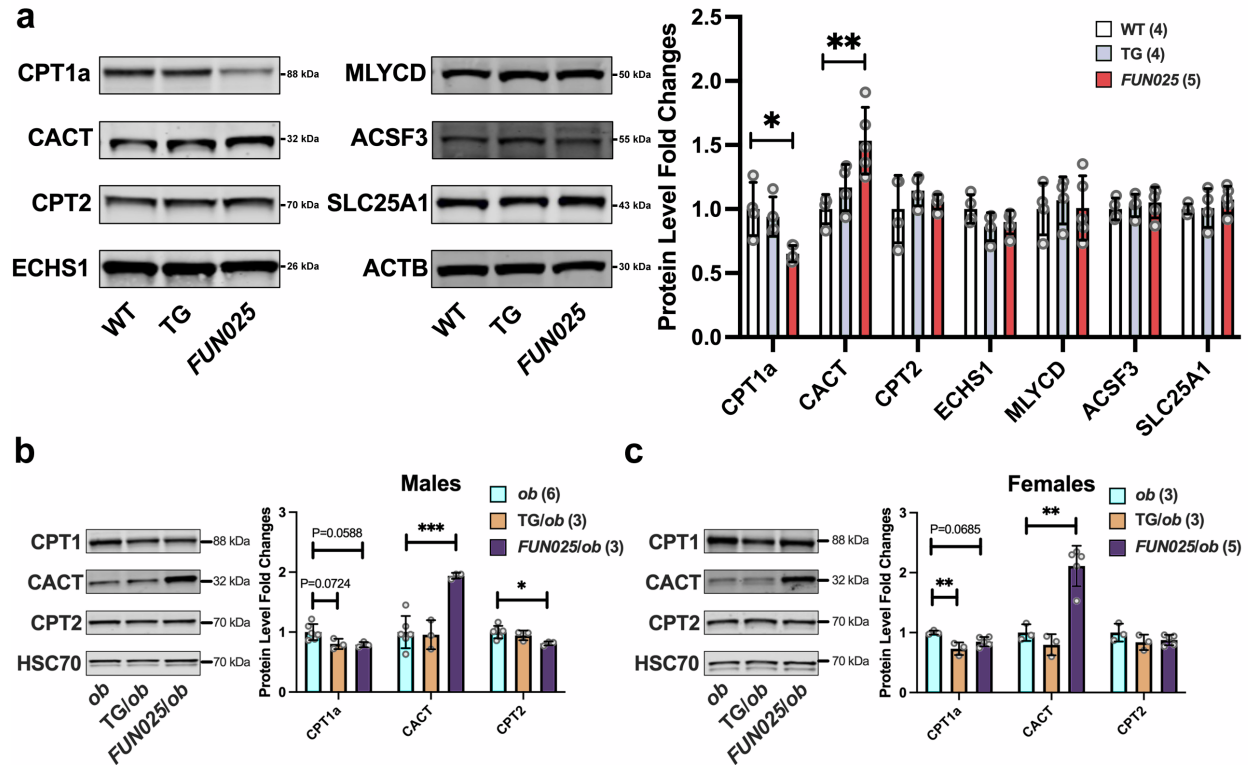

**Supplementary Figure 11: Expression of mitochondrial proteins, CPT1a and CACT, is affected by the *Tmem135* mutation in mice.** (a) Western blot analysis using 4 WT (2 males/2 females), 4 *Tmem135* TG (TG, 2 males/2 females), and 5 *Tmem135*<sup>FUN025/FUN025</sup> (*FUN025*, 3 males/2 females) mice was performed. ACTB served as the loading control for these experiments. CPT1A, carnitine palmitoyltransferase 1A. CACT, carnitine-acylcarnitine translocase. CPT2, carnitine palmitoyltransferase 2. ECHS1, enoyl-CoA hydratase, short chain 1. ACSF3, acyl-CoA synthetase family member 3. MLYCD, malonyl-CoA decarboxylase. SLC25A1, solute carrier family member 25 member 1. Western blot analysis of mitochondrial proteins CPT1a, CACT, and CPT2 in the livers of 3-month-old (b) male and (c) female *Lep*<sup>ob/ob</sup> (*ob*), *Tmem135* TG/*Lep*<sup>ob/ob</sup> (*TG/ob*) and *Tmem135*<sup>FUN025/FUN025</sup>/*Lep*<sup>ob/ob</sup> (*FUN025/ob*) mice. HSC70 served as the loading control for these experiments. Number in parentheses represent the N of independent mouse samples per genotype used in the experiment. Asterisks (\*, \*\*, and \*\*\*) indicates a P<0.05, P<0.01, and P<0.001 significance by post hoc Tukey test following a significant difference detected by one-way ANOVA. The protein size next to the immunoblot images denotes the size of the immunoband measured for this analysis. Dots represent individual data points. Data are presented as mean ± SD.

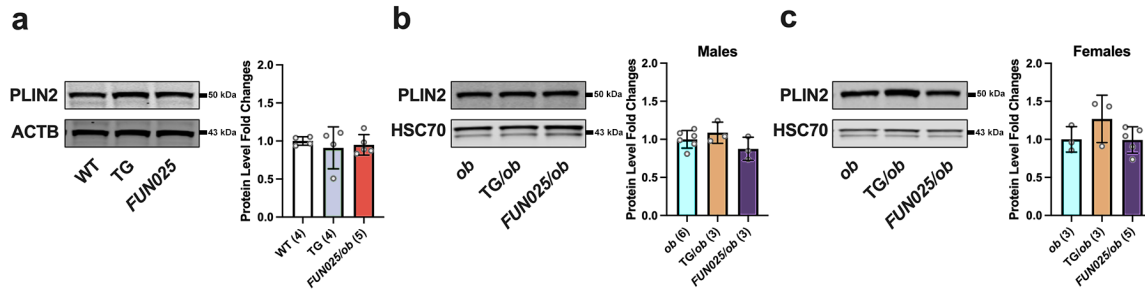

**Supplementary Figure 12: Perilipin 2 (PLIN2) protein levels in *Tmem135* livers.** (a) Western blot analysis of PLIN2 in 2.5-month-old liver lysates of WT, *Tmem135* TG (TG), and *Tmem135*<sup>FUN025/FUN025</sup> (*FUN025*) mice. ACTB served as the loading control for this experiment. 4 WT (2 males/2 females), 4 *Tmem135* TG (2 males/2 females), and 5 *Tmem135*<sup>FUN025/FUN025</sup> (3 males/2 females) were used in this experiment. (b,c) Western blot analysis of PLIN2 in the livers of 3-month-old male and female *Lep*<sup>ob/ob</sup> (*ob*), *Tmem135* TG/*Lep*<sup>ob/ob</sup> (TG/*ob*), and *Tmem135*<sup>FUN025/FUN025</sup>/*Lep*<sup>ob/ob</sup> (*FUN025/ob*) mice. There were no significant changes in PLIN2 was observed in the experimental genotypes compared to their controls. Number in parentheses represent the N of independent mouse samples per genotype used in the experiment. The protein size next to the immunoblot images denote the size of the immunoband measured for this analysis. Dots represent individual data points. HSC70 served as the loading control for these experiments. Data are presented as mean ± SD.

**Supplementary Table 1: Summary of Lipid Class Changes in *Tmem135*<sup>FUN025/FUN025</sup> (*FUN025*) Compared to WT.**

| Lipid Class | Liver          |        |      | Retina         |        |      | Heart          |        |      | Plasmas        |        |      |
|-------------|----------------|--------|------|----------------|--------|------|----------------|--------|------|----------------|--------|------|
|             | Total Detected | FUN025 |      | Total Detected | FUN025 |      | Total Detected | FUN025 |      | Total Detected | FUN025 |      |
|             |                | UP     | DOWN |                | UP     | DOWN |                | UP     | DOWN |                | UP     | DOWN |
| ACar        |                |        |      |                |        |      | 1              | 0      | 0    | 6              | 3      | 0    |
| BMP         |                |        |      | 2              | 0      | 2    |                |        |      |                |        |      |
| CE          | 2              | 2      | 0    | 2              | 0      | 1    | 2              | 0      | 2    | 11             | 4      | 3    |
| Cer_ADS     |                |        |      | 2              | 0      | 0    |                |        |      | 4              | 0      | 2    |
| Cer_AP      |                |        |      | 1              | 0      | 0    |                |        |      | 5              | 0      | 0    |
| Cer_AS      | 2              | 0      | 0    | 4              | 0      | 2    |                |        |      | 4              | 0      | 1    |
| Cer_BDS     |                |        |      | 1              | 0      | 0    |                |        |      | 3              | 0      | 2    |
| Cer_NDS     | 2              | 0      | 0    | 9              | 1      | 0    |                |        |      | 5              | 0      | 2    |
| Cer_NP      | 7              | 0      | 0    | 6              | 0      | 1    |                |        |      | 8              | 0      | 4    |
| Cer_NS      | 15             | 0      | 0    | 30             | 0      | 7    | 40             | 0      | 7    | 11             | 0      | 0    |
| CL          | 12             | 0      | 0    | 12             | 0      | 3    | 18             | 7      | 2    |                |        |      |
| DG          | 17             | 5      | 2    | 14             | 1      | 5    | 9              | 0      | 5    | 1              | 0      | 0    |
| EtherOxPC   |                |        |      | 1              | 0      | 0    |                |        |      |                |        |      |
| EtherPC     | 7              | 0      | 0    | 8              | 0      | 0    | 29             | 6      | 1    | 5              | 0      | 0    |
| EtherPE     | 19             | 5      | 4    | 51             | 25     | 5    | 49             | 15     | 10   | 33             | 3      | 14   |
| FA          | 9              | 4      | 0    | 11             | 1      | 0    | 31             | 10     | 1    | 23             | 1      | 1    |
| FAHFA       | 7              | 2      | 1    | 5              | 0      | 0    | 8              | 0      | 2    | 4              | 0      | 0    |
| GM3         |                |        |      | 6              | 0      | 1    | 4              | 0      | 0    |                |        |      |
| HBMP        |                |        |      |                |        |      | 6              | 0      | 0    |                |        |      |
| Hex_AP      |                |        |      |                |        |      |                |        |      | 1              | 0      | 0    |
| HexCer_NDS  | 5              | 0      | 1    | 22             | 0      | 0    |                |        |      | 7              | 5      | 0    |
| HexCer_NS   | 8              | 2      | 0    | 19             | 0      | 0    | 8              | 0      | 0    | 12             | 8      | 0    |
| LPA         |                |        |      |                |        |      |                |        |      | 2              | 0      | 0    |
| LPC         | 20             | 2      | 3    | 10             | 2      | 3    | 25             | 12     | 6    | 39             | 4      | 19   |

|         |     |    |     |     |     |     |     |     |     |     |    |     |
|---------|-----|----|-----|-----|-----|-----|-----|-----|-----|-----|----|-----|
| LPE     | 14  | 7  | 1   | 10  | 1   | 3   | 24  | 16  | 2   | 18  | 4  | 3   |
| LPG     | 2   | 1  | 0   |     |     |     | 5   | 0   | 0   | 2   | 0  | 0   |
| LPI     | 1   | 0  | 0   | 1   | 0   | 0   | 3   | 0   | 0   |     |    |     |
| LPS     |     |    |     | 1   | 0   | 1   |     |     |     |     |    |     |
| OxPI    |     |    |     |     |     |     |     |     |     | 1   | 0  | 0   |
| PA      |     |    |     | 3   | 0   | 0   |     |     |     |     |    |     |
| PC      | 137 | 4  | 34  | 175 | 45  | 44  | 140 | 28  | 39  | 128 | 8  | 50  |
| PE      | 99  | 8  | 34  | 111 | 34  | 22  | 141 | 48  | 43  | 67  | 10 | 26  |
| PEtOH   | 7   | 0  | 0   | 1   | 0   | 0   |     |     |     |     |    |     |
| PG      | 32  | 6  | 12  | 32  | 9   | 10  | 45  | 7   | 11  | 3   | 0  | 0   |
| PI      | 26  | 5  | 4   | 15  | 1   | 3   | 17  | 5   | 3   | 32  | 0  | 16  |
| PMeOH   | 3   | 0  | 0   | 4   | 0   | 1   | 1   | 1   | 0   |     |    |     |
| PS      | 12  | 1  | 2   | 18  | 6   | 5   | 3   | 0   | 1   |     |    |     |
| SHexCer |     |    |     | 1   | 0   | 0   |     |     |     | 1   | 0  | 0   |
| SM      | 19  | 1  | 2   | 31  | 3   | 3   | 26  | 5   | 0   | 21  | 0  | 10  |
| SQDG    |     |    |     |     |     |     |     |     |     | 1   | 0  | 0   |
| TG      | 86  | 27 | 4   | 88  | 3   | 14  | 79  | 0   | 10  | 105 | 0  | 62  |
| Total   | 570 | 82 | 104 | 707 | 132 | 136 | 714 | 161 | 145 | 563 | 50 | 215 |

Numbers denote number of lipid species within class that were detected. Grey indicates no detection of any lipid species within the lipid class in the tissue.



**Supplementary Table 2: Summary of Acyl Side Chain Changes in *Tmem135*<sup>FUN025/FUN025</sup> (*FUN025*) Tissues Compared to WT.**

| Acyl Side Chain | Liver          |        |      | Retina         |        |      | Heart          |        |      | Plasmas        |        |      |
|-----------------|----------------|--------|------|----------------|--------|------|----------------|--------|------|----------------|--------|------|
|                 | Total Detected | FUN025 |      | Total Detected | FUN025 |      | Total Detected | FUN025 |      | Total Detected | FUN025 |      |
|                 |                | UP     | DOWN |                | UP     | DOWN |                | UP     | DOWN |                | UP     | DOWN |
| C2              |                |        |      | 1              | 0      | 1    |                |        |      | 1              | 0      | 0    |
| C12:0           |                |        |      |                |        |      | 3              | 0      | 0    |                |        |      |
| C13:0           | 1              | 0      | 0    |                |        |      |                |        |      |                |        |      |
| C14:0           | 12             | 2      | 2    | 13             | 6      | 0    | 14             | 2      | 2    | 7              | 1      | 0    |
| C14:1           | 2              | 1      | 0    | 2              | 0      | 1    |                |        |      | 2              | 0      | 0    |
| C14:2           |                |        |      |                |        |      | 1              | 0      | 0    |                |        |      |
| C15:0           | 9              | 0      | 3    | 12             | 2      | 1    | 9              | 3      | 1    | 12             | 0      | 6    |
| C15:1           |                |        |      | 0              | 0      | 0    | 0              | 0      | 0    | 1              | 0      | 0    |
| C16:0           | 93             | 26     | 9    | 119            | 20     | 20   | 85             | 21     | 8    | 95             | 7      | 30   |
| C16:1           | 31             | 13     | 3    | 25             | 7      | 2    | 25             | 12     | 1    | 28             | 6      | 4    |
| C16:2           |                |        |      |                |        |      | 3              | 2      | 0    |                |        |      |
| C16:3           |                |        |      | 2              | 1      | 0    |                |        |      |                |        |      |
| C17:0           | 16             | 0      | 6    | 9              | 0      | 1    | 18             | 4      | 3    | 19             | 0      | 7    |
| C17:1           | 9              | 2      | 0    | 5              | 0      | 0    | 10             | 4      | 1    | 13             | 0      | 5    |
| C17:2           | 1              | 0      | 0    |                |        |      |                |        |      |                |        |      |
| C18:0           | 68             | 7      | 14   | 96             | 16     | 17   | 72             | 18     | 15   | 66             | 6      | 22   |
| C18:1           | 100            | 25     | 3    | 91             | 12     | 13   | 95             | 22     | 12   | 92             | 16     | 36   |
| C18:2           | 91             | 20     | 10   | 59             | 21     | 7    | 133            | 58     | 13   | 89             | 6      | 39   |
| C18:3           | 9              | 2      | 1    | 5              | 4      | 0    | 8              | 4      | 2    | 11             | 2      | 4    |
| C18:4           |                |        |      | 1              | 0      | 1    |                |        |      | 1              | 0      | 0    |
| C18:5           |                |        |      |                |        |      |                |        |      | 2              | 0      | 0    |
| C19:0           | 14             | 0      | 2    | 7              | 1      | 1    | 29             | 7      | 6    | 17             | 0      | 11   |
| C19:1           | 4              | 0      | 0    | 4              | 0      | 0    | 5              | 1      | 0    | 6              | 0      | 2    |
| C19:2           | 2              | 0      | 0    | 1              | 0      | 0    |                |        |      |                |        |      |

|       |    |    |    |    |    |    |    |    |    |    |   |    |
|-------|----|----|----|----|----|----|----|----|----|----|---|----|
| C20:0 | 21 | 1  | 4  | 18 | 0  | 5  | 26 | 6  | 5  | 19 | 3 | 6  |
| C20:1 | 14 | 3  | 3  | 11 | 2  | 1  | 28 | 5  | 5  | 13 | 0 | 7  |
| C20:2 | 7  | 0  | 0  | 9  | 1  | 0  | 12 | 1  | 2  | 8  | 1 | 1  |
| C20:3 | 29 | 11 | 2  | 29 | 9  | 2  | 31 | 9  | 5  | 29 | 7 | 3  |
| C20:4 | 77 | 0  | 23 | 61 | 6  | 9  | 73 | 15 | 19 | 69 | 2 | 43 |
| C20:5 | 3  | 0  | 1  | 6  | 0  | 3  | 2  | 0  | 0  | 7  | 0 | 2  |
| C21:0 |    |    |    | 1  | 0  | 0  | 8  | 2  | 0  | 4  | 1 | 0  |
| C21:1 | 1  | 0  | 0  |    |    |    |    |    |    | 1  | 0 | 0  |
| C21:2 |    |    |    |    |    |    |    |    |    | 1  | 0 | 0  |
| C22:0 | 10 | 1  | 1  | 6  | 0  | 2  | 7  | 0  | 0  | 12 | 0 | 4  |
| C22:1 | 2  | 0  | 0  | 4  | 0  | 0  | 6  | 0  | 0  | 8  | 0 | 2  |
| C22:2 |    |    |    | 1  | 0  | 1  | 1  | 0  | 0  | 3  | 0 | 1  |
| C22:3 |    |    |    | 5  | 2  | 0  | 5  | 2  | 0  | 1  | 0 | 0  |
| C22:4 | 9  | 0  | 3  | 25 | 10 | 1  | 22 | 2  | 7  | 9  | 0 | 4  |
| C22:5 | 23 | 1  | 15 | 31 | 8  | 14 | 54 | 2  | 36 | 25 | 0 | 14 |
| C22:6 | 39 | 1  | 27 | 96 | 6  | 60 | 70 | 2  | 48 | 39 | 0 | 34 |
| C22:7 |    |    |    | 1  | 0  | 1  |    |    |    |    |   |    |
| C23:0 | 3  | 0  | 0  | 3  | 0  | 1  | 3  | 0  | 0  | 6  | 0 | 3  |
| C23:1 | 2  | 0  | 0  | 1  | 0  | 0  |    |    |    |    |   |    |
| C24:0 | 5  | 0  | 0  | 10 | 1  | 0  | 7  | 1  | 0  | 4  | 0 | 1  |
| C24:1 | 4  | 0  | 1  | 6  | 0  | 1  | 5  | 0  | 0  | 5  | 1 | 0  |
| C24:2 |    |    |    | 1  | 0  | 0  | 1  | 0  | 0  | 1  | 0 | 0  |
| C24:4 | 1  | 0  | 0  | 8  | 4  | 1  |    |    |    |    |   |    |
| C25:0 |    |    |    |    |    |    | 1  | 0  | 0  | 1  | 0 | 0  |
| C25:3 | 1  | 0  | 0  |    |    |    |    |    |    |    |   |    |
| C26:0 |    |    |    | 3  | 2  | 0  | 1  | 0  | 1  | 1  | 0 | 0  |
| C26:1 |    |    |    | 2  | 2  | 0  |    |    |    | 1  | 0 | 0  |
| C26:2 |    |    |    | 3  | 3  | 0  |    |    |    | 1  | 0 | 0  |

|                       |    |   |   |    |    |   |    |    |    |    |   |    |
|-----------------------|----|---|---|----|----|---|----|----|----|----|---|----|
| C26:4                 |    |   |   | 6  | 3  | 2 |    |    |    |    |   |    |
| C27:0                 |    |   |   | 1  | 0  | 0 |    |    |    |    |   |    |
| C28:2                 |    |   |   | 1  | 0  | 0 |    |    |    |    |   |    |
| Ether Bond-Containing | 26 | 5 | 4 | 60 | 26 | 4 | 78 | 21 | 11 | 38 | 3 | 14 |

Numbers denote number of lipid species that contain acyl side chain that were detected. Grey indicates no detection of any lipids containing acyl side chain within the tissue.

**Supplementary Table 3: Relative Mole Percentages of Fatty Acids in WT and *Tmem135*<sup>FUN025/FUN025</sup> (*FUN025*) Tissues.**

| Fatty Acid | Liver            |                             |                         | Retina           |                             |                         | Heart            |                             |                         | Plasma           |                             |                         |
|------------|------------------|-----------------------------|-------------------------|------------------|-----------------------------|-------------------------|------------------|-----------------------------|-------------------------|------------------|-----------------------------|-------------------------|
|            | WT (Avg ± StDev) | <i>FUN025</i> (Avg ± StDev) | Significance by T-test? | WT (Avg ± StDev) | <i>FUN025</i> (Avg ± StDev) | Significance by T-test? | WT (Avg ± StDev) | <i>FUN025</i> (Avg ± StDev) | Significance by T-test? | WT (Avg ± StDev) | <i>FUN025</i> (Avg ± StDev) | Significance by T-test? |
| 14:0       | 0.272 ± 0.034    | 0.416 ± 0.079               | *                       | ND               | ND                          |                         | ND               | ND                          |                         | ND               | ND                          |                         |
| 16:0       | 23.140 ± 1.250   | 24.288 ± 4.487              | ns                      | 27.119 ± 1.439   | 26.928 ± 0.374              | ns                      | 16.942 ± 0.898   | 15.477 ± 1.205              | ns                      | 24.021 ± 1.235   | 25.120 ± 3.851              | ns                      |
| 16:1       | 2.470 ± 0.197    | 4.313 ± 0.677               | **                      | 0.896 ± 0.154    | 2.870 ± 0.283               | ****                    | 0.750 ± 0.098    | 2.361 ± 0.304               | ****                    | 2.341 ± 0.401    | 4.417 ± 0.384               | ***                     |
| 18:0       | 11.280 ± 0.804   | 10.791 ± 0.411              | ns                      | 21.999 ± 0.041   | 20.743 ± 0.384              | ***                     | 18.715 ± 0.965   | 14.202 ± 0.879              | ***                     | 9.609 ± 1.583    | 10.135 ± 1.920              | ns                      |
| 18:1       | 16.796 ± 3.088   | 27.069 ± 7.133              | *                       | 9.916 ± 0.525    | 14.538 ± 1.300              | ***                     | 11.172 ± 1.165   | 17.304 ± 0.779              | ***                     | 12.758 ± 1.281   | 22.092 ± 3.546              | **                      |
| 18:2n6     | 21.862 ± 2.458   | 18.062 ± 1.585              | *                       | 2.161 ± 0.372    | 5.076 ± 0.319               | ****                    | 17.523 ± 1.660   | 34.785 ± 1.401              | ****                    | 29.010 ± 2.484   | 27.788 ± 2.2023             | ns                      |
| 18:3n6     | 0.376 ± 0.072    | 0.428 ± 0.032               | ns                      | ND               | ND                          |                         | ND               | ND                          |                         | 0.434 ± 0.106    | 0.604 ± 0.064               | *                       |
| 18:3n3     | 0.537 ± 0.087    | 0.145 ± 0.025               | ***                     | ND               | ND                          |                         | ND               | ND                          |                         | 0.186 ± 0.050    | 0.141 ± 0.046               | ns                      |
| 20:0       | 0.200 ± 0.092    | 0.123 ± 0.091               | ns                      | 0.685 ± 0.044    | 0.729 ± 0.031               | ns                      | 0.503 ± 0.038    | 0.315 ± 0.048               | ***                     | 0.197 ± 0.073    | 0.149 ± 0.070               | ns                      |
| 20:1       | 0.479 ± 0.115    | 0.593 ± 0.059               | ns                      | 0.226 ± 0.022    | 0.497 ± 0.038               | ****                    | 0.573 ± 0.130    | 0.447 ± 0.068               | ns                      | 0.510 ± 0.185    | 0.484 ± 0.074               | ns                      |
| 20:3n9     | 0.384 ± 0.041    | 0.224 ± 0.010               | ***                     | ND               | ND                          |                         | 0.463 ± 0.009    | 0.195 ± 0.009               | ****                    | 0.279 ± 0.030    | 0.222 ± 0.014               | **                      |
| 20:5n3     | 0.192 ± 0.036    | 0.119 ± 0.011               | *                       | 0.129 ± 0.011    | 0.059 ± 0.005               | ***                     | ND               | ND                          |                         | 0.282 ± 0.060    | 0.110 ± 0.006               | **                      |
| 20:2n6     | 0.328 ± 0.026    | 0.484 ± 0.071               | **                      | 0.198 ± 0.035    | 0.281 ± 0.014               | **                      | 0.125 ± 0.017    | 0.238 ± 0.013               | ****                    | ND               | ND                          |                         |
| 20:3n6     | 1.126 ± 0.172    | 2.204 ± 0.536               | **                      | 0.622 ± 0.062    | 1.810 ± 0.242               | ****                    | 0.828 ± 0.122    | 1.161 ± 0.140               | *                       | 1.0182 ± 0.099   | 2.013 ± 0.128               | ****                    |
| 20:4n6     | 11.966 ± 0.316   | 8.580 ± 0.985               | ***                     | 8.019 ± 0.512    | 11.095 ± 0.356              | ****                    | 8.720 ± 0.757    | 11.496 ± 1.244              | **                      | 13.299 ± 2.147   | 4.928 ± 0.807               | ***                     |
| 22:0       | 0.450 ± 0.127    | 0.328 ± 0.119               | ns                      | 0.618 ± 0.022    | 0.668 ± 0.036               | ns                      | 0.441 ± 0.015    | 0.381 ± 0.007               | ***                     | 0.373 ± 0.079    | 0.297 ± 0.053               | ns                      |
| 22:1       | 0.432 ± 0.016    | 0.573 ± 0.054               | **                      | 0.684 ± 0.214    | 0.776 ± 0.330               | ns                      | ND               | ND                          |                         | 0.447 ± 0.035    | 0.583 ± 0.056               | **                      |
| 22:4n6     | 0.339 ± 0.039    | 0.179 ± 0.025               | ***                     | 1.050 ± 0.041    | 2.786 ± 0.128               | ****                    | 0.716 ± 0.046    | 0.453 ± 0.015               | ****                    | 0.160 ± 0.014    | 0.072 ± 0.005               | ****                    |
| 22:5n6     | 0.465 ± 0.029    | 0.140 ± 0.007               | ****                    | 0.327 ± 0.045    | 0.560 ± 0.063               | **                      | 2.646 ± 0.307    | 0.273 ± 0.013               | ****                    | 0.341 ± 0.021    | 0.089 ± 0.017               | ****                    |
| 22:5n3     | 0.334 ± 0.087    | 0.103 ± 0.020               | **                      | 0.453 ± 0.105    | 0.905 ± 0.079               | ***                     | 0.917 ± 0.188    | 0.269 ± 0.015               | ***                     | 0.233 ± 0.050    | 0.073 ± 0.009               | ***                     |
| 22:6n3     | 5.938 ± 0.144    | 0.206 ± 0.018               | ****                    | 24.781 ± 1.510   | 9.600 ± 0.780               | ****                    | 18.642 ± 0.734   | 0.367 ± 0.026               | ****                    | 3.884 ± 0.403    | 0.103 ± 0.014               | ****                    |
| 24:0       | 0.301 ± 0.059    | 0.287 ± 0.066               | ns                      | 0.118 ± 0.064    | 0.078 ± 0.021               | ns                      | 0.162 ± 0.011    | 0.127 ± 0.010               | **                      | 0.186 ± 0.029    | 0.158 ± 0.007               | ns                      |
| 24:1       | 0.332 ± 0.044    | 0.343 ± 0.023               | ns                      | ND               | ND                          |                         | 0.161 ± 0.005    | 0.150 ± 0.005               | ns                      | 0.431 ± 0.079    | 0.421 ± 0.130               | ns                      |
| n6/n3      | 5.207 ± 0.254    | 52.426 ± 2.892              | ****                    | 0.489 ± 0.025    | 2.053 ± 0.127               | ****                    | 1.564 ± 0.148    | 76.269 ± 3.994              | ****                    | 9.676 ± 0.576    | 83.469 ± 5.292              | ****                    |

ND, not detected. ns, not significant.

**Supplementary Table 4: Summary of Lipid Class Changes in Male *Tmem135/Leptin* Mutant (FUN025/*ob*) Mice Compared to *Leptin* mutant (*ob*) Mice.**

| Lipid Class | Plasmas        |        |      |
|-------------|----------------|--------|------|
|             | Total Detected | FUN025 |      |
|             |                | UP     | DOWN |
| ACar        | 8              | 1      | 1    |
| CE          | 11             | 1      | 5    |
| Cer_ADS     | 5              | 0      | 2    |
| Cer_AP      | 3              | 0      | 0    |
| Cer_AS      | 4              | 0      | 1    |
| Cer_BDS     | 1              | 0      | 0    |
| Cer_NDS     | 5              | 0      | 1    |
| Cer_NP      | 9              | 0      | 5    |
| Cer_NS      | 11             | 0      | 2    |
| DG          | 4              | 1      | 1    |
| EtherOxPC   | 2              | 0      | 1    |
| EtherPC     | 18             | 4      | 8    |
| EtherPE     | 32             | 3      | 16   |
| FA          | 13             | 1      | 3    |
| FAHFA       | 5              | 0      | 0    |
| HexCer_AP   | 2              | 0      | 1    |
| HexCer_NDS  | 14             | 2      | 3    |
| HexCer_NS   | 2              | 0      | 0    |
| LPA         | 2              | 0      | 2    |
| LPC         | 49             | 6      | 23   |
| LPE         | 15             | 4      | 3    |
| LPG         | 1              | 1      | 0    |
| LPI         | 2              | 0      | 0    |

| OxPI  | 1   | 0  | 0   |
|-------|-----|----|-----|
| PC    | 118 | 9  | 76  |
| PE    | 61  | 11 | 29  |
| PG    | 4   | 0  | 1   |
| PI    | 30  | 12 | 10  |
| SM    | 30  | 0  | 24  |
| TG    | 82  | 12 | 20  |
| Total | 544 | 68 | 238 |

Numbers denote number of lipid species within class.

**Supplementary Table 5: Summary of Acyl Side Chain Changes in Male *Tmem135/Leptin* Mutant (FUN025/*ob*) Mice Compared to *Leptin* mutant (*ob*) Mice.**

| Acyl Side Chain | Plasmas        |        |      |
|-----------------|----------------|--------|------|
|                 | Total Detected | FUN025 |      |
|                 |                | UP     | DOWN |
| C8              | 1              | 0      | 1    |
| C12:0           | 1              | 0      | 0    |
| C14:0           | 8              | 1      | 4    |
| C14:1           | 1              | 1      | 0    |
| C14:3           | 1              | 0      | 1    |
| C15:0           | 10             | 0      | 6    |
| C15:1           | 1              | 0      | 1    |
| C16:0           | 84             | 19     | 25   |
| C16:1           | 25             | 8      | 6    |
| C16:2           | 1              | 0      | 1    |
| C17:0           | 14             | 0      | 6    |
| C17:1           | 12             | 0      | 3    |
| C18:0           | 69             | 15     | 27   |
| C18:1           | 91             | 21     | 20   |
| C18:2           | 83             | 11     | 22   |
| C18:3           | 9              | 3      | 3    |
| C19:0           | 7              | 1      | 1    |
| C19:1           | 3              | 0      | 1    |
| C20:0           | 10             | 2      | 4    |
| C20:1           | 18             | 3      | 8    |
| C20:2           | 10             | 3      | 4    |
| C20:3           | 42             | 10     | 9    |
| C20:4           | 61             | 0      | 49   |

|                       |    |   |    |
|-----------------------|----|---|----|
| C20:5                 | 7  | 0 | 6  |
| C21:0                 | 1  | 0 | 1  |
| C22:0                 | 8  | 0 | 2  |
| C22:1                 | 4  | 0 | 2  |
| C22:3                 | 2  | 1 | 0  |
| C22:4                 | 9  | 0 | 4  |
| C22:5                 | 0  | 0 | 16 |
| C22:6                 | 37 | 0 | 36 |
| C23:0                 | 3  | 0 | 2  |
| C24:0                 | 5  | 0 | 0  |
| C24:1                 | 6  | 0 | 3  |
| C26:0                 | 2  | 0 | 2  |
| C26:1                 | 1  | 0 | 0  |
| C26:2                 | 2  | 0 | 1  |
| C28:2                 | 1  | 0 | 1  |
| Ether Bond-Containing | 52 | 7 | 25 |

Numbers denote number of lipid species within class.



**Supplementary Table 6: Significantly-Altered Lipids in *Tmem135*<sup>FUN025/FUN025</sup> (*FUN025*) Livers Compared to WT.**

| Lipid Species      | Normalized Log10 Lipid Concentrations |         |         |         |          |          |          |          | Contains DHA |
|--------------------|---------------------------------------|---------|---------|---------|----------|----------|----------|----------|--------------|
|                    | WT 1                                  | WT 2    | WT 3    | WT 4    | FUN025 1 | FUN025 2 | FUN025 3 | FUN025 4 |              |
| CE 18:1            | -0.2407                               | 0.1055  | 0.1021  | -0.4466 | 0.7132   | 0.3345   | 0.2407   | 0.5859   |              |
| CE 18:2            | -0.0272                               | 0.2904  | -0.5617 | -0.5082 | 0.8953   | 0.1164   | 0.3098   | 0.6858   |              |
| DG 16:0_16:1       | 0.0222                                | -0.0135 | 0.0702  | -0.1075 | 0.8663   | 0.0860   | 0.5268   | 0.6037   |              |
| DG 16:0_18:1       | 0.0425                                | 0.0668  | 0.0232  | -0.3717 | 0.9682   | 0.1188   | 0.5393   | 0.5878   |              |
| DG 16:0_18:2       | -0.0017                               | 0.1713  | 0.1410  | -0.5616 | 0.8609   | 0.0824   | 0.5503   | 0.6757   |              |
| DG 16:0_22:6       | 0.4891                                | 0.6989  | 0.4422  | 0.4029  | -0.5650  | -1.2858  | -0.9452  | -1.1554  | x            |
| DG 16:1_18:2       | -0.0992                               | 0.2970  | 0.2457  | -0.4073 | 0.8923   | 0.1313   | 0.7027   | 0.7108   |              |
| DG 18:1_18:1       | -0.0303                               | 0.0250  | 0.0563  | -0.5381 | 0.9906   | 0.2510   | 0.7135   | 0.5608   |              |
| DG 18:2_22:5       | 0.2023                                | 0.1780  | 0.0374  | -0.1834 | -0.4908  | -0.9905  | -0.8352  | -0.5556  |              |
| EtherPE 14:1e_20:4 | 0.4048                                | 0.4720  | 0.3482  | 0.3199  | -1.1381  | -1.2914  | -1.3109  | -0.2445  |              |
| EtherPE 16:1e_18:1 | -0.3638                               | -0.0297 | -0.1647 | -0.2263 | 0.9649   | 0.6966   | 0.6345   | 0.7135   |              |
| EtherPE 16:1e_18:2 | -0.3354                               | -0.2458 | -0.3805 | -0.3699 | 1.0656   | 0.7850   | 0.7463   | 0.8436   |              |
| EtherPE 16:1e_20:1 | -0.2250                               | 0.2141  | -0.1160 | -0.0945 | 0.8541   | 0.3651   | 0.5037   | 0.4879   |              |
| EtherPE 16:1e_20:3 | -0.6912                               | 0.1538  | -0.1795 | -0.1190 | 1.1196   | 0.8697   | 0.8039   | 0.9076   |              |
| EtherPE 18:1e_18:2 | -0.1671                               | 0.0716  | -0.2073 | -0.1156 | 0.7936   | 0.6422   | 0.4910   | 0.2169   |              |
| EtherPE 18:1e_20:4 | 0.1840                                | 0.5510  | 0.1877  | 0.1660  | -0.2206  | -0.6248  | -0.7139  | -0.4197  |              |
| EtherPE 18:1e_22:4 | 0.4232                                | 0.8026  | 0.0849  | 0.2171  | -0.0107  | -0.3621  | -0.3461  | -0.1018  |              |
| EtherPE 18:2e_22:5 | 0.1830                                | -0.4352 | -0.1624 | -0.1644 | -0.9400  | -1.1484  | -0.5884  | -0.6977  |              |
| FA 16:0_1          | -1.0056                               | -0.9591 | -0.3182 | -0.7360 | 0.9491   | 0.5652   | 0.6078   | 0.7688   |              |
| FA 16:1            | -0.2117                               | 0.1541  | 0.1517  | -0.2295 | 0.9945   | 0.4291   | 0.7446   | 0.8315   |              |
| FA 18:1            | -0.1495                               | 0.0961  | 0.0043  | -0.3672 | 0.8588   | 0.2750   | 0.3957   | 0.6288   |              |
| FA 18:2            | -0.1893                               | 0.2406  | 0.0281  | -0.5438 | 0.8087   | 0.1787   | 0.2878   | 0.6240   |              |
| FAHFA 16:1_18:3    | 0.0279                                | 0.3346  | 0.4585  | 0.1437  | 1.0535   | 0.7337   | 1.0105   | 1.0017   |              |
| FAHFA 18:1_20:3    | -0.1440                               | 0.0738  | -0.0060 | -0.3880 | 0.9164   | 0.2981   | 0.3983   | 0.6695   |              |
| FAHFA 22:4_18:2    | 0.2901                                | 0.7415  | 0.0654  | 0.0963  | 0.0031   | -0.6261  | -0.5720  | -0.4025  |              |

|                      |         |         |         |         |         |         |         |         |   |
|----------------------|---------|---------|---------|---------|---------|---------|---------|---------|---|
| HexCer_NDS d40:1     | -0.2111 | 0.2050  | -0.2522 | -0.3593 | 0.8040  | 0.3762  | 0.1763  | 0.3361  |   |
| HexCer_NS d18:1_20:0 | -0.1811 | -0.5131 | -0.0458 | -0.3490 | 0.9173  | 0.3666  | 0.3592  | 0.4432  |   |
| HexCer_NS d18:1_22:0 | -0.2134 | 0.2029  | -0.2544 | -0.3654 | 0.8020  | 0.3741  | 0.1863  | 0.3340  |   |
| LPC 0:0/20:4         | 0.5281  | 0.6244  | 0.2442  | 0.6641  | 0.0984  | -0.4541 | -0.5018 | -0.3086 |   |
| LPC 0:0/22:6         | 0.6644  | 0.7069  | 0.4911  | 0.7456  | -0.8091 | -0.9799 | -1.8442 | -0.8888 | x |
| LPC 16:0/0:0         | 0.0216  | 0.0684  | -0.2517 | -0.0697 | 0.9183  | 0.2387  | 0.1168  | 0.4696  |   |
| LPC 18:2/0:0         | 0.0173  | 0.0673  | -0.2325 | -0.1936 | 0.9631  | 0.3793  | 0.1544  | 0.6156  |   |
| LPC 22:5/0:0         | 0.6971  | 0.7217  | 0.4723  | 0.8823  | -0.8263 | -0.9960 | -1.0176 | 0.2135  |   |
| LPE 16:0             | -0.3360 | -0.2840 | -0.3658 | -0.2721 | 1.0510  | 0.3802  | 0.4930  | 0.8179  |   |
| LPE 16:0_1           | -0.3337 | -0.2818 | -0.3634 | -0.2698 | 1.0587  | 0.3653  | 0.4901  | 0.8198  |   |
| LPE 16:1             | -0.3512 | -0.0579 | -0.0647 | -0.0342 | 1.0057  | 0.4251  | 0.6068  | 0.8939  |   |
| LPE 16:1_1           | -0.3512 | -0.0579 | -0.0647 | -0.0342 | 1.0057  | 0.4251  | 0.6068  | 0.8939  |   |
| LPE 18:0             | -0.4117 | -0.1344 | -0.3038 | -0.3337 | 1.0305  | 0.2652  | 0.2745  | 0.7127  |   |
| LPE 18:0_1           | 0.3145  | 0.4660  | 0.3726  | 0.3739  | -1.4530 | -1.6386 | 0.7042  | -1.2791 |   |
| LPE 18:1             | -0.2270 | -0.3527 | -0.2670 | -0.2234 | 1.0246  | 0.4104  | 0.5208  | 0.8036  |   |
| LPE 20:1             | -0.5201 | -0.1817 | -0.4804 | -0.2457 | 0.7420  | 0.1368  | 0.0793  | 0.6023  |   |
| LPG 16:0             | -0.0931 | -0.1717 | -0.1857 | -0.3450 | 0.9267  | 0.1970  | 0.2098  | 0.7668  |   |
| PC 14:0_20:4         | -0.0288 | 0.4998  | 0.1888  | 0.1042  | 0.1236  | -0.5604 | -0.7537 | -0.6220 |   |
| PC 15:0_18:2         | 0.1112  | 0.6354  | -0.0414 | 0.1129  | -0.2653 | -0.8099 | -0.5973 | -0.4480 |   |
| PC 16:0_17:1         | -0.3912 | -0.3550 | -0.4820 | -0.5112 | 0.6667  | 0.8866  | 1.0544  | 1.2360  |   |
| PC 16:0_20:3         | -0.3752 | 0.0133  | -0.4573 | -0.3684 | 0.8400  | 0.2188  | 0.3118  | 0.5120  |   |
| PC 16:0_20:4         | 0.3556  | 0.7436  | 0.2445  | 0.2631  | -0.3762 | -0.8558 | -0.9446 | -0.6499 |   |
| PC 16:0_20:5         | -0.0126 | 0.6939  | 0.5769  | 0.1108  | -0.9298 | -1.0842 | -1.1039 | -0.9731 |   |
| PC 16:0_22:6         | 0.6009  | 0.8306  | 0.4930  | 0.4623  | -1.1345 | -1.3072 | -1.3640 | -1.2022 | x |
| PC 16:1_20:4         | 0.4130  | 0.7428  | 0.3675  | 0.1460  | 0.0524  | -0.3774 | -0.6834 | -0.1259 |   |
| PC 16:1_22:6         | 0.6953  | 0.8612  | 0.6911  | 0.4532  | -0.9338 | -0.8257 | -1.5748 | -1.1213 | x |
| PC 17:0_18:2         | 0.4119  | 0.8658  | 0.6674  | 0.4100  | -1.0769 | -1.2374 | 0.4342  | -1.1220 |   |
| PC 17:0_20:4         | 0.6004  | -0.1809 | 0.4139  | 0.2424  | -0.5381 | -0.9823 | -0.4137 | -0.8398 |   |

|              |         |         |         |         |         |         |         |         |   |
|--------------|---------|---------|---------|---------|---------|---------|---------|---------|---|
| PC 18:0_20:3 | -0.2677 | 0.6822  | 0.5910  | -0.0034 | -1.5488 | -0.5487 | -1.2622 | -0.2223 |   |
| PC 18:0_20:4 | 0.3515  | 0.8483  | 0.1849  | 0.2921  | -0.1465 | -0.7119 | -0.8432 | -0.5417 |   |
| PC 18:0_22:5 | 0.5841  | 0.4510  | 0.5847  | 0.0123  | -1.0730 | -1.2367 | -0.2571 | -1.1189 |   |
| PC 18:0_22:6 | -0.2956 | -0.5400 | -1.0138 | -0.2190 | 0.6718  | 0.6855  | 0.6500  | 0.8277  | x |
| PC 18:1_20:4 | 0.4646  | 0.7244  | 0.3531  | 0.2877  | -0.4528 | -0.7914 | -0.9017 | -0.6734 |   |
| PC 18:2_22:5 | 0.4277  | 0.4865  | 0.3020  | 0.1115  | -0.2826 | -0.6505 | -0.7864 | -0.3459 |   |
| PC 20:0_22:6 | 0.6113  | 0.6681  | 0.3385  | -0.1459 | -0.8139 | -1.0285 | -1.8785 | -0.6586 | x |
| PC 20:1_22:6 | 0.5026  | 0.5893  | 0.2439  | 0.2629  | -0.4915 | -0.8010 | -0.8446 | -0.8379 | x |
| PC 31:0      | -0.1315 | -0.4135 | -0.4571 | -0.3803 | 0.9280  | 0.3221  | 0.4607  | 0.7386  |   |
| PC 34:0      | 0.1789  | 0.6690  | 0.2276  | 0.1888  | -0.1209 | -0.6229 | -0.7660 | -0.1602 |   |
| PC 36:5      | 0.2991  | 0.5181  | 0.0215  | -0.1926 | -0.3899 | -0.7523 | -0.6711 | -0.3927 |   |
| PC 36:6      | 0.5843  | 0.8439  | 0.5263  | 0.4332  | -1.4268 | -1.5482 | -1.5637 | -0.7189 |   |
| PC 37:5      | 0.5415  | 0.9049  | 0.4509  | 0.0818  | -0.6119 | -0.6567 | -1.3200 | -0.8121 |   |
| PC 37:6      | 0.5665  | 0.6104  | 0.3870  | 0.2631  | -0.8938 | -1.0872 | -1.6942 | -0.0551 |   |
| PC 38:5      | -0.1039 | 0.0470  | -0.4001 | -0.4112 | -0.8360 | -0.8291 | -0.6887 | -0.3845 |   |
| PC 39:4      | 0.3106  | 0.5349  | 0.1373  | 0.2560  | -0.7418 | -0.7819 | -0.9180 | -0.6853 |   |
| PC 39:6      | 0.5832  | 0.6859  | 0.3354  | 0.3336  | -0.3251 | -1.6624 | -0.7006 | -0.7091 |   |
| PC 39:7      | 0.6608  | 0.7209  | 0.4801  | 0.4967  | -0.4789 | -1.7548 | -1.0001 | -1.6641 |   |
| PC 40:4      | 0.4903  | 0.5055  | 0.1101  | 0.3352  | -0.4370 | -0.7590 | -1.2639 | -0.5004 |   |
| PC 40:5      | 0.3412  | 0.7016  | 0.1595  | 0.2779  | -0.3040 | -0.7433 | -0.8029 | -0.4699 |   |
| PC 40:5_1    | -0.1642 | 0.2254  | -0.2509 | -0.0952 | -0.4819 | -0.7648 | -0.8545 | -0.8774 |   |
| PC 40:6      | 0.5364  | 0.7701  | 0.3618  | 0.4705  | -1.0152 | -1.1729 | -1.1014 | -1.2536 |   |
| PC 40:6_1    | -0.0824 | -0.0962 | -0.3116 | -0.4016 | -0.6600 | -0.9138 | -0.6592 | -0.6354 |   |
| PC 40:6_2    | 0.3890  | 0.4060  | 0.9604  | -0.0213 | -1.1174 | -1.4055 | -0.3734 | -1.3829 |   |
| PC 40:7      | 0.5534  | 0.7728  | 0.4836  | 0.4382  | -0.9865 | -1.4264 | -1.1662 | -1.0733 |   |
| PC 40:8      | 0.5202  | 0.6816  | 0.3155  | 0.3335  | -0.6818 | -1.1237 | -1.0259 | -0.8438 |   |
| PC 42:10     | 0.5359  | 0.7184  | 0.4569  | 0.3351  | -0.8522 | -1.0200 | -1.0414 | -0.8993 |   |
| PE 14:0_22:6 | 0.4792  | 0.5948  | 0.3518  | 0.6013  | -0.6252 | -1.6137 | -1.6314 | -0.4742 | x |

|                |         |         |         |         |         |         |         |         |   |
|----------------|---------|---------|---------|---------|---------|---------|---------|---------|---|
| PE 15:0_20:4   | 0.3656  | 0.3598  | 0.0226  | 0.0785  | -0.1181 | -0.5236 | -1.3370 | -0.2391 |   |
| PE 15:0_22:6   | 0.5914  | 0.6880  | 0.3637  | 0.5442  | -0.7208 | -1.4244 | -1.6552 | -0.9118 | x |
| PE 16:0_18:1   | -0.0938 | -0.2218 | -0.3116 | 0.0191  | 0.8380  | 0.2721  | 0.3143  | 0.5351  |   |
| PE 16:0_18:2   | -0.3637 | -0.3070 | -0.5247 | -0.3642 | 0.9130  | 0.3558  | 0.5681  | 0.8934  |   |
| PE 16:0_20:3   | -0.2122 | 0.0429  | -0.2698 | -0.3682 | 0.7463  | 0.2972  | 0.3173  | 0.5606  |   |
| PE 16:0_22:5   | -0.2038 | 0.0177  | -0.2327 | -0.0236 | -0.6105 | -0.8764 | -0.9206 | -0.6329 |   |
| PE 16:0_22:6   | 0.4652  | 0.6260  | 0.3950  | 0.4217  | -0.8809 | -1.2338 | -1.1579 | -0.9437 | x |
| PE 16:1_18:2   | -0.1752 | -0.0598 | -0.3039 | -0.1481 | 0.8569  | 0.3085  | 0.4469  | 0.7907  |   |
| PE 16:1_22:6   | 0.4818  | 0.7563  | 0.5149  | 0.5441  | -1.2086 | -0.9282 | -0.7987 | -1.1698 | x |
| PE 17:0_20:4   | 0.3490  | 0.3361  | -0.0135 | 0.1860  | -0.3257 | -0.8609 | -0.7470 | -0.2802 |   |
| PE 17:0_20:4_1 | 0.2461  | 0.4975  | 0.1752  | 0.1895  | -1.0176 | -0.2733 | -0.7955 | -0.5597 |   |
| PE 17:0_22:6   | 0.4714  | 0.3396  | 0.3102  | 0.3331  | -0.6603 | -0.4152 | -1.7840 | -1.2247 | x |
| PE 17:1_18:2   | -0.0823 | -0.0527 | -0.3891 | -0.1475 | 0.7304  | 0.0719  | 0.1651  | 0.7258  |   |
| PE 17:1_22:6   | 0.7985  | 0.6133  | 0.4790  | 0.4782  | -1.1903 | -1.1227 | -0.6846 | -0.4342 | x |
| PE 18:0_18:2   | -0.1643 | -0.0916 | -0.5899 | -0.3914 | 0.7708  | 0.1272  | 0.2556  | 0.6983  |   |
| PE 18:0_20:1   | 0.0123  | 0.3096  | -0.1685 | -0.0532 | -0.1592 | -0.6147 | -0.7854 | -0.3181 |   |
| PE 18:0_20:3_1 | -0.5930 | -0.3706 | -0.4621 | -0.2653 | 0.7415  | 0.0875  | 0.1929  | 0.1329  |   |
| PE 18:0_20:4_2 | 0.0376  | 0.5934  | 0.1471  | 0.1369  | -0.3243 | -0.5539 | -0.7726 | -0.2512 |   |
| PE 18:0_22:4_1 | 0.2446  | -0.1540 | 0.0997  | -0.0177 | -0.3349 | -0.6957 | -0.6908 | -0.2729 |   |
| PE 18:0_22:5   | -0.0032 | 0.2192  | -0.0351 | -0.0266 | -0.7546 | -1.1576 | -1.1033 | -0.9709 |   |
| PE 18:0_22:5_1 | -0.0745 | 0.4349  | 0.7227  | -0.3539 | -1.0459 | -1.1786 | -1.1955 | -1.0831 |   |
| PE 18:0_22:6   | 0.5122  | 0.6661  | 0.3560  | 0.4354  | -1.0166 | -1.2531 | -1.1792 | -1.0233 | x |
| PE 18:1_18:2   | -0.1479 | -0.6503 | -0.1830 | -0.4942 | 0.7795  | 0.2366  | 0.3316  | 0.8870  |   |
| PE 18:1_22:6   | 0.4714  | 0.6296  | 0.4056  | 0.3929  | -0.8665 | -1.1669 | -1.1829 | -0.9021 | x |
| PE 18:2_22:6   | 0.3412  | 0.4955  | 0.2346  | 0.1966  | -0.5156 | -0.9987 | -0.9504 | -0.6191 | x |
| PE 19:0_20:4   | 0.3728  | 0.3345  | -0.0635 | 0.0759  | -0.6136 | -0.7790 | -0.9603 | -0.5212 |   |
| PE 19:0_20:4_1 | 0.4251  | 0.3706  | 0.1905  | 0.2078  | -0.7658 | -1.3992 | -0.9673 | -0.6458 |   |
| PE 20:0_20:4   | 0.3054  | 0.1054  | -0.1142 | -0.0318 | -0.3195 | -0.7179 | -0.7732 | -0.1265 |   |

|                |         |         |         |         |         |         |         |         |   |
|----------------|---------|---------|---------|---------|---------|---------|---------|---------|---|
| PE 20:0_20:4_1 | 0.3580  | 0.5121  | 0.1910  | 0.1649  | -0.1213 | -0.4726 | -1.0728 | -0.3074 |   |
| PE 20:0_22:6   | 0.6501  | 0.6296  | 0.2559  | 0.5178  | -0.4575 | -1.4076 | -1.4246 | -1.3114 | x |
| PE 20:1_22:6   | 0.2610  | -0.2813 | 0.4263  | 0.5035  | -0.8199 | -1.9687 | -0.2974 | -0.6487 | x |
| PE 20:4_22:6   | 0.5782  | 0.5723  | 0.2301  | 0.4105  | -0.7051 | -1.4972 | -0.8707 | -0.7288 | x |
| PE 24:1_20:4   | 0.4451  | 0.6473  | 0.1176  | 0.5966  | -0.0590 | -0.1226 | -1.1990 | -1.9850 |   |
| PE 37:6        | 0.4449  | 0.5096  | 0.0206  | 0.3155  | -0.3796 | -0.9790 | -0.7898 | -0.4590 |   |
| PE 38:5        | 0.4703  | 0.6636  | 0.4854  | 0.6855  | -0.1332 | -1.1886 | -2.0886 | -0.1389 |   |
| PE 38:7        | 0.5642  | 0.8237  | 0.1944  | 0.3198  | -0.7034 | -0.3808 | -0.4237 | -0.5095 |   |
| PE 39:7        | 0.4780  | 0.6795  | 0.4488  | 0.4169  | -0.3439 | -0.7546 | -1.7044 | -0.5706 |   |
| PE 40:6        | 0.3497  | 0.8301  | 0.1693  | 0.2981  | -0.2232 | -0.7438 | -0.8586 | -0.5571 |   |
| PE 40:7        | 0.4461  | 0.7169  | 0.4252  | 0.3647  | -0.4117 | -0.8312 | -0.9205 | -0.6972 |   |
| PE 40:7_1      | 0.4954  | 0.7787  | 0.3828  | 0.3467  | -0.8225 | -1.1255 | -1.1561 | -0.9799 |   |
| PE 42:7        | 0.2954  | 0.6133  | 0.3580  | 0.2374  | -0.0115 | -0.6626 | -0.6345 | -0.4685 |   |
| PG 16:0_18:2   | 0.3145  | 0.5771  | 0.1753  | 0.2229  | -0.2529 | -0.6317 | -0.7663 | -0.1840 |   |
| PG 16:1_18:1_1 | -0.1759 | -0.0472 | -0.0023 | -0.1406 | 1.0424  | 0.5814  | 0.6590  | 0.8451  |   |
| PG 16:1_18:2   | -0.2515 | 0.0877  | 0.0428  | -0.1072 | 0.9380  | 0.5755  | 0.6992  | 0.8541  |   |
| PG 18:1_18:1   | -0.2222 | 0.0909  | 0.0064  | -0.1624 | 0.9439  | 0.4913  | 0.5293  | 0.6361  |   |
| PG 18:1_18:2   | -0.3620 | -0.0134 | -0.0475 | -0.2058 | 0.9631  | 0.5632  | 0.5906  | 0.8030  |   |
| PG 18:1_20:3   | -0.2853 | 0.1636  | 0.1519  | -0.0770 | 0.7248  | 0.7631  | 0.6045  | 0.7126  |   |
| PG 18:1_22:5   | -0.0636 | 0.1441  | 0.0632  | -0.0061 | -0.4684 | -1.4424 | -0.7852 | -0.4955 |   |
| PG 18:2_18:2_1 | -0.3034 | 0.2078  | 0.0223  | -0.2613 | 0.8221  | 0.4027  | 0.4495  | 0.7607  |   |
| PG 18:2_20:4   | 0.4394  | 0.7683  | 0.5691  | 0.1409  | 0.1017  | -0.0942 | -0.2285 | -0.1202 |   |
| PG 18:2_22:5   | 0.3978  | 0.5875  | 0.4354  | 0.3337  | -0.9391 | -1.0054 | -0.9716 | -0.8504 |   |
| PG 18:2_22:6   | 0.5639  | 0.6988  | 0.5211  | 0.3450  | -0.8969 | -0.9971 | -1.0672 | -0.8495 | x |
| PG 18:3_22:6   | 0.9119  | 1.0645  | 0.0832  | 0.2716  | -0.9422 | -1.0874 | -1.1059 | -0.9829 | x |
| PG 20:3_22:5   | 0.3974  | 0.5505  | -0.1850 | 0.4020  | -0.9784 | -1.1256 | -1.1444 | -1.0197 |   |
| PG 20:4_22:5   | 0.1223  | 0.1720  | -0.0257 | 0.1358  | -0.8724 | -1.0295 | -1.0495 | -0.9165 |   |
| PG 20:4_22:6   | 0.6634  | 0.7107  | 0.4614  | 0.3304  | -0.8104 | -0.9843 | -1.0064 | -0.8592 | x |

|                   |         |         |         |         |         |         |         |         |   |
|-------------------|---------|---------|---------|---------|---------|---------|---------|---------|---|
| PG 22:5_22:5      | -0.0730 | -0.0270 | 0.2116  | 0.2369  | -1.3587 | -1.4777 | -0.7656 | -1.3921 |   |
| PG 22:5_22:6      | 0.1004  | 0.1199  | -0.0375 | -0.0965 | -0.8844 | -1.0354 | -1.0547 | -0.9267 | x |
| PG 22:6_22:6      | 0.6419  | 0.6517  | 0.3944  | 0.1451  | -0.8294 | -1.0005 | -1.0223 | -0.8774 | x |
| PI 16:0_20:3      | -0.5933 | -0.2083 | -0.0788 | -0.3914 | 0.7436  | 0.3065  | 0.8149  | 0.8531  |   |
| PI 16:0_20:3_1    | -0.4609 | -0.3101 | -0.2058 | -0.4433 | 0.7365  | 0.1705  | 0.6882  | 0.5980  |   |
| PI 16:0_22:6      | 0.4025  | 0.3814  | 0.6460  | 0.5333  | -0.7224 | -1.1140 | -1.1168 | -0.8957 | x |
| PI 17:0_20:4      | 0.5072  | 0.3597  | 0.2456  | 0.4249  | -0.5137 | -0.9468 | -0.1790 | -0.1336 |   |
| PI 18:0_20:3      | -0.4073 | -0.2955 | -0.0491 | -0.6002 | 0.7204  | 0.2720  | 0.7830  | 0.9505  |   |
| PI 18:0_20:3_1    | -0.7757 | -0.4316 | -0.0771 | -0.4112 | 0.6615  | 0.2097  | 0.7516  | 0.7169  |   |
| PI 18:0_22:5      | -0.0112 | -0.1592 | -0.2274 | -0.1915 | -0.6514 | -1.1255 | -0.8140 | -0.5039 |   |
| PI 18:0_22:6      | 0.4812  | 0.5420  | 0.6214  | 0.2274  | -0.8729 | -1.2572 | -0.8711 | -0.7343 | x |
| PI 18:1_20:3      | -0.0006 | -0.4828 | -0.2719 | -0.2231 | 0.5683  | 0.2657  | 0.3957  | 0.7430  |   |
| PS 16:0_22:6      | 0.5781  | 0.5734  | 0.6591  | 0.2888  | -0.8884 | -0.6916 | -1.3232 | -1.4629 | x |
| PS 18:0_22:6      | 0.4024  | 0.5217  | 0.5147  | 0.2108  | -0.8257 | -0.8729 | -0.9139 | -0.9000 | x |
| PS 18:2_18:3      | -0.0936 | 0.0423  | -0.3051 | -0.2308 | 0.9574  | 0.2031  | 0.2175  | 0.7492  |   |
| SM d18:0_22:0     | 0.3118  | 0.6385  | 0.2077  | 0.0837  | -0.0441 | -0.5498 | -0.4821 | -0.4173 |   |
| SM d41:2          | 0.1890  | 0.2772  | -0.0193 | 0.1331  | 0.1016  | -0.9525 | -0.6439 | -0.4255 |   |
| SM d41:3          | 0.7741  | -0.6515 | 0.0701  | -0.7766 | 1.2960  | 0.5717  | 1.0494  | 1.1882  |   |
| TG 14:0_16:0_18:1 | -0.3577 | -0.1605 | -0.0861 | -0.3440 | 1.3074  | 0.0968  | 0.6340  | 0.9033  |   |
| TG 14:0_16:1_18:2 | -0.6707 | -0.3106 | 0.1439  | -0.2060 | 1.2646  | 0.8265  | 0.6056  | 1.0642  |   |
| TG 14:1_14:1_18:1 | -0.7336 | 0.0790  | -0.7375 | -1.6102 | 0.5685  | 1.1082  | 1.1750  | 1.2717  |   |
| TG 16:0_16:0_16:0 | -0.2002 | -0.3940 | -0.3545 | -0.0156 | 0.9890  | 0.5064  | 0.2096  | 0.9470  |   |
| TG 16:0_16:0_18:1 | -0.4399 | -0.1409 | 0.0577  | -0.4408 | 1.3412  | 0.4132  | 0.7412  | 0.8993  |   |
| TG 16:0_16:1_18:1 | -0.4692 | -0.0559 | 0.1617  | -0.2785 | 1.3744  | 0.3359  | 0.7492  | 0.8959  |   |
| TG 16:0_16:1_18:2 | -0.3393 | 0.1054  | 0.2531  | -0.3221 | 1.2094  | 0.3051  | 0.6512  | 0.8194  |   |
| TG 16:0_18:0_18:1 | -0.3099 | 0.1848  | -0.3952 | -0.1472 | 1.1832  | 0.1593  | 0.4189  | 0.6227  |   |
| TG 16:0_18:1_18:1 | -0.5314 | -0.0355 | 0.2138  | -0.4737 | 1.3139  | 0.4491  | 0.7676  | 0.8684  |   |
| TG 16:0_18:1_18:2 | -0.5293 | 0.1144  | 0.2325  | -0.5266 | 1.3290  | 0.2815  | 0.6520  | 0.8511  |   |

|                   |         |         |         |         |         |         |         |         |  |
|-------------------|---------|---------|---------|---------|---------|---------|---------|---------|--|
| TG 16:0_18:1_20:1 | -0.4993 | 0.0715  | 0.1644  | -0.5340 | 1.2498  | 0.1338  | 0.3456  | 0.6332  |  |
| TG 16:0_18:1_22:5 | -0.9377 | -1.2616 | -0.4431 | -0.2766 | 0.4446  | 0.0067  | -0.4523 | 0.4821  |  |
| TG 16:0_18:2_18:2 | -0.4975 | 0.3247  | 0.3011  | -0.5134 | 1.1161  | 0.1773  | 0.4819  | 0.7614  |  |
| TG 16:1_16:1_18:2 | -0.8556 | 0.3145  | 0.2625  | -0.2175 | 1.0804  | 0.3784  | 0.6404  | 0.8516  |  |
| TG 48:2           | -0.5754 | -0.3180 | -0.0453 | -0.8044 | 1.1821  | 0.2483  | 0.6517  | 0.8697  |  |
| TG 48:2_1         | -0.4731 | -0.2366 | 0.0139  | -0.5668 | 1.1415  | 0.4165  | 0.6100  | 0.8545  |  |
| TG 48:3           | -0.6665 | -0.3041 | 0.1591  | -0.1989 | 1.2808  | 0.7511  | 0.6170  | 1.0539  |  |
| TG 50:1           | -0.4543 | -0.1535 | 0.0474  | -0.4551 | 1.3432  | 0.4057  | 0.7364  | 0.8950  |  |
| TG 50:2           | -0.4693 | -0.0560 | 0.1616  | -0.2786 | 1.3744  | 0.3359  | 0.7494  | 0.8958  |  |
| TG 50:3           | -0.4392 | 0.1053  | 0.2531  | -0.3225 | 1.2102  | 0.3052  | 0.6515  | 0.8198  |  |
| TG 50:4           | -0.8342 | 0.2861  | 0.2711  | -0.1946 | 1.0796  | 0.3857  | 0.6447  | 0.8534  |  |
| TG 52:1           | -0.5464 | 0.2241  | -0.3314 | -0.0937 | 1.1804  | 0.1997  | 0.4484  | 0.6403  |  |
| TG 52:2           | -0.5318 | -0.0357 | 0.2137  | -0.4741 | 1.3142  | 0.4491  | 0.7664  | 0.8686  |  |
| TG 52:3           | -0.5293 | 0.1144  | 0.2325  | -0.5266 | 1.3290  | 0.2815  | 0.6520  | 0.8511  |  |
| TG 52:4           | -0.4986 | 0.3242  | 0.3005  | -0.5145 | 1.1161  | 0.1767  | 0.4800  | 0.7612  |  |
| TG 54:4           | -0.5409 | 0.1540  | 0.3072  | -0.6524 | 1.2152  | 0.3383  | 0.6382  | 0.8390  |  |
| TG 56:4           | -0.2747 | -0.0271 | 0.1300  | -0.7015 | 1.0434  | 0.2944  | 0.4684  | 0.6690  |  |
| TG 56:8           | 0.2785  | 0.6724  | 0.8572  | 0.4328  | -1.6305 | -1.1695 | -0.8600 | -0.4990 |  |
| TG 58:10          | 0.5725  | 0.7184  | 0.3768  | 0.1703  | -0.5739 | -0.2138 | -1.9085 | -0.7648 |  |
| TG 58:8           | -1.1756 | 0.5441  | 0.6753  | 0.4467  | -1.4156 | -0.2330 | -1.2576 | -1.1926 |  |
| TG 58:9           | 0.1294  | 0.4146  | 0.3222  | -0.0330 | -0.3425 | -0.8879 | -1.3568 | -0.6779 |  |

Red denotes upregulation, blue denotes downregulation.

**Supplementary Table 7: Significantly-Altered Lipids in *Tmem135*<sup>FUN025/FUN025</sup> (*FUN025*) Retinas Compared to WT.**

| Lipid Species          | Normalized Log10 Lipid Concentrations |         |         |         |          |          |          |          | Contains DHA |
|------------------------|---------------------------------------|---------|---------|---------|----------|----------|----------|----------|--------------|
|                        | WT 1                                  | WT 2    | WT 3    | WT 4    | FUN025 1 | FUN025 2 | FUN025 3 | FUN025 4 |              |
| BMP 22:5_22:6          | 0.2876                                | 0.2769  | 0.3964  | 0.3320  | -0.5968  | -1.0183  | -0.1523  | -1.9294  | x            |
| BMP 22:6_22:6          | 0.3649                                | 0.3052  | 0.4336  | 0.3237  | -0.7597  | -0.9087  | -0.9058  | -0.8890  | x            |
| CE 22:6                | 0.3906                                | 0.0216  | 0.5295  | 0.3516  | -0.8096  | -0.7755  | -0.9582  | -1.8064  | x            |
| Cer_AS d18:1_16:0      | 0.3665                                | 0.3304  | -0.0938 | 0.2750  | -0.3596  | -0.0703  | -0.7652  | -0.7592  |              |
| Cer_AS d18:1_16:0_1    | 0.3649                                | 0.3289  | -0.0951 | 0.2681  | -0.3609  | -0.0717  | -0.7661  | -0.7602  |              |
| Cer_NDS d18:0_24:0     | -0.4681                               | -0.5319 | -0.5503 | -0.5258 | 0.9750   | 1.1662   | 0.4818   | 0.6056   |              |
| Cer_NP t18:0_20:0      | 0.5235                                | 0.4109  | 0.4131  | 0.4572  | -1.4230  | -1.4870  | 0.6306   | -2.3382  |              |
| Cer_NS d18:1_16:0      | 0.1033                                | -0.0677 | 0.2009  | 0.0375  | -0.0515  | -0.3984  | -0.4919  | -0.3154  |              |
| Cer_NS d18:1_22:2      | 0.1144                                | -0.2408 | 0.5188  | 0.1867  | -0.1446  | -0.4831  | -0.6933  | -0.3039  |              |
| Cer_NS d18:1_23:0      | 0.1600                                | -0.0934 | 0.1631  | 0.0735  | -0.0615  | -0.4534  | -0.4018  | -1.0032  |              |
| Cer_NS d18:2_16:0      | 0.2804                                | 0.0682  | -0.0519 | 0.2471  | -0.3895  | -0.4621  | -0.6047  | -0.3516  |              |
| Cer_NS d18:2_18:0      | 0.2148                                | -0.0943 | 0.4146  | -0.1116 | -0.1507  | -0.3707  | -0.5273  | -0.4997  |              |
| Cer_NS d18:2_22:0      | 0.1725                                | -0.2431 | 0.2432  | -0.0098 | -0.0914  | -0.6352  | -0.4075  | -0.4790  |              |
| Cer_NS d18:2_24:1      | 0.1383                                | -0.2094 | 0.2551  | 0.0961  | -0.1778  | -0.5137  | -0.5485  | -0.4739  |              |
| CL 18:0_18:2_18:1_18:1 | 0.1963                                | -0.0053 | 0.3992  | -0.3328 | -0.2981  | -0.4183  | -0.5629  | -0.3110  |              |
| CL 68:2                | 0.2363                                | 0.1382  | 0.5639  | -0.2568 | -0.5175  | -0.5346  | -0.4227  | -0.4092  |              |
| CL 70:3                | -0.0098                               | 0.2240  | 0.4763  | -0.1145 | -0.3115  | -0.5929  | -0.6578  | -0.2087  |              |
| DG 14:0_16:0           | -0.0977                               | -0.0441 | -0.4831 | -0.9435 | 0.7688   | 0.4386   | 0.5539   | 0.4758   |              |
| DG 16:0_20:4           | 0.0885                                | -0.0444 | 0.1021  | 0.0903  | -0.2370  | -0.6859  | -0.4274  | -0.4441  |              |
| DG 16:0_22:6           | 0.4736                                | 0.4037  | 0.4220  | 0.4680  | -0.9780  | -0.9326  | -1.0818  | -1.0736  | x            |
| DG 18:0_20:5           | 0.1809                                | 0.1873  | 0.2597  | 0.4391  | -1.2146  | -0.4136  | -0.1651  | -1.0126  |              |
| DG 18:0_22:6           | 0.4396                                | 0.2445  | 0.3482  | 0.3521  | -0.9648  | -1.1091  | -0.9802  | -0.6076  | x            |
| DG 22:6_22:6           | 0.3445                                | 0.0599  | 0.3343  | 0.1673  | -0.4777  | -0.6306  | -0.6529  | -0.8163  | x            |
| EtherPE 14:1e_20:4     | 0.3546                                | 0.3170  | 0.0337  | 0.2192  | -0.1469  | -0.6962  | -0.5621  | -0.5725  |              |
| EtherPE 16:0e_16:0     | -0.3612                               | -0.3115 | 0.1294  | 0.1297  | 1.0782   | 0.7224   | 0.6941   | 0.7948   |              |



|                      |         |         |         |         |         |         |         |         |   |
|----------------------|---------|---------|---------|---------|---------|---------|---------|---------|---|
| EtherPE 16:0e_18:2   | -0.2347 | -0.2991 | -0.2897 | -0.2084 | 1.0662  | 0.6349  | 0.7569  | 0.6905  |   |
| EtherPE 16:0e_22:4   | -0.2738 | -0.4719 | -0.3286 | -0.3739 | 1.2369  | 0.9125  | 1.0204  | 0.9463  |   |
| EtherPE 16:1e_16:0   | -0.2407 | -0.2207 | -0.1891 | -0.4431 | 0.7901  | 0.3454  | 0.2851  | 0.3449  |   |
| EtherPE 16:1e_16:1   | 0.1225  | -0.1859 | -0.2193 | -1.3173 | 0.9429  | 0.8157  | 0.7977  | 0.7692  |   |
| EtherPE 16:1e_16:3   | -0.7609 | 0.1505  | 0.0175  | -0.8081 | 1.1832  | 1.0634  | 0.9684  | 1.0284  |   |
| EtherPE 16:1e_18:1   | -0.0791 | -0.3541 | -0.2301 | -0.2068 | 0.8524  | 0.4393  | 0.6358  | 0.3909  |   |
| EtherPE 16:1e_18:2   | 0.1711  | 0.2987  | -1.4778 | -1.4623 | 1.3202  | 1.1775  | 1.1865  | 1.1875  |   |
| EtherPE 16:1e_18:3   | -0.0674 | -0.1581 | -1.2677 | -0.0539 | 1.1153  | 0.9510  | 0.8811  | 1.1442  |   |
| EtherPE 16:1e_20:3   | 0.0181  | -0.0693 | 0.0349  | -0.3161 | 1.0597  | 0.8604  | 0.9146  | 0.9286  |   |
| EtherPE 16:1e_20:3_1 | 0.2212  | -0.5136 | 0.2267  | -0.7001 | 0.9184  | 0.9014  | 0.9359  | 0.8561  |   |
| EtherPE 16:1e_22:4   | -0.3844 | -0.4553 | -0.2568 | -0.2936 | 0.8945  | 0.6250  | 0.6346  | 0.6486  |   |
| EtherPE 16:1e_22:5   | -0.4628 | -0.5933 | -0.4360 | -0.5837 | 0.4617  | 0.0588  | 0.1115  | 0.1303  |   |
| EtherPE 16:1e_22:6   | 0.2823  | 0.1859  | 0.2737  | 0.1631  | -0.1757 | -0.6980 | -0.5683 | -0.6111 | x |
| EtherPE 18:0e_22:4   | -0.4035 | -0.4412 | -0.3113 | -0.3991 | 1.0222  | 0.6496  | 0.7802  | 0.7678  |   |
| EtherPE 18:0e_22:5   | 0.0192  | 0.0624  | 0.3223  | -0.0016 | 1.1887  | 1.0609  | 1.0543  | 1.1253  |   |
| EtherPE 18:1e_16:0   | -0.7941 | -0.2114 | -0.1162 | -0.1237 | 0.8590  | 0.5856  | 0.6162  | 0.5285  |   |
| EtherPE 18:1e_18:2   | -0.1563 | -0.3929 | -0.2826 | -0.2374 | 0.9182  | 0.6552  | 0.6852  | 0.6505  |   |
| EtherPE 18:1e_20:3   | 0.2777  | -0.3430 | -0.1734 | 0.2215  | 1.1798  | 0.2620  | 0.9564  | 0.9497  |   |
| EtherPE 18:1e_22:3   | -0.1604 | -0.9591 | -0.4966 | -0.4316 | 0.8215  | 0.5417  | 0.5231  | 0.7259  |   |
| EtherPE 18:1e_22:4   | -0.1057 | -0.4869 | -0.3358 | -0.3679 | 0.6906  | 0.3504  | 0.3636  | 0.3223  |   |
| EtherPE 18:1e_22:5   | -0.4373 | -0.7937 | -0.4824 | -0.5211 | -0.0042 | -0.3039 | -0.2278 | -0.2951 |   |
| EtherPE 18:1e_22:5_1 | -0.0007 | -0.2818 | -0.2096 | -0.1266 | 0.7910  | 0.4576  | 0.4291  | 0.4486  |   |
| EtherPE 18:1e_22:6   | 0.3393  | 0.2627  | 0.3072  | 0.2530  | -0.6005 | -0.8877 | -0.8457 | -0.8436 | x |
| EtherPE 18:1e_24:4   | -0.1724 | -0.9620 | -0.8251 | -0.1303 | 0.6959  | 0.6828  | 0.7400  | 0.6113  |   |
| EtherPE 18:2e_22:6   | 0.3180  | 0.2659  | 0.2727  | 0.2730  | -0.4174 | -0.7242 | -0.7633 | -0.7802 | x |
| EtherPE 18:3e_18:2   | -0.2700 | -0.5800 | 0.0844  | -0.1158 | 1.0771  | 0.7278  | 0.7865  | 0.8949  |   |
| EtherPE 38:5e        | 0.0001  | 0.0337  | -1.1432 | -1.0331 | 0.7909  | 0.5804  | 0.5489  | 0.6093  |   |
| EtherPE 40:5e        | 0.1667  | -1.0789 | -1.0910 | -1.0749 | 1.3251  | 1.3337  | 1.2717  | 1.3603  |   |

|                |         |         |         |         |         |         |         |         |   |
|----------------|---------|---------|---------|---------|---------|---------|---------|---------|---|
| FA 20:0        | 0.2678  | -0.0155 | 0.0407  | 0.3818  | -0.2993 | -0.4919 | -0.4113 | -0.6693 |   |
| GM3 d36:1      | 0.1792  | -0.0782 | 0.4517  | 0.0179  | -0.1096 | -0.2689 | -1.0672 | -0.3313 |   |
| LPC 0:0/16:0   | 0.2576  | -0.2728 | 0.4501  | -0.0529 | -0.0387 | -0.5670 | -0.4052 | -0.6003 |   |
| LPC 0:0/16:1   | -0.4792 | -0.1204 | 0.1106  | -0.2212 | 0.9482  | 0.5816  | 0.7372  | 0.6043  |   |
| LPC 0:0/18:2   | -0.1552 | -0.6180 | -0.0338 | -0.2027 | 0.7652  | 0.1303  | 0.3417  | 0.2593  |   |
| LPC 0:0/22:5   | -0.0349 | -0.3825 | -0.0585 | -0.1909 | -0.4138 | -0.8726 | -0.6774 | -0.9009 |   |
| LPC 0:0/22:6   | 0.5021  | 0.2908  | 0.5848  | 0.4068  | -0.9152 | -1.1970 | -1.1029 | -1.1688 | x |
| LPE 18:1       | -0.2423 | -0.4740 | 0.0440  | -0.2653 | 0.7055  | 0.0262  | 0.4386  | 0.4531  |   |
| LPE 22:6       | 0.2702  | 0.2793  | 0.5438  | 0.2060  | -0.4284 | -1.4835 | -0.9995 | -0.7369 | x |
| LPE 22:6_1     | 0.2746  | 0.2837  | 0.4947  | 0.2102  | -0.4258 | -1.4832 | -0.9981 | -0.7348 | x |
| LPS 22:6       | 0.4273  | 0.1870  | 1.0111  | -0.0623 | -0.4516 | -1.6882 | -0.6733 | -0.4450 | x |
| PC 14:0_14:0   | -0.2595 | -0.3208 | -0.1743 | -0.2610 | 0.7573  | 0.3581  | 0.3618  | 0.4404  |   |
| PC 14:0_16:1   | -1.1476 | -0.2179 | -0.3951 | -0.2109 | 1.1242  | 0.9747  | 0.9390  | 0.9279  |   |
| PC 14:0_18:2   | -0.3015 | -0.0348 | -0.2351 | -0.5735 | 0.3893  | 0.2486  | 1.0592  | 0.9570  |   |
| PC 15:0_16:0   | -0.1427 | -0.5783 | 0.1582  | -0.1080 | 0.6694  | 0.2197  | 0.2147  | 0.3522  |   |
| PC 15:0_18:0   | -0.3177 | -0.6908 | 0.0692  | -0.2354 | 0.7073  | 0.4925  | 0.2613  | 0.4259  |   |
| PC 16:0_16:0   | 0.1324  | 0.0045  | 0.0654  | 0.0444  | -0.1132 | -0.4838 | -0.5401 | -0.4529 |   |
| PC 16:0_16:1   | -0.2953 | -0.4994 | -0.0339 | -0.3025 | 0.9749  | 0.7402  | 0.6988  | 0.7265  |   |
| PC 16:0_16:3   | -0.1783 | -0.4274 | -0.0484 | -0.5343 | 0.7051  | 0.1988  | 0.2572  | 0.4892  |   |
| PC 16:0_17:0   | 0.5385  | 0.5127  | 0.3297  | 0.3717  | -0.4899 | -0.2402 | -0.7237 | -1.0654 |   |
| PC 16:0_18:0   | 0.1014  | -0.0653 | 0.2017  | 0.0626  | -0.2313 | -0.6114 | -0.6184 | -0.5786 |   |
| PC 16:0_18:2   | -0.3160 | -0.5576 | -0.0818 | -0.3225 | 0.7868  | 0.5471  | 0.5395  | 0.5986  |   |
| PC 16:0_18:3   | -0.1679 | -0.8705 | -0.1574 | -0.2724 | 0.6825  | 0.2981  | 0.4371  | 0.4390  |   |
| PC 16:0_20:3   | -0.1525 | -0.5797 | 0.1722  | -0.2394 | 0.6611  | 0.2307  | 0.2293  | 0.2810  |   |
| PC 16:0_22:4_1 | -0.1586 | -0.8722 | -0.0461 | -0.4080 | 0.5162  | 0.4656  | 0.4434  | 0.2247  |   |
| PC 16:0_22:5   | -0.3323 | -0.1880 | 0.2641  | -0.2780 | -0.6551 | -0.6460 | -0.9805 | -0.4811 |   |
| PC 16:0_22:6   | 0.4983  | 0.4305  | 0.5285  | 0.4679  | -1.0784 | -1.2045 | -1.2224 | -1.2186 | x |
| PC 16:1_16:1_1 | 0.3038  | 1.1530  | 0.3642  | 1.2097  | -1.1638 | -1.2535 | -1.2518 | -1.2416 |   |

|                |         |         |         |         |         |         |         |         |   |
|----------------|---------|---------|---------|---------|---------|---------|---------|---------|---|
| PC 16:1_18:2   | -0.2800 | -0.4284 | -0.2368 | -0.4000 | 0.8618  | 0.8257  | 0.6762  | 0.6539  |   |
| PC 16:1_22:6   | 0.6796  | -0.5840 | -0.6008 | -0.5784 | 1.1221  | 0.3408  | 1.0832  | 1.0848  | x |
| PC 18:0_18:1   | 0.3340  | -0.0050 | -0.1266 | 0.1217  | -0.3340 | -0.2835 | -0.4884 | -0.3391 |   |
| PC 18:0_20:3   | -0.3431 | -0.5626 | -0.0643 | -0.3060 | 0.9170  | 0.5146  | 0.5631  | 0.6280  |   |
| PC 18:0_20:4   | -0.2483 | -0.5361 | -0.3337 | -0.2747 | 0.5155  | 0.1679  | 0.2232  | 0.2481  |   |
| PC 18:0_22:6   | 0.4276  | 0.3464  | 0.4312  | 0.3972  | -0.9047 | -1.0764 | -1.1001 | -1.0865 | x |
| PC 18:1_18:2   | -0.3375 | -0.5818 | -0.1095 | -0.4202 | 0.7304  | 0.5182  | 0.4629  | 0.5140  |   |
| PC 18:1_20:2   | -0.5425 | -0.6822 | 0.0518  | -0.9250 | 0.8788  | 0.8434  | 0.0970  | 0.6724  |   |
| PC 18:1_22:5   | 0.0458  | 0.1612  | 0.3529  | 0.0512  | -0.4009 | -0.5302 | -1.3718 | -1.3374 |   |
| PC 18:1_22:6   | 0.4716  | 0.4001  | 0.5500  | 0.4578  | -0.9646 | -1.0938 | -1.3109 | -1.1955 | x |
| PC 18:2_18:2   | -0.2811 | -0.4851 | -0.2017 | -0.4020 | 0.7240  | 0.6240  | 0.5301  | 0.5867  |   |
| PC 18:2_22:6   | 0.3664  | 0.1667  | 0.4776  | 0.2609  | -0.6495 | -0.7420 | -0.8170 | -0.8149 | x |
| PC 19:0_22:6   | -0.5649 | -0.6899 | -0.0578 | 0.3109  | 0.7656  | 0.4171  | 0.5859  | 0.5467  | x |
| PC 2:0_22:6    | 0.3737  | 0.3783  | 0.4586  | 0.0924  | -0.8499 | -0.9845 | -0.9819 | -0.9667 | x |
| PC 20:0_22:6   | 0.3595  | 0.1380  | 0.4347  | 0.2422  | -0.3939 | -0.6039 | -0.9889 | -1.5736 | x |
| PC 20:1_22:6   | 0.3814  | 0.2711  | 0.3967  | 0.3400  | -0.9604 | -0.8524 | -0.8507 | -0.7487 | x |
| PC 20:3_22:6   | 0.4986  | 0.4285  | 0.3681  | 0.4693  | -0.2745 | -1.5725 | -0.6064 | -1.1151 | x |
| PC 20:4_22:6   | 0.3410  | 0.2100  | 0.4458  | 0.3443  | -0.9657 | -1.1242 | -1.1606 | -1.1586 | x |
| PC 20:5_22:6   | 0.5811  | 0.4834  | 0.6590  | 0.4859  | -1.4366 | -1.5327 | -1.5309 | -0.7726 | x |
| PC 22:0_22:6   | 0.5614  | 0.3567  | 0.4618  | 0.3990  | -0.6499 | -0.7335 | -1.9602 | -1.1077 | x |
| PC 22:5_22:6_1 | 0.3875  | 0.2469  | 0.4222  | 0.4173  | -1.1940 | -1.4588 | -1.2360 | -1.3177 | x |
| PC 22:6_22:6   | 0.7420  | 0.6953  | 0.8019  | 0.7217  | -1.5918 | -1.7653 | -1.9353 | -1.9718 | x |
| PC 26:0_26:2   | -0.3775 | -1.2292 | -1.2434 | -1.2245 | 1.2835  | 0.8237  | 1.0805  | 0.8596  |   |
| PC 26:0_26:4   | -0.6807 | -1.0018 | -0.4857 | -0.5119 | 1.3099  | 1.1565  | 1.1461  | 1.1830  |   |
| PC 26:1_26:2   | -0.4527 | -0.6426 | -1.1306 | -0.5482 | 1.1930  | 0.9902  | 1.0679  | 1.1072  |   |
| PC 26:1_26:4   | -0.8190 | -0.5411 | -0.5019 | -0.2955 | 1.2170  | 1.0041  | 1.0628  | 1.0952  |   |
| PC 26:2_26:4   | -0.2660 | -0.3954 | -0.1747 | -0.4672 | 0.9670  | 0.2168  | 0.3431  | 0.8087  |   |
| PC 26:4_22:6   | 0.2385  | 0.1204  | 0.1879  | 0.1139  | -0.8033 | -0.8340 | -0.8133 | -1.6405 | x |

|              |         |         |         |         |         |         |         |         |  |
|--------------|---------|---------|---------|---------|---------|---------|---------|---------|--|
| PC 26:4_26:4 | 0.4702  | 0.1199  | 0.2937  | 0.2553  | -0.1012 | -0.4068 | -1.6434 | -0.6998 |  |
| PC 29:0      | -0.2315 | -0.4961 | -0.2426 | -0.3554 | 0.8944  | 0.6270  | 0.6207  | 0.7029  |  |
| PC 31:1      | -0.3397 | -0.4120 | -0.2714 | 0.1284  | 0.8022  | 0.4352  | 0.6832  | 0.4814  |  |
| PC 33:0      | -0.5655 | -0.6752 | -0.1776 | -0.4838 | 0.6147  | 0.3034  | 0.2966  | 0.4181  |  |
| PC 34:0      | -0.3608 | -0.5288 | 0.2201  | -0.2057 | 0.6380  | 0.1685  | 0.1934  | 0.2265  |  |
| PC 34:3      | -0.2896 | -0.5614 | -0.2463 | -0.2589 | 0.9743  | 0.7011  | 0.7803  | 0.8161  |  |
| PC 34:4      | 0.0645  | 0.0029  | 0.4780  | -0.1847 | -0.4807 | -0.5477 | -0.6388 | 0.0332  |  |
| PC 35:0_1    | -0.0923 | -0.8026 | 0.0108  | -0.4283 | 0.5620  | 0.3649  | 0.3419  | 0.3391  |  |
| PC 35:7      | -0.3523 | -0.5999 | -0.0338 | -0.3327 | 0.7705  | 0.4773  | 0.4660  | 0.5549  |  |
| PC 36:5      | -0.1129 | -0.0981 | 0.1321  | -0.6388 | 0.6607  | 0.4322  | 0.2478  | 0.4115  |  |
| PC 36:5_1    | 0.4072  | 0.2303  | 0.6389  | 0.7302  | -0.4319 | -0.9744 | -0.8044 | -0.4665 |  |
| PC 36:6      | 0.3692  | 0.3637  | 0.5463  | 0.4089  | -1.0205 | -0.9883 | -1.1057 | -1.2505 |  |
| PC 36:8      | 0.4570  | 0.1714  | 0.3206  | 0.2368  | -0.8067 | -0.9475 | -0.9447 | -0.9288 |  |
| PC 38:2      | -0.1869 | -0.6529 | -0.4079 | -0.2256 | 0.5623  | 0.1108  | 0.0649  | 0.2225  |  |
| PC 38:4      | -0.2406 | -0.9097 | -0.1496 | -0.3885 | 0.8589  | 0.6668  | 0.5961  | 0.5454  |  |
| PC 38:6      | -0.4583 | -0.5276 | -0.5477 | -0.5211 | 0.7175  | 0.7184  | 0.6565  | 0.7607  |  |
| PC 38:7      | 0.3421  | 0.4223  | 0.6179  | 0.5131  | -1.0024 | -1.1548 | -0.5820 | -1.1807 |  |
| PC 38:7_1    | 0.5032  | 0.4920  | 0.5961  | 0.4745  | -0.6310 | -0.8915 | -0.6180 | -1.8137 |  |
| PC 38:9      | 0.2922  | 0.3038  | 0.3344  | 0.2168  | -0.8112 | -0.9511 | -0.9484 | -0.9326 |  |
| PC 39:6      | 0.3233  | 0.3246  | 0.3961  | 0.2290  | -0.6329 | -1.0276 | -0.9041 | -0.9359 |  |
| PC 40:3      | -0.7514 | -0.7909 | -0.1600 | -0.7872 | 1.5957  | 1.6350  | 1.5649  | 1.3968  |  |
| PC 40:5      | -0.2682 | -0.4759 | -0.3065 | -0.2981 | 0.7560  | 0.3692  | 0.4554  | 0.5447  |  |
| PC 40:5_1    | -0.2864 | -0.3042 | -0.3253 | -0.3168 | 0.7661  | 0.3626  | 0.4675  | 0.5154  |  |
| PC 40:7      | -0.3699 | -0.5852 | -0.2228 | -0.3931 | 0.8472  | 0.5910  | 0.5794  | 0.6256  |  |
| PC 40:7_1    | 0.0764  | 0.0009  | 1.0353  | 0.3136  | -0.2003 | -1.7724 | -0.4110 | -0.6484 |  |
| PC 40:9      | 0.1784  | 0.1705  | 0.6583  | -0.1033 | -0.7019 | -0.9132 | -0.6789 | -0.6617 |  |
| PC 41:6      | 0.3398  | 0.1819  | 0.2700  | 0.0347  | -0.4245 | -0.8307 | -0.8571 | -1.3435 |  |
| PC 42:5      | -0.5755 | -0.4385 | -0.5791 | -0.8940 | 0.1777  | 0.3795  | 0.2788  | 0.2702  |  |

|                |         |         |         |         |         |         |         |         |   |
|----------------|---------|---------|---------|---------|---------|---------|---------|---------|---|
| PC 42:6        | 0.1418  | -0.1180 | 0.2897  | 0.1283  | -0.5836 | -0.6942 | -0.8449 | -0.6145 |   |
| PC 42:8        | 0.4789  | 0.3476  | 0.4863  | 0.4062  | -1.4263 | -1.9439 | -0.5563 | -0.7904 |   |
| PC 42:9        | 0.0109  | 0.2643  | 0.3160  | 0.0619  | -0.4474 | -0.7180 | -1.1377 | -0.6272 |   |
| PC 44:2        | 0.3113  | 0.2103  | 0.4078  | 0.2034  | -0.8510 | -0.8117 | -1.2582 | -0.8726 |   |
| PC 44:7        | 0.4331  | -0.0757 | 0.6639  | 0.1290  | -0.3547 | -1.4683 | -0.7900 | -0.7188 |   |
| PC 44:7_1      | -1.1106 | -0.0953 | -0.3000 | -0.2858 | 0.6695  | 0.5769  | 0.4037  | 0.6401  |   |
| PC 46:6        | 0.3508  | -0.5064 | 0.7481  | 0.6774  | -0.5988 | -1.4369 | -1.4350 | -1.4242 |   |
| PC 46:6_1      | 0.3905  | 0.2567  | 0.4910  | 0.4841  | -0.5492 | -1.0156 | -1.0001 | -1.8529 |   |
| PC 46:7_1      | 0.4264  | -0.1116 | 0.2891  | 0.2514  | -0.4720 | -1.5036 | -1.5014 | -0.3077 |   |
| PC 46:9        | -0.5168 | -0.2097 | -0.5081 | -0.1661 | 0.6491  | 0.3450  | 0.1132  | 0.4763  |   |
| PC 48:6        | 0.4809  | 0.3817  | 0.5087  | 0.4051  | -0.8178 | -1.7352 | -0.9652 | -0.9654 |   |
| PC 48:7        | 0.7679  | 0.7224  | 0.1462  | 0.5327  | -0.5378 | -1.7503 | -0.7300 | -0.8112 |   |
| PC 50:3        | -1.1987 | -1.2410 | -0.0431 | -0.4689 | 1.3530  | 1.3299  | 1.3042  | 1.3477  |   |
| PC 50:4        | -0.6146 | -0.6998 | -0.4911 | -0.7946 | 1.1590  | 1.0020  | 1.0764  | 1.0948  |   |
| PC 50:5        | -0.3465 | -0.4872 | -0.2162 | -0.3159 | 0.9524  | 0.5770  | 0.7055  | 0.7479  |   |
| PC 50:6        | 0.2749  | 0.2441  | 0.4581  | 0.2879  | -0.6245 | -1.7924 | -0.9985 | -0.0272 |   |
| PE 14:0_16:0   | -0.4383 | -0.3083 | -0.1797 | -0.2597 | 0.9505  | 0.5024  | 0.5464  | 0.2795  |   |
| PE 14:0_18:2   | -0.4688 | -0.2663 | -0.4661 | -0.2500 | 1.1768  | 0.7472  | 0.7233  | 0.5668  |   |
| PE 15:0_22:6   | 0.4327  | 0.2060  | 0.2300  | 0.2991  | -0.2164 | -0.6843 | -0.5090 | -0.6367 | x |
| PE 16:0_14:1   | -0.6250 | -0.3905 | -0.2445 | -0.2814 | 0.7236  | 0.5881  | 0.6880  | 0.7582  |   |
| PE 16:0_16:1   | -0.2220 | -0.5884 | -0.1443 | -0.5108 | 0.7769  | 0.8754  | 0.8714  | 0.9082  |   |
| PE 16:0_16:1_1 | -0.1948 | -0.3594 | -0.1101 | -0.5083 | 1.0297  | 0.6317  | 0.7448  | 0.6752  |   |
| PE 16:0_18:2   | -0.3875 | -0.3817 | -0.3458 | -0.3613 | 0.9715  | 0.6955  | 0.7418  | 0.7468  |   |
| PE 16:0_22:4   | -0.4493 | -0.5986 | -0.4704 | -0.5029 | 0.4178  | 0.6832  | 0.7390  | 0.7322  |   |
| PE 16:0_22:5   | -0.4712 | -0.5662 | -0.6287 | -0.7134 | 0.3262  | 0.0115  | 0.0500  | 0.0112  |   |
| PE 16:0_22:6   | 0.3191  | 0.2405  | 0.2714  | 0.2391  | -0.4360 | -0.7440 | -0.7001 | -0.7013 | x |
| PE 16:1_18:2   | -0.3827 | -0.3881 | -0.4191 | -0.3426 | 1.0267  | 0.8794  | 0.8624  | 0.7975  |   |
| PE 16:1_20:4   | -0.1332 | -0.1758 | -0.1479 | -0.1289 | 0.6495  | 0.4882  | 0.4888  | 0.4541  |   |

|                |         |         |         |         |         |         |         |         |   |
|----------------|---------|---------|---------|---------|---------|---------|---------|---------|---|
| PE 18:0_18:1   | -0.1716 | -0.4414 | -0.2353 | -0.3772 | 0.7431  | 0.2765  | 0.3550  | 0.3585  |   |
| PE 18:0_18:2   | -0.2948 | -0.4356 | -0.3130 | -0.3971 | 0.8215  | 0.5490  | 0.6193  | 0.6488  |   |
| PE 18:0_18:2_1 | 0.0132  | -0.1637 | -0.5733 | -0.2471 | 0.9132  | 0.5732  | 0.0842  | 0.4959  |   |
| PE 18:0_20:1   | -0.2831 | -0.6964 | -0.3614 | -0.4347 | 0.6549  | 0.4168  | 0.3626  | 0.2759  |   |
| PE 18:0_20:3_1 | -0.1123 | -0.4025 | -0.0553 | -0.4909 | 0.9273  | 0.6734  | 0.5726  | 0.3424  |   |
| PE 18:0_20:4_2 | 0.6241  | 0.6568  | 0.2246  | 0.4952  | -1.6207 | 0.0469  | -0.8941 | -1.7135 |   |
| PE 18:0_22:3   | -0.1207 | -0.4860 | -0.3104 | -0.3872 | 0.7064  | 0.4114  | 0.3371  | 0.3827  |   |
| PE 18:0_22:4   | -0.4340 | -0.6227 | -0.4164 | -0.4911 | 0.6029  | 0.2733  | 0.3517  | 0.3250  |   |
| PE 18:0_22:5_1 | 0.3416  | 0.2512  | 0.3023  | 0.2450  | -0.6113 | -0.8985 | -0.7907 | -0.8123 |   |
| PE 18:0_22:6_1 | 0.2963  | 0.5031  | 0.2188  | 0.4099  | -1.3723 | -0.7359 | -0.6176 | -0.5911 | x |
| PE 18:1_18:2   | -0.3581 | -0.4832 | -0.3521 | -0.5025 | 0.9379  | 0.6671  | 0.7158  | 0.5334  |   |
| PE 18:1_20:4   | -0.3925 | -0.5692 | -0.1282 | -0.2698 | 0.8217  | 0.6084  | 0.5401  | 0.4123  |   |
| PE 18:1_22:5   | -0.9099 | -0.4378 | -0.1256 | -0.2658 | 0.6303  | 0.3364  | 0.2928  | 0.3298  | x |
| PE 18:1_22:6   | 0.2795  | 0.2016  | 0.1672  | 0.1689  | -0.1042 | -0.6137 | -0.4620 | -0.5241 |   |
| PE 18:2_18:2   | -0.1982 | -0.2684 | -0.3288 | -0.3308 | 0.6550  | -0.1131 | 0.4820  | 0.4811  |   |
| PE 18:2_22:5   | 0.0062  | -0.1901 | -0.3066 | -0.1250 | 0.5349  | 0.3173  | 0.4176  | 0.2933  |   |
| PE 18:3_22:6   | -0.1526 | -0.1674 | -0.4791 | -0.0795 | 0.7449  | 0.2899  | 0.5186  | 0.5152  | x |
| PE 18:3_22:6_1 | -0.0937 | -0.1829 | -0.2818 | -0.1921 | 0.7537  | 0.2496  | 0.4939  | 0.4782  | x |
| PE 18:4_22:6   | 0.4358  | 0.3866  | 0.6049  | 0.4268  | -0.1772 | -1.4680 | -1.4656 | -0.4685 | x |
| PE 19:0_22:6   | 0.2016  | -0.3410 | 0.3978  | 0.1987  | -0.7109 | -0.4537 | -0.5159 | -1.1277 | x |
| PE 20:0_22:6   | 0.5682  | 0.5161  | 0.1893  | 0.5501  | -0.6628 | -0.8789 | -1.0105 | -1.5194 | x |
| PE 20:0_22:6_1 | 0.3580  | 0.3070  | 0.2793  | 0.1848  | -0.6430 | -0.7141 | -0.9892 | -0.6689 | x |
| PE 20:1_20:4   | -0.0032 | -0.0891 | -0.1685 | -0.2302 | 0.8704  | 0.8060  | 0.7770  | -0.0433 |   |
| PE 20:4_22:6   | 0.1128  | -0.1210 | -0.0741 | 0.0650  | -0.4653 | -0.7347 | -0.6753 | -0.6729 | x |
| PE 20:4_24:4   | -0.4307 | 0.2192  | -0.6100 | -0.5169 | 1.0857  | 0.8806  | 0.9949  | 0.9681  |   |
| PE 20:5_22:6   | 0.5073  | 0.4968  | 0.5444  | 0.5107  | -1.2537 | -1.1392 | -1.1892 | -1.2597 | x |
| PE 22:4_22:6   | 0.2082  | 0.1232  | 0.1242  | 0.1102  | -0.5047 | -0.8475 | -0.7333 | -0.7607 | x |
| PE 22:5_22:6   | 0.1239  | 0.1393  | -0.0401 | -0.0426 | -0.9640 | -1.2276 | -1.1476 | -1.1306 | x |

|                |         |         |         |         |         |         |         |         |   |
|----------------|---------|---------|---------|---------|---------|---------|---------|---------|---|
| PE 22:5_22:6_1 | 0.4825  | 0.4423  | 0.4081  | 0.4108  | -0.7936 | -1.0484 | -0.9331 | -0.9494 | x |
| PE 22:6_22:6   | 0.6560  | 0.6304  | 0.6203  | 0.6099  | -1.4268 | -1.5671 | -1.5223 | -1.5640 | x |
| PE 24:4_22:6   | -0.5242 | -0.6149 | -0.5036 | -0.3320 | 0.5978  | 0.1916  | 0.2479  | 0.3353  | x |
| PE 36:4        | -0.2511 | -0.4038 | -0.2700 | -0.3085 | 0.9506  | 0.6875  | 0.5029  | 0.8044  |   |
| PE 36:5        | -0.0994 | -0.9930 | 0.0591  | -0.1764 | 0.7672  | 0.8023  | 0.6633  | 0.5924  |   |
| PE 37:6        | 0.2025  | -0.2130 | 0.2814  | -0.0412 | -0.0847 | -0.4553 | -0.6076 | -0.3967 |   |
| PE 38:7_1      | 0.3280  | 0.3930  | 0.6294  | 0.3069  | -0.1682 | -0.4834 | -0.3648 | -1.9455 |   |
| PE 39:6        | -0.2073 | 0.2000  | 0.2645  | 0.2912  | -0.1868 | -0.5461 | -0.8498 | -0.6173 |   |
| PE 39:7        | 0.4696  | -0.1284 | -0.0060 | 0.3140  | -0.2620 | -0.7378 | -0.4100 | -0.4331 |   |
| PE 40:4        | -0.4634 | -0.6873 | -0.1833 | -0.3521 | 0.6086  | 0.2730  | 0.3637  | 0.3107  |   |
| PE 40:7        | -0.3782 | -0.4477 | -0.4678 | -0.4412 | 0.9635  | 0.9437  | 0.9494  | 0.6743  |   |
| PE 40:7_1      | 0.5014  | 0.4233  | 0.5413  | 0.4775  | -1.0114 | -1.3064 | -1.1616 | -1.3077 |   |
| PE 42:6        | -0.5062 | -0.7766 | -0.3133 | -0.4066 | 0.8925  | 0.4469  | 0.6102  | 0.5726  |   |
| PE 42:7        | -0.4329 | -0.4893 | -0.5055 | -0.4839 | 1.8946  | 0.4048  | 0.8383  | 0.8613  |   |
| PE 42:9        | 0.1582  | 0.0069  | 0.0686  | 0.0409  | -0.3395 | -0.3923 | -0.5590 | -0.4786 |   |
| PE 44:7        | -0.4367 | -0.4957 | -0.5127 | -0.4901 | 1.3647  | 0.4394  | 1.1841  | 1.0501  |   |
| PG 14:0_16:0   | -0.2491 | -0.3752 | -0.1495 | -0.4721 | 0.8647  | 0.3214  | 0.4873  | 0.4169  |   |
| PG 16:0_16:0   | -0.4114 | -0.4135 | 0.1678  | -0.3991 | 0.4644  | 0.3216  | 0.5736  | 0.4451  |   |
| PG 16:0_20:4   | 0.2935  | -0.1850 | 0.5165  | 0.0448  | -0.3528 | -0.2690 | -0.5564 | -0.4524 |   |
| PG 16:0_22:6   | 0.3658  | 0.3978  | 0.4713  | 0.4252  | -0.7783 | -1.0119 | -0.9372 | -1.1159 | x |
| PG 18:0_22:6   | 0.3488  | 0.1724  | 0.5740  | 0.1617  | -0.3840 | -1.2783 | -0.3206 | -0.3394 | x |
| PG 18:1_18:1   | -1.6144 | -0.4732 | -0.2288 | -0.0329 | 1.3617  | 1.0234  | 1.2092  | 0.9829  |   |
| PG 18:1_20:3   | -0.3934 | -0.3768 | -0.1917 | -0.2535 | 0.8703  | 0.7220  | 0.7188  | 0.4868  |   |
| PG 18:1_20:4_1 | 0.0323  | -0.1501 | -0.0523 | -0.1220 | 0.7929  | 0.5871  | 0.7140  | 0.5194  |   |
| PG 18:1_22:4   | -0.2923 | -0.4889 | 0.1141  | 0.3401  | 0.6112  | 0.8201  | 0.5430  | 0.3114  |   |
| PG 18:1_22:6   | 0.1321  | -0.2171 | 0.3351  | 0.2513  | -0.4604 | -0.7099 | -0.6626 | -0.7259 | x |
| PG 18:2_18:2   | -0.1492 | -0.6893 | 0.0049  | -0.2408 | 0.9025  | 0.8592  | 0.8249  | 0.6843  |   |
| PG 18:2_20:3   | -0.1481 | -0.1168 | 0.0710  | -0.1816 | 0.8547  | 0.5939  | 0.6520  | 0.5046  |   |

|                 |         |         |         |         |         |         |         |         |   |
|-----------------|---------|---------|---------|---------|---------|---------|---------|---------|---|
| PG 18:2_22:6    | 0.4620  | 0.2316  | 1.0120  | 0.2071  | -0.3243 | -0.4663 | -0.5369 | -0.5427 | x |
| PG 20:4_22:5    | -0.2636 | -0.2023 | 0.0016  | -0.1518 | -0.4496 | -0.8828 | -0.6089 | -0.5286 |   |
| PG 20:4_22:6    | 0.3823  | 0.3140  | 0.2807  | 0.3247  | -0.5967 | -0.6492 | -0.7277 | -0.8716 | x |
| PG 22:4_22:4    | -0.9642 | -0.5547 | -0.0440 | -0.8447 | 0.6490  | 0.3097  | 0.7191  | 0.4167  |   |
| PG 22:5_22:5    | -0.3726 | -0.3976 | -0.2789 | -0.3305 | -0.6974 | -0.5811 | -0.8765 | -0.8166 |   |
| PG 22:5_22:6    | 0.0425  | -0.0902 | -0.0442 | 0.0295  | -0.9399 | -0.9182 | -0.8314 | -0.7928 | x |
| PG 22:6_22:6    | 0.6573  | 0.6157  | 0.6212  | 0.6026  | -1.2499 | -1.5867 | -1.4388 | -1.4651 | x |
| PI 16:0_22:6    | 0.3948  | 0.2879  | 0.9125  | 0.2750  | -0.8051 | -0.9429 | -0.9402 | -0.9246 | x |
| PI 18:0_20:3_1  | -0.2009 | -0.3744 | 0.2951  | -0.5454 | 0.8391  | 0.3614  | 0.5393  | 0.4789  |   |
| PI 18:0_22:6    | 0.3203  | 0.2707  | 0.8772  | 0.1038  | -0.4751 | -1.2123 | -0.9142 | -0.9212 | x |
| PI 20:4_22:6    | 0.3036  | 0.1903  | 0.6073  | 0.1162  | -0.8309 | -0.9663 | -0.9637 | -0.9484 | x |
| PMeOH 16:0_22:6 | 0.5550  | -0.2718 | 0.2460  | 0.4841  | -0.6044 | -0.7404 | -1.2292 | -0.7265 | x |
| PS 18:0_18:2    | -1.9018 | -1.1466 | -0.5249 | -0.8615 | 0.9467  | 0.1532  | 0.8361  | 0.8873  |   |
| PS 18:0_20:3    | 0.0789  | -0.0447 | 0.0460  | 0.1323  | -0.1861 | -0.6059 | -0.4285 | -0.4840 |   |
| PS 18:0_22:4    | -0.1774 | -0.8334 | 0.1732  | -0.6221 | 0.9291  | 0.1009  | 0.5139  | 0.6673  |   |
| PS 18:0_22:5    | -0.6445 | -1.3342 | -0.3111 | -1.6385 | 0.5946  | 0.2233  | 0.2860  | 0.3455  |   |
| PS 18:0_22:6    | 0.1694  | -0.0814 | 1.0150  | -0.0309 | -0.3391 | -0.9647 | -0.6551 | -0.6015 | x |
| PS 18:1_20:4    | -0.2056 | -0.4164 | 0.4163  | -0.6979 | 0.9048  | 0.4286  | 0.6068  | 0.2291  |   |
| PS 22:5_22:6    | 0.2919  | 0.3241  | 1.0463  | 0.2957  | -0.6777 | -0.9285 | -0.9197 | -0.8154 | x |
| PS 22:5_22:6_1  | 0.3154  | 0.0748  | 0.4425  | 0.2972  | -0.6438 | -1.0178 | -1.4243 | -1.1074 | x |
| PS 22:6_22:6    | 0.5265  | 0.4509  | 0.9173  | 0.4017  | -1.1892 | -1.4233 | -1.3927 | -1.2576 | x |
| PS 24:4_22:6    | -0.4906 | -0.6945 | 0.0094  | -0.6545 | 0.9115  | 0.5124  | 0.7393  | 0.8404  | x |
| PS 40:5         | -1.0499 | 0.2861  | -1.1074 | -0.0247 | 1.1027  | 1.0398  | 1.0545  | 0.9011  |   |
| SM d18:1_18:0   | 0.1230  | -0.0488 | 0.1159  | 0.0231  | -0.1076 | -0.4930 | -0.5207 | -0.4397 |   |
| SM d32:1        | -0.1514 | -0.3096 | 0.1126  | -0.0925 | 0.6498  | 0.1901  | 0.1794  | 0.4616  |   |
| SM d36:2        | -0.2460 | -0.3953 | 0.1656  | -0.0871 | 0.7298  | 0.3183  | 0.3340  | 0.3931  |   |
| SM d36:2_1      | -0.2309 | -0.4819 | -0.0177 | -0.3093 | 0.7954  | 0.6883  | 0.5968  | 0.7169  |   |
| SM d38:1        | 0.0411  | -0.1694 | 0.1932  | 0.0189  | -0.1159 | -0.5035 | -0.5452 | -0.5017 |   |



|                   |         |         |         |         |         |         |         |         |   |
|-------------------|---------|---------|---------|---------|---------|---------|---------|---------|---|
| SM d42:3          | 0.1552  | 0.1865  | -0.0055 | -0.0156 | -0.3918 | -0.7076 | -0.5691 | -0.5294 |   |
| TG 16:0_16:0_18:0 | -0.4270 | -0.4606 | -0.3981 | -0.1771 | 0.9891  | 0.5900  | 0.4335  | 0.5972  |   |
| TG 16:0_20:4_22:6 | 0.3477  | 0.2028  | 0.3332  | 0.3301  | -0.7367 | -1.1284 | -1.0023 | -0.7431 | x |
| TG 16:0_22:5_22:7 | 0.5889  | 0.5289  | 0.5490  | 0.5618  | -0.9248 | -1.1656 | -1.4617 | -1.7356 |   |
| TG 16:0_22:6_22:6 | 0.6045  | 0.5467  | 0.5675  | 0.5894  | -0.8445 | -1.0806 | -1.8820 | -1.6280 | x |
| TG 18:0_22:6_22:6 | 0.3247  | 0.2372  | 0.3575  | 0.3212  | -0.7757 | -0.9214 | -0.9186 | -0.9022 | x |
| TG 22:6_22:6_22:6 | 0.3481  | 0.2555  | 0.2833  | 0.3406  | -1.0320 | -1.0576 | -0.9371 | -0.7803 | x |
| TG 50:0           | -0.4326 | -0.4509 | -0.4032 | -0.1839 | 0.9768  | 0.5795  | 0.5072  | 0.5867  |   |
| TG 52:6           | 0.4756  | 0.2630  | -0.0821 | 0.3562  | -1.3946 | -0.3742 | -0.5853 | -1.4980 |   |
| TG 56:6           | -0.6288 | -0.1558 | -0.3834 | -0.1896 | 0.5807  | 0.2544  | 0.3696  | 0.0405  |   |
| TG 56:7           | 0.4486  | 0.1423  | 0.2677  | 0.3341  | -0.3023 | -0.9189 | -1.3539 | -1.0698 |   |
| TG 58:10          | 0.3491  | 0.2045  | 0.3276  | 0.3316  | -0.7334 | -1.1244 | -1.0181 | -0.7397 |   |
| TG 58:7           | 0.3655  | 0.3655  | 0.4022  | 0.2714  | -1.3443 | -1.3746 | -0.4628 | -0.2387 |   |
| TG 60:10          | 0.2130  | -0.2696 | 0.2013  | 0.2563  | -0.6236 | -1.0481 | -1.0174 | -0.5810 |   |
| TG 60:11          | -0.0852 | 0.2152  | 0.2319  | 0.1222  | -1.0130 | -1.9195 | -0.8397 | -0.6289 |   |
| TG 60:11_1        | 0.5571  | 0.3571  | 0.5505  | 0.2564  | -0.7961 | -1.2089 | -0.4957 | -0.7650 |   |
| TG 62:12          | 0.5592  | 0.5035  | 0.5820  | 0.5640  | -1.0537 | -0.7356 | -1.8469 | -1.8367 |   |
| TG 62:13          | 0.5258  | 0.4654  | 0.4687  | 0.4792  | -2.0014 | -1.3025 | -1.0720 | 0.1379  |   |

Red denotes upregulation, blue denotes downregulation.

**Supplementary Table 8: Significantly-Altered Lipids in *Tmem135*<sup>FUN025/FUN025</sup> (*FUN025*) Hearts Compared to WT.**

| Lipid Species       | Normalized Log10 Lipid Concentrations |         |         |         |                 |                 |                 |                 | Contains DHA |
|---------------------|---------------------------------------|---------|---------|---------|-----------------|-----------------|-----------------|-----------------|--------------|
|                     | WT 1                                  | WT 2    | WT 3    | WT 4    | <i>FUN025</i> 1 | <i>FUN025</i> 2 | <i>FUN025</i> 3 | <i>FUN025</i> 4 |              |
| CE 20:4             | 0.2517                                | 0.3937  | 0.6052  | 0.2445  | -1.0339         | -0.0891         | -0.6064         | -0.4373         |              |
| CE 22:6             | 0.6773                                | 0.6948  | 0.5588  | 0.7370  | -1.2261         | -1.1880         | -1.2241         | -0.2933         | x            |
| Cer_NS d18:1_17:0   | 0.2929                                | 0.5240  | 0.8362  | 0.7754  | -0.3708         | -0.2759         | -0.2416         | -0.3365         |              |
| Cer_NS d18:1_26:0   | 0.0741                                | 0.5680  | 0.6043  | -0.0146 | -0.4459         | -0.4403         | -0.4742         | -0.2195         |              |
| Cer_NS d18:2_18:0   | 0.2090                                | 0.3984  | 0.6488  | 0.7574  | -0.2090         | -0.2235         | -0.0828         | -0.3236         |              |
| Cer_NS d18:2_18:0_1 | 0.2090                                | 0.3984  | 0.6487  | 0.7574  | -0.2089         | -0.2234         | -0.0827         | -0.3235         |              |
| Cer_NS d18:2_19:0   | 0.3003                                | 0.4790  | 0.6066  | 0.7574  | -0.9169         | -1.1681         | -0.3625         | -0.4080         |              |
| Cer_NS d37:1        | 0.1706                                | 0.6418  | 0.8063  | 0.5630  | -0.7079         | -0.1284         | -0.1498         | -0.0027         |              |
| Cer_NS d41:2        | 0.0967                                | 0.2343  | 0.4914  | 0.2147  | -1.3730         | -0.8127         | 0.1168          | -1.1787         |              |
| CL 68:6             | -0.3825                               | 0.1860  | 0.0596  | -0.0730 | 1.2600          | 0.1838          | 0.5783          | 0.8310          |              |
| CL 70:7             | 0.0396                                | -0.0748 | -0.0008 | -0.0944 | 1.1100          | 0.7933          | 0.5043          | 1.1422          |              |
| CL 70:8             | 0.0775                                | 0.1835  | 0.1473  | 0.0318  | 1.3527          | 0.9439          | 0.8584          | 1.1849          |              |
| CL 72:10            | 0.0146                                | -0.1884 | -0.0611 | -0.1724 | 1.1761          | 0.7964          | 0.5344          | 1.2471          |              |
| CL 72:8             | -0.0638                               | 0.0679  | -0.0887 | -0.3266 | 1.4443          | 0.4444          | 0.4247          | 1.0614          |              |
| CL 72:9             | -0.1527                               | 0.0245  | -0.0555 | -0.4524 | 1.0092          | 0.4260          | 0.2013          | 0.7004          |              |
| CL 74:11            | 0.0156                                | 0.0769  | -0.0308 | -0.1953 | 1.0703          | 0.3989          | 0.3526          | 0.8054          |              |
| CL 74:7_1           | 0.2340                                | -0.1386 | 0.1369  | 0.0725  | 0.0246          | -0.3933         | -0.5935         | -0.7328         |              |
| CL 76:11            | 0.5852                                | 0.5734  | 0.3939  | 0.6736  | -0.5222         | -0.6166         | -1.3361         | -0.5027         |              |
| DG 16:0_22:6        | 0.7857                                | 0.6227  | 0.5509  | 0.6520  | -1.9924         | -1.1431         | -1.0470         | -0.1976         | x            |
| DG 18:1_22:5        | 0.2562                                | 0.5822  | 0.5694  | 0.2552  | -1.0176         | -1.5075         | -1.3716         | -1.0701         |              |
| DG 18:2_20:4        | 0.7763                                | 0.6696  | 0.5909  | 0.6107  | -0.1588         | -0.6810         | -0.9198         | -0.2933         |              |
| DG 18:2_22:5        | 0.4512                                | 0.5593  | 0.5209  | 0.2772  | -1.1326         | -1.0658         | -1.9087         | -0.8285         |              |
| DG 18:2_22:6        | 0.7862                                | 0.7531  | 0.6584  | 0.3757  | -0.7261         | -0.9502         | -1.0605         | -1.0290         | x            |
| EtherPC 16:0e_20:4  | -1.0412                               | -0.9705 | -0.9300 | -0.0032 | 1.0005          | 0.8085          | 0.4377          | 1.1862          |              |
| EtherPC 16:0e_22:5  | 0.6144                                | 0.2642  | 0.3629  | 0.7501  | -0.0435         | -0.0997         | -0.0186         | -0.1915         |              |

|                      |         |         |         |         |         |         |         |         |   |
|----------------------|---------|---------|---------|---------|---------|---------|---------|---------|---|
| EtherPC 16:1e_18:1   | -0.1296 | -0.8817 | -0.8472 | -0.8823 | 0.8069  | 0.6194  | 1.5048  | 1.7250  |   |
| EtherPC 16:1e_18:2   | -0.8213 | -0.1282 | -0.5307 | -0.4321 | 0.4562  | 1.2838  | 1.3369  | 1.4548  |   |
| EtherPC 18:1e_22:6   | -0.8790 | 0.5727  | -0.7760 | -0.8142 | 0.7139  | 0.8278  | 0.9047  | 1.0711  | x |
| EtherPC 18:2e_22:5   | -2.0250 | -0.0931 | 0.1133  | -0.2835 | 0.6653  | 0.7643  | 0.6468  | 0.7933  |   |
| EtherPC 39:7e        | -0.7447 | -0.6907 | 0.0216  | -0.6912 | 1.7419  | 1.1377  | 1.0242  | 1.7805  |   |
| EtherPE 14:1e_20:4   | 0.4231  | 0.3646  | 0.3048  | 0.4945  | -0.3158 | -0.4872 | -0.4544 | -0.3831 |   |
| EtherPE 16:1e_16:0   | -0.3026 | -0.2622 | -0.2145 | -0.2464 | 0.9391  | 0.5807  | 0.5769  | 0.8284  |   |
| EtherPE 16:1e_16:1   | 0.1340  | -0.8383 | -0.3370 | 0.3645  | 1.0561  | 0.9660  | 0.9405  | 1.0718  |   |
| EtherPE 16:1e_18:1   | -0.0136 | -0.1836 | -0.1692 | 0.1950  | 0.8643  | 0.5590  | 0.5392  | 0.7186  |   |
| EtherPE 16:1e_18:2   | -0.4537 | -0.3402 | -0.3027 | -0.4302 | 1.1468  | 0.9622  | 0.9560  | 1.0936  |   |
| EtherPE 16:1e_18:3   | -0.1238 | -0.2556 | -0.2299 | -0.3637 | 1.0287  | 0.8512  | 0.8275  | 0.9573  |   |
| EtherPE 16:1e_20:1   | -0.0855 | -0.2179 | -0.2774 | 0.4747  | 0.8517  | 0.5585  | 0.4774  | 0.6855  |   |
| EtherPE 16:1e_22:3   | -0.1554 | -0.1924 | -0.2676 | -0.0980 | 1.1204  | 0.7114  | 0.8696  | 0.7577  |   |
| EtherPE 16:1e_22:4   | -0.0395 | 0.0622  | -0.0410 | 0.1251  | 0.6889  | 0.5434  | 0.3364  | 0.6536  |   |
| EtherPE 16:1e_22:5   | -0.1744 | 0.0622  | -0.0029 | -0.1518 | -0.4087 | -0.6338 | -0.8012 | -0.4188 |   |
| EtherPE 16:2e_20:4   | 0.5047  | 0.4011  | 0.5570  | 0.8593  | -0.7464 | -0.4654 | 0.5999  | -0.5785 |   |
| EtherPE 18:0e_18:2_1 | 0.0446  | 0.0753  | -0.1392 | -0.0219 | 0.6398  | 0.4941  | 0.4725  | 0.5832  |   |
| EtherPE 18:1e_16:0   | -0.7386 | -0.0724 | -0.1203 | 0.1291  | 0.9756  | 0.7655  | 0.6702  | 0.8621  |   |
| EtherPE 18:1e_18:2   | -0.6618 | 0.0964  | -0.0160 | 0.2046  | 0.7968  | 0.3854  | 0.3897  | 0.6678  |   |
| EtherPE 18:1e_22:3   | -0.7238 | -0.0611 | 0.3527  | -0.8888 | 1.2978  | 0.3919  | 0.1191  | 0.7554  |   |
| EtherPE 18:1e_22:5   | 0.1541  | 0.2566  | 0.1447  | 0.1709  | -0.6347 | -0.6109 | -1.8479 | -0.8658 |   |
| EtherPE 18:1e_22:5_1 | 0.4306  | 0.7535  | 0.5434  | 0.4841  | 0.0509  | -0.0150 | -0.6885 | -0.2545 |   |
| EtherPE 18:1e_22:6   | 0.5052  | 0.6953  | 0.6228  | 0.4972  | -0.8267 | -1.2947 | -1.3539 | -1.0075 | x |
| EtherPE 18:1e_22:6_1 | 0.5176  | 0.7089  | 0.7776  | 0.5066  | -0.6516 | -1.6511 | -1.0489 | -0.7565 | x |
| EtherPE 18:2e_18:2   | -0.4251 | -0.2880 | -0.2291 | -0.4634 | 1.0799  | 0.9218  | 0.8826  | 0.9995  |   |
| EtherPE 18:2e_22:5   | 0.0173  | 0.2300  | 0.2334  | -0.0899 | -0.5472 | -0.8319 | -0.6859 | -1.1756 |   |
| EtherPE 18:2e_22:6   | 0.6002  | 0.7768  | 0.7219  | 0.5925  | -1.0347 | -1.0110 | -1.0922 | -0.9131 | x |
| EtherPE 18:3e_18:2   | -0.3610 | -0.1238 | -0.1209 | -0.3917 | 0.9375  | 0.7567  | 0.6866  | 0.9111  |   |

|                    |         |         |         |         |         |         |         |         |   |
|--------------------|---------|---------|---------|---------|---------|---------|---------|---------|---|
| EtherPE 18:3e_20:4 | 0.0119  | -0.7481 | -0.2197 | -0.0418 | 0.9389  | 0.5926  | 0.5555  | 0.8916  |   |
| EtherPE 18:3e_22:6 | 0.5446  | 0.7007  | 0.6612  | 0.5696  | -0.2593 | -1.7816 | -0.8249 | -0.5413 | x |
| FA 16:0_1          | -0.3600 | -0.9209 | 0.3199  | -0.3740 | 1.0895  | 0.7489  | 0.7796  | 0.8850  |   |
| FA 18:0_1          | -0.1440 | 0.3094  | -0.0154 | -0.0483 | 1.0644  | 0.7813  | 0.5430  | 0.7133  |   |
| FA 18:1_1          | -0.4221 | -0.0398 | -0.0772 | -0.2780 | 1.2384  | 1.0476  | 0.9364  | 1.1057  |   |
| FA 18:1_3          | -0.4211 | -0.0369 | -0.0745 | -0.2763 | 1.2473  | 1.0558  | 0.9439  | 1.1139  |   |
| FA 18:2_1          | -0.9969 | -0.1784 | -0.4108 | -0.2844 | 1.0804  | 0.9482  | 0.9740  | 1.0917  |   |
| FA 18:2_3          | -0.1829 | 0.6355  | -0.1149 | -0.9035 | 0.8118  | 0.6528  | 1.4373  | 1.5375  |   |
| FA 18:2_5          | -0.4533 | -0.3633 | -0.3117 | -0.3641 | 0.9779  | 0.8462  | 0.7517  | 0.9430  |   |
| FA 18:2_6          | -0.4486 | -0.3574 | -0.3052 | -0.3583 | 1.0504  | 0.8173  | 0.7748  | 0.8266  |   |
| FA 18:2_8          | -0.9995 | -0.1801 | -0.4128 | -0.2862 | 1.0802  | 0.9478  | 0.9697  | 1.0930  |   |
| FA 20:1_1          | -0.4624 | -0.3750 | -0.3250 | -0.3759 | 1.0415  | 0.7515  | 0.8255  | 0.9985  |   |
| FA 22:4            | -0.0113 | 0.9043  | 0.9993  | 0.2881  | -0.8044 | -0.7168 | -0.8534 | -0.7866 |   |
| FAHFA 22:4_18:2    | 0.0541  | 0.5944  | 0.7422  | 0.4078  | -0.5510 | -0.5456 | -0.6993 | -0.3234 |   |
| FAHFA 22:5_20:4    | 0.0829  | 0.9680  | 1.0091  | 0.3650  | -0.5089 | -0.3036 | -0.5111 | -0.5419 |   |
| LPC 0:0/16:0       | -0.5634 | 0.0716  | 0.2331  | -0.2997 | 0.3994  | 0.5463  | 0.4106  | 0.4894  |   |
| LPC 0:0/16:1       | -0.7251 | -0.3958 | -0.0921 | -0.2970 | 0.4630  | 0.6804  | 0.5766  | 0.5749  |   |
| LPC 0:0/18:1       | -0.7583 | -0.0845 | 0.1774  | -0.2686 | 0.5741  | 0.6925  | 0.5417  | 0.5296  |   |
| LPC 0:0/18:2       | -0.7556 | -0.2336 | -0.0674 | -0.5345 | 0.8159  | 0.8967  | 0.7497  | 0.8380  |   |
| LPC 0:0/20:3       | -0.8803 | -0.3285 | 0.2385  | -0.0720 | 0.4655  | 0.8118  | 0.3888  | 0.6321  |   |
| LPC 0:0/20:4       | -0.1084 | 0.5230  | 0.6313  | 0.2717  | -0.7349 | -0.5846 | -0.8340 | -0.6225 |   |
| LPC 0:0/22:4       | -0.2427 | 0.4877  | 0.5446  | 0.0947  | -0.5851 | -0.3044 | -0.5845 | -0.5689 |   |
| LPC 0:0/22:5       | 0.2874  | 0.6275  | 0.6595  | 0.4124  | -1.6871 | -1.6598 | -1.6857 | -1.0321 |   |
| LPC 0:0/22:6       | 0.5691  | 0.9488  | 0.9729  | 0.7089  | -1.3883 | -1.2216 | -1.3509 | -2.0355 | x |
| LPC 16:0/0:0       | -0.2935 | 0.0861  | 0.2368  | -0.1960 | 0.5015  | 0.6588  | 0.4684  | 0.6409  |   |
| LPC 16:1/0:0       | -0.4051 | -0.1779 | -0.0024 | -0.3880 | 0.9323  | 1.0826  | 0.9262  | 0.9698  |   |
| LPC 18:1/0:0       | -0.3240 | 0.0859  | 0.2753  | -0.1833 | 0.5337  | 0.5931  | 0.5039  | 0.6156  |   |
| LPC 18:2/0:0       | -0.4255 | -0.0933 | 0.0074  | -0.4681 | 0.7800  | 0.8778  | 0.7849  | 0.8066  |   |

|                |         |         |         |         |         |         |         |         |   |
|----------------|---------|---------|---------|---------|---------|---------|---------|---------|---|
| LPC 19:0/0:0   | -0.2340 | 0.0690  | 0.0999  | -0.1882 | 0.3630  | 0.4594  | 0.1658  | 0.5805  |   |
| LPC 20:0/0:0   | -0.1852 | 0.0229  | -0.1181 | -0.0776 | 0.3918  | 0.6597  | 0.4462  | 0.7945  |   |
| LPC 20:1/0:0   | -0.3980 | 0.0032  | 0.1419  | -0.2497 | 0.6471  | 0.5955  | 0.3399  | 0.6859  |   |
| LPC 22:5/0:0   | 0.0611  | 0.7335  | 0.9483  | 0.3833  | -0.6376 | -0.5835 | -0.8721 | -0.7852 |   |
| LPC 22:5/0:0_1 | -0.0770 | 0.3663  | 0.3849  | 0.0515  | -0.9920 | -0.9510 | -0.9898 | -0.9813 |   |
| LPE 16:0       | -0.3298 | 0.0440  | -0.0175 | -0.2608 | 1.1315  | 0.7611  | 0.6848  | 0.8818  |   |
| LPE 16:1       | -0.1963 | 0.1081  | 0.0652  | -0.0426 | 1.2617  | 1.1026  | 0.9829  | 1.1264  |   |
| LPE 16:1_1     | -0.1958 | 0.1087  | 0.0658  | -0.0421 | 1.2627  | 1.1036  | 0.9759  | 1.1276  |   |
| LPE 17:0       | -0.2036 | 0.1361  | 0.2245  | -0.1426 | 1.0381  | 0.6946  | 0.6012  | 0.8951  |   |
| LPE 17:1       | -0.4963 | -0.4182 | -0.3735 | -0.4190 | 1.2170  | 1.0781  | 0.5496  | 1.1355  |   |
| LPE 18:0       | -0.2520 | 0.0801  | 0.0382  | -0.0593 | 0.9448  | 0.8481  | 0.5470  | 1.0609  |   |
| LPE 18:1       | -0.3345 | -0.1544 | -0.1093 | -0.3117 | 1.3035  | 1.0174  | 0.9087  | 1.0905  |   |
| LPE 18:2       | -0.6992 | -0.2027 | -0.1283 | -0.5137 | 1.2158  | 1.0716  | 0.9941  | 1.0950  |   |
| LPE 18:2_1     | -0.2409 | 0.0855  | 0.0516  | -0.2284 | 1.1485  | 0.9350  | 0.8624  | 1.1232  |   |
| LPE 19:0       | -0.1671 | 0.2083  | 0.0562  | -0.2406 | 0.9580  | 0.6794  | 0.6120  | 0.7857  |   |
| LPE 20:0       | -0.5922 | 0.4771  | -0.3417 | -0.9029 | 0.6305  | 0.3560  | 0.2808  | 1.2925  |   |
| LPE 20:0_1     | -0.8193 | 0.1562  | 0.0557  | -0.1615 | 1.0374  | 0.7817  | 0.6031  | 0.9052  |   |
| LPE 20:1       | -0.2876 | 0.0389  | 0.0115  | -0.3583 | 1.0304  | 0.7998  | 0.6281  | 0.8452  |   |
| LPE 20:3       | -0.1778 | 0.3266  | -0.1403 | -0.2869 | 0.8271  | 0.7292  | 0.5368  | 0.7316  |   |
| LPE 20:4       | -0.5683 | 0.0624  | 0.0192  | -0.2451 | 0.9702  | 0.9159  | 0.5984  | 0.9105  |   |
| LPE 20:4_1     | -0.5695 | 0.0613  | 0.0282  | -0.2463 | 0.9694  | 0.9150  | 0.5980  | 0.9095  |   |
| LPE 22:5       | -0.0304 | 0.4826  | 0.2699  | 0.1522  | -1.4159 | -0.5553 | -1.1809 | -0.5822 |   |
| LPE 22:5_2     | 0.2747  | 1.0184  | 0.8464  | 0.0435  | -0.5263 | 0.2601  | -0.2687 | -0.2343 |   |
| PC 14:0_22:6   | 0.6851  | 0.8409  | 0.9073  | 0.7017  | -0.6050 | -0.9988 | -1.2688 | -0.8553 | x |
| PC 15:0_22:5   | -0.4750 | -0.3929 | -0.3458 | -0.3937 | 0.6223  | 1.3075  | 1.1019  | 0.7316  |   |
| PC 16:0_18:1   | -0.3015 | -0.1488 | -0.0011 | -0.0676 | 0.5633  | 0.6589  | 0.5262  | 0.6209  |   |
| PC 16:0_18:1_1 | -0.1934 | -0.1647 | 0.1984  | -0.2164 | 0.6206  | 0.8225  | 0.6092  | 0.8939  |   |
| PC 16:0_18:2   | -0.5245 | -0.2825 | -0.1263 | -0.4458 | 0.7396  | 0.8233  | 0.7240  | 0.8317  |   |

|                |         |         |         |         |         |         |         |         |   |
|----------------|---------|---------|---------|---------|---------|---------|---------|---------|---|
| PC 16:0_20:3   | 0.3051  | 0.3177  | 0.4423  | 0.2773  | -1.0952 | -0.6560 | -0.3053 | -0.6383 |   |
| PC 16:0_20:4   | 0.2590  | 0.5360  | 0.5751  | 0.4187  | -0.7914 | -0.5251 | -0.8605 | -0.5820 |   |
| PC 16:0_22:4   | 0.0374  | 0.0409  | 0.0479  | 0.0398  | 0.6059  | 0.7981  | 0.8019  | 0.7987  |   |
| PC 16:0_22:5   | 0.3591  | 0.4949  | 0.4777  | 0.3404  | -1.5974 | -1.5479 | -0.9390 | -1.2528 |   |
| PC 16:0_22:6   | 0.7362  | 0.9134  | 0.8952  | 0.7254  | -1.4225 | -1.3720 | -1.5219 | -1.3011 | x |
| PC 16:1_16:1   | -0.3790 | -0.1256 | -0.4283 | -0.1961 | 0.8838  | 1.0131  | 0.7889  | 0.8780  |   |
| PC 16:1_18:2   | -0.4729 | -0.3437 | -0.0810 | -0.4275 | 1.1247  | 1.2485  | 1.1297  | 1.2087  |   |
| PC 17:0_18:2   | -0.1323 | 0.2653  | 0.1184  | -0.6438 | 0.9487  | 1.0052  | 0.8438  | 1.2162  |   |
| PC 17:1_20:1   | -0.9646 | -0.9166 | 1.1753  | -0.9170 | 1.3822  | 1.4525  | 1.3480  | 1.5271  |   |
| PC 17:1_22:6   | -0.1699 | 0.1285  | 0.1237  | -0.1037 | 0.9272  | 0.9627  | 0.9097  | 0.8844  | x |
| PC 18:0_18:2   | -0.4953 | -0.2786 | -0.1443 | -0.3509 | 0.8216  | 0.8904  | 0.6917  | 0.9181  |   |
| PC 18:0_20:3   | -0.5800 | 0.0351  | -0.0034 | -0.3098 | 0.5651  | 0.7509  | 0.2550  | 0.8121  |   |
| PC 18:0_20:3_1 | -0.0187 | 0.9591  | 0.3372  | 0.4432  | -1.0027 | -0.9626 | -1.0006 | -0.9922 |   |
| PC 18:0_20:4   | 0.3502  | 0.4777  | 0.5024  | 0.5441  | -0.9300 | -0.7486 | -1.0639 | -0.7408 |   |
| PC 18:0_22:4   | 0.2058  | 0.4690  | 0.5302  | 0.3773  | -1.0158 | -0.5069 | -0.8928 | -0.9668 |   |
| PC 18:0_22:5   | 0.3188  | 0.4681  | 0.4888  | 0.3635  | -1.4764 | -1.4378 | -1.7778 | -0.8951 |   |
| PC 18:0_22:5_1 | 0.4399  | 0.7531  | 0.7777  | 0.5603  | -0.8842 | -0.6940 | -1.0968 | -0.7484 |   |
| PC 18:0_22:6   | 0.7337  | 0.8885  | 0.8905  | 0.7912  | -1.4294 | -1.5924 | -1.5426 | -1.3205 | x |
| PC 18:1_18:2   | -0.5596 | -0.2402 | -0.1280 | -0.4145 | 0.8079  | 0.8809  | 0.8225  | 0.8499  |   |
| PC 18:1_20:1   | 0.9579  | 0.2760  | 0.8141  | 1.1949  | -0.6053 | 0.0918  | -0.5981 | -0.4072 |   |
| PC 18:1_22:5   | 0.3934  | 0.2914  | 0.1155  | -0.1044 | -0.8563 | -0.5633 | -0.9514 | -0.6564 |   |
| PC 18:2_18:2   | -0.5910 | -0.4219 | -0.2919 | -0.5252 | 0.9749  | 1.0552  | 0.9839  | 1.0929  |   |
| PC 18:2_18:3   | -0.3658 | -0.1648 | -0.5615 | -0.5297 | 0.5465  | 0.7014  | 0.5278  | 0.7904  |   |
| PC 18:2_20:4   | -0.7538 | -1.0585 | -0.1311 | 0.0270  | 0.7594  | 1.0005  | 0.8305  | 0.7214  |   |
| PC 18:2_22:5   | 0.3245  | 0.8128  | 0.8559  | 0.6164  | -0.4431 | -0.1576 | -0.4216 | -0.2099 |   |
| PC 18:2_22:6   | 0.6201  | 0.8553  | 0.8826  | 0.6277  | -1.3421 | -1.2163 | -1.2959 | -1.2307 | x |
| PC 19:0_18:2   | -0.5286 | -0.4058 | -0.1998 | -0.5432 | 0.6843  | 0.8416  | 0.6726  | 1.0163  |   |
| PC 19:0_20:3   | -0.0484 | 0.3168  | 0.3925  | 0.3095  | -0.3774 | -0.4772 | -0.5803 | -0.4379 |   |

|              |         |         |         |         |         |         |         |         |   |
|--------------|---------|---------|---------|---------|---------|---------|---------|---------|---|
| PC 19:0_20:4 | 0.2028  | 0.4630  | 0.2646  | 0.3080  | -0.6548 | -0.6190 | -0.9809 | -0.3360 |   |
| PC 19:0_22:5 | 0.3029  | 0.3111  | 0.2516  | 0.2554  | -1.0198 | -1.0467 | -1.8491 | -1.0173 |   |
| PC 19:0_22:6 | 0.6298  | 0.6806  | 0.7205  | 0.6055  | -2.1944 | -0.1260 | -1.4693 | -0.7937 | x |
| PC 20:1_22:6 | 0.4380  | 0.6933  | 0.5863  | 0.4890  | -0.8126 | -1.3068 | -1.0425 | -0.7334 | x |
| PC 20:3_22:6 | 0.6007  | 0.6897  | 0.7464  | 0.4475  | -0.9191 | -0.7577 | -1.1855 | -0.9237 | x |
| PC 22:4_22:6 | 0.6794  | 0.8738  | 0.8080  | 0.6351  | -0.5952 | -1.3619 | -1.3940 | -1.3869 | x |
| PC 22:5_22:6 | 0.0995  | 0.3978  | 0.1849  | 0.2164  | -0.9370 | -0.8926 | -0.9347 | -0.9254 | x |
| PC 22:6_22:6 | 0.3684  | 0.7815  | 0.7418  | 0.6349  | -0.9282 | -0.8842 | -0.9260 | -0.9167 | x |
| PC 29:0      | -0.3026 | -0.4174 | -0.4177 | -0.1943 | 1.0924  | 1.0979  | 0.9759  | 1.2198  |   |
| PC 31:0      | -0.5115 | -0.4735 | -0.4255 | -0.4140 | 1.1952  | 1.1671  | 1.0671  | 1.3409  |   |
| PC 33:0      | 0.2290  | 0.2315  | -0.5337 | -0.3179 | 0.7977  | 0.7533  | 0.4920  | 1.1059  |   |
| PC 33:1      | -0.3018 | 0.2814  | 0.0687  | -0.0177 | 0.8332  | 0.8720  | 0.7372  | 0.8573  |   |
| PC 33:2      | -0.4316 | -0.3923 | 0.0124  | -0.1540 | 0.7986  | 0.7617  | 0.5632  | 0.9137  |   |
| PC 34:2      | 0.3434  | -0.2522 | 0.2337  | -0.2601 | 0.8322  | 0.3999  | 0.9449  | 1.1552  |   |
| PC 34:3      | -0.0923 | -0.0546 | -0.0840 | 0.0106  | 0.7161  | 0.6766  | 0.5743  | 1.0336  |   |
| PC 34:4      | -0.8861 | -0.2696 | -0.1170 | -0.2561 | 1.0500  | 1.1224  | 1.1538  | 1.3402  |   |
| PC 35:2      | -0.1340 | -0.3208 | -0.1897 | -0.4293 | 0.7787  | 0.7882  | 0.5686  | 1.0187  |   |
| PC 35:3      | -0.2909 | -0.0544 | 0.4787  | -0.8956 | 0.5320  | 0.8235  | 0.8509  | 0.8811  |   |
| PC 35:4      | 0.1425  | -0.0740 | 0.0574  | -0.0515 | 0.5691  | 0.6249  | 0.5322  | 0.7021  |   |
| PC 37:6      | 0.6153  | 0.6695  | 0.5926  | 0.3283  | -0.5139 | -0.4657 | -0.8736 | -0.6235 |   |
| PC 38:4      | -0.0737 | 0.3768  | 0.4421  | 0.1911  | -0.5610 | -0.3766 | -0.7614 | -0.2991 |   |
| PC 38:7      | 0.6812  | 0.8386  | 0.8965  | 0.6763  | -1.3546 | -0.4294 | -1.0094 | -1.0949 |   |
| PC 38:7_2    | 0.7559  | 0.7676  | 0.8626  | 0.5916  | -0.8316 | -0.1720 | -1.6461 | -1.6389 |   |
| PC 39:5      | 0.5998  | 0.6902  | 0.5205  | 0.4475  | -1.2615 | -0.6581 | -1.9516 | -0.7592 |   |
| PC 39:5_1    | 0.2122  | 0.3792  | 1.0813  | 0.4571  | -0.2771 | -0.3182 | -0.3571 | -0.3603 |   |
| PC 39:6      | 0.7547  | 0.7861  | 0.8891  | 0.7539  | -0.8339 | -0.9463 | -1.5482 | -0.8317 |   |
| PC 40:7      | 0.4908  | 0.6098  | 0.6468  | 0.4834  | -1.5877 | -1.0952 | -1.1913 | -1.0553 |   |
| PC 40:9      | 0.6620  | 0.6969  | 0.5319  | 0.5980  | -0.7646 | -0.9980 | -1.8546 | -0.9771 |   |

|                |         |         |         |         |         |         |         |         |   |
|----------------|---------|---------|---------|---------|---------|---------|---------|---------|---|
| PC 42:10       | 0.6187  | 0.8290  | 0.7857  | 0.7721  | -1.6142 | -0.8980 | -1.6127 | -1.6066 |   |
| PC 42:4        | 0.2405  | 0.3091  | -0.0749 | -0.0067 | -0.0579 | -1.7559 | -0.7159 | -0.8205 |   |
| PC 42:5_1      | -0.3556 | 0.0335  | 0.4772  | -0.2162 | -1.0777 | -0.3899 | -0.7269 | -0.9854 |   |
| PC 42:6        | 0.2748  | 0.2841  | 0.5121  | 0.4255  | -0.7161 | -0.6087 | -1.2962 | -0.3708 |   |
| PC 42:6_1      | 0.4770  | 0.5984  | 0.5589  | 0.3438  | -1.3533 | -0.8759 | -1.4140 | -1.0402 |   |
| PC 42:8_1      | 0.1728  | 0.7722  | 0.5890  | 0.5691  | -1.8863 | -0.7449 | -1.0523 | -0.3588 |   |
| PE 14:0_16:0   | -0.4295 | -0.1746 | -0.1223 | -0.2798 | 0.7715  | 0.3664  | 0.3388  | 0.5559  |   |
| PE 14:0_18:2   | -0.3529 | -0.1217 | -0.1878 | -0.5974 | 1.0321  | 1.0278  | 0.9787  | 0.9442  |   |
| PE 14:0_22:6   | 0.6550  | 0.7662  | 0.6748  | 0.5907  | 0.0673  | -1.7120 | -0.7317 | -0.0089 | x |
| PE 15:0_18:2   | -0.8582 | -0.7963 | -0.7608 | -0.0141 | 1.1769  | 1.1261  | 1.0898  | 1.3013  |   |
| PE 15:0_22:6   | 0.8384  | 0.7739  | 0.8096  | 0.7478  | -1.4838 | -1.4522 | -1.4821 | -0.7287 | x |
| PE 16:0_16:1   | -0.2703 | -0.2457 | -0.1058 | -0.0166 | 0.9677  | 0.7019  | 0.7441  | 0.8790  |   |
| PE 16:0_18:1   | -0.2555 | -0.2651 | -0.2450 | -0.0708 | 1.1104  | -0.0632 | 0.7810  | 0.6037  |   |
| PE 16:0_18:1_1 | -0.1002 | -0.1648 | -0.4212 | -0.1597 | 0.9707  | 1.0658  | 0.9120  | 0.9272  |   |
| PE 16:0_18:2   | -0.5654 | -0.3766 | -0.3569 | -0.5494 | 1.1451  | 0.9632  | 0.9821  | 1.0460  |   |
| PE 16:0_20:3   | 0.0353  | -0.0241 | -0.0497 | 0.2084  | 0.7331  | 0.4295  | 0.4244  | 0.6487  |   |
| PE 16:0_20:4   | -0.2939 | -0.0662 | -0.0727 | -0.2315 | 0.8178  | 0.6601  | 0.5904  | 0.7643  |   |
| PE 16:0_22:5   | 0.1152  | 0.3586  | 0.3049  | 0.0952  | -0.9523 | -0.9090 | -0.9500 | -0.9409 |   |
| PE 16:0_22:6   | 0.5769  | 0.7743  | 0.7012  | 0.5630  | -1.1358 | -1.1447 | -1.3054 | -1.0450 | x |
| PE 16:1_18:2   | -0.2113 | -0.4165 | -0.3178 | -0.2113 | 1.2228  | 1.0961  | 1.0603  | 1.1455  |   |
| PE 16:1_20:4   | -0.2611 | -0.2089 | -0.2690 | -0.0957 | 1.1082  | 0.9906  | 0.8177  | 1.1170  |   |
| PE 16:1_22:6   | 0.5201  | 0.7730  | 0.7816  | 0.6493  | -0.4522 | -0.6791 | -0.9301 | -0.6561 | x |
| PE 16:2_18:2   | -0.4565 | -0.3674 | -0.3163 | -0.3682 | 0.9960  | 0.7819  | 0.8179  | 0.9575  |   |
| PE 17:0_18:2   | -0.5968 | -0.4558 | -0.3597 | -0.4386 | 1.2072  | 1.0749  | 1.0441  | 1.1509  |   |
| PE 17:0_20:4   | -0.1052 | 0.2247  | 0.1011  | -0.0642 | 0.8977  | 0.7356  | 0.5501  | 0.8917  |   |
| PE 17:0_22:5   | 0.1731  | 0.3838  | 0.0107  | 0.3643  | -0.5998 | -0.5654 | -0.6010 | -0.7157 |   |
| PE 17:0_22:6   | 0.7930  | 0.8721  | 0.8417  | 0.6563  | -1.5909 | -1.5615 | -1.5894 | -0.8866 | x |
| PE 17:1_18:2   | 0.1101  | -0.5223 | -0.4064 | -0.4859 | 1.0603  | 0.9430  | 0.7649  | 1.0382  |   |



|                |         |         |         |         |         |         |         |         |   |
|----------------|---------|---------|---------|---------|---------|---------|---------|---------|---|
| PE 17:1_22:6   | 0.6842  | 0.7932  | 0.7679  | 0.6975  | -0.7429 | -0.7425 | -0.6979 | -0.5099 | x |
| PE 18:0_18:1   | 0.0653  | -0.2972 | -0.1894 | 0.3478  | 0.6003  | 0.2965  | 0.4782  | 0.4671  |   |
| PE 18:0_18:1_1 | -0.4078 | -0.1682 | -0.0854 | -0.3438 | 0.7937  | 0.6601  | 0.6592  | 0.7142  |   |
| PE 18:0_18:2   | -0.4844 | -0.3104 | -0.3396 | -0.5264 | 1.1870  | 0.8879  | 0.8989  | 1.0164  |   |
| PE 18:0_18:2_1 | -0.4952 | -0.2341 | -0.1320 | -0.5501 | 0.7216  | 0.7715  | 0.5770  | 0.7193  |   |
| PE 18:0_18:2_2 | -0.7995 | -0.7564 | -0.7316 | -0.7568 | 2.8648  | 2.7056  | -0.0409 | -0.0430 |   |
| PE 18:0_20:3   | -0.1017 | -0.2033 | -0.4522 | -0.0618 | 0.5829  | 0.7303  | 0.5296  | 0.9129  |   |
| PE 18:0_20:3_1 | -0.4617 | -0.2384 | -0.4473 | -0.3870 | 1.2446  | 0.9573  | 0.7453  | 0.9699  |   |
| PE 18:0_20:4   | -0.1784 | 0.0555  | -0.0188 | -0.1152 | 0.8518  | 0.7019  | 0.4921  | 0.7651  |   |
| PE 18:0_20:4_1 | 0.0958  | 0.3794  | 0.3740  | 0.2005  | -0.4777 | -0.3806 | -0.2644 | -0.7700 |   |
| PE 18:0_20:4_3 | -0.1784 | 0.0554  | -0.0189 | -0.1152 | 0.8516  | 0.7029  | 0.4919  | 0.7650  |   |
| PE 18:0_22:5   | 0.1847  | 0.3455  | 0.2894  | 0.1516  | -1.0329 | -1.0745 | -1.1270 | -0.9572 |   |
| PE 18:0_22:5_1 | 0.7676  | 0.7983  | 0.8622  | 0.7489  | -0.4461 | -0.9064 | -0.2025 | -1.7619 |   |
| PE 18:0_22:6   | 0.5908  | 0.7629  | 0.7195  | 0.6132  | -0.9750 | -1.1011 | -1.2057 | -1.0454 | x |
| PE 18:0_22:6_1 | 0.3750  | 0.7196  | 0.7630  | 0.3230  | -0.1348 | -0.7163 | -0.6121 | -0.4134 | x |
| PE 18:0_22:6_3 | 0.3514  | 0.6936  | 0.7367  | 0.2997  | -0.1372 | -0.7323 | -0.6288 | -0.4315 | x |
| PE 18:1_18:2   | -0.5215 | -0.4288 | -0.3972 | -0.5170 | 1.2680  | 1.1179  | 1.0914  | 1.1684  |   |
| PE 18:1_18:2_1 | -0.2520 | -0.6632 | -0.0870 | -0.2691 | 1.0531  | 1.0704  | 0.9530  | 0.9972  |   |
| PE 18:1_20:3   | -0.1262 | 0.1789  | -0.0808 | 0.0289  | 0.7661  | 0.4980  | 0.4283  | 0.6547  |   |
| PE 18:1_20:4   | -0.3556 | -0.1600 | -0.1288 | -0.3537 | 1.0596  | 0.9877  | 0.8702  | 1.0212  |   |
| PE 18:1_22:5   | 0.0181  | 0.3366  | 0.2991  | 0.0599  | -0.4340 | -0.8397 | -0.9816 | -0.5814 |   |
| PE 18:1_22:6   | 0.5543  | 0.6577  | 0.6516  | 0.5789  | -0.8795 | -0.9391 | -1.1500 | -0.8991 | x |
| PE 18:1_22:6_2 | 0.5541  | 0.6571  | 0.6515  | 0.5788  | -0.8796 | -0.9392 | -1.1501 | -0.8992 | x |
| PE 18:2_18:2   | -0.4706 | -0.2821 | -0.2276 | -0.4944 | 1.1201  | 0.9299  | 0.9117  | 1.0646  |   |
| PE 18:2_18:2_1 | -0.4597 | -0.3713 | -0.3207 | -0.3722 | 0.8470  | 0.7672  | 0.9908  | 0.9815  |   |
| PE 18:2_18:3   | -0.6093 | -0.4297 | -0.3863 | -0.7913 | 1.1437  | 1.0314  | 0.9359  | 1.0878  |   |
| PE 18:2_20:2   | -0.5714 | -0.3723 | -0.1394 | -0.5445 | 0.8142  | 0.8752  | 0.8833  | 0.8659  |   |
| PE 18:2_20:4   | -0.1745 | -0.0009 | 0.0295  | -0.0427 | 0.8168  | 0.7651  | 0.5155  | 0.8418  |   |

|                |         |         |         |         |         |         |         |         |   |
|----------------|---------|---------|---------|---------|---------|---------|---------|---------|---|
| PE 18:2_22:5   | 0.4224  | 0.8856  | 0.7810  | 0.4226  | -0.5348 | -0.1976 | -0.4051 | -0.0973 |   |
| PE 18:2_22:6   | 0.6721  | 0.8229  | 0.7499  | 0.6228  | -0.8847 | -0.9521 | -1.0916 | -1.0613 | x |
| PE 18:3_20:4   | -0.1969 | -0.0330 | -0.1195 | -0.2131 | 1.2207  | 1.0731  | 0.9272  | 0.6433  |   |
| PE 18:3_22:6   | 0.5732  | 0.8605  | 0.7756  | 0.6854  | -1.4957 | -1.4640 | -0.7434 | -1.4874 | x |
| PE 19:0_18:2   | -0.4272 | -0.2630 | -0.4353 | -0.9170 | 0.9417  | 0.7908  | 0.7849  | 0.9844  |   |
| PE 19:0_18:2_1 | -0.1690 | -0.1282 | -0.3807 | -0.3778 | 0.6025  | 0.8784  | 0.8062  | 0.9229  |   |
| PE 19:0_20:3   | -0.4573 | -0.3986 | -0.1513 | -0.3006 | 0.5878  | 0.6029  | 0.1442  | 0.3802  |   |
| PE 19:0_20:4   | -0.4678 | -0.3348 | -0.2971 | -0.6640 | 0.7017  | 0.7911  | 0.6105  | 0.9652  |   |
| PE 19:0_22:6   | 0.5619  | 0.6772  | 0.3648  | 0.4521  | -0.9418 | -0.8974 | -0.9395 | -0.9302 | x |
| PE 19:1_18:2   | -0.0660 | -0.2873 | -0.1319 | -0.2073 | 0.5748  | 0.4422  | 0.4059  | 0.6841  |   |
| PE 20:0_18:2   | -0.5447 | -0.3416 | 0.0694  | -0.4579 | 0.8223  | 0.5837  | 0.4761  | 0.6006  |   |
| PE 20:0_18:2_1 | -1.1715 | -1.1189 | -1.0889 | -1.1194 | 1.3215  | 0.8390  | 1.0697  | 1.1847  |   |
| PE 20:0_20:4   | -0.5577 | -0.1310 | -0.2111 | -0.4300 | 0.8088  | 0.6785  | 0.6069  | 0.9451  |   |
| PE 20:0_20:4_1 | 0.0863  | 0.5690  | 0.3783  | 0.2509  | -0.4548 | -0.6521 | -0.8397 | -0.4718 |   |
| PE 20:0_22:5   | 0.1790  | 0.4574  | 0.5792  | 0.3196  | -1.7575 | -1.0081 | -0.7783 | -1.7496 |   |
| PE 20:0_22:5_1 | 0.4115  | 0.5619  | 0.5565  | 0.4693  | -0.8205 | -0.9439 | -1.3666 | -0.6986 |   |
| PE 20:0_22:6   | 0.4835  | 0.7220  | 0.6841  | 0.5067  | -0.6143 | -0.7221 | -0.8392 | -0.8649 | x |
| PE 20:0_22:6_1 | 0.4369  | 0.9271  | 0.6191  | 0.2884  | -1.0706 | -0.6621 | -1.3926 | -0.8271 | x |
| PE 20:1_20:4   | 0.2477  | 0.5408  | 0.5070  | 0.8746  | -1.3358 | -0.3307 | -0.6445 | -1.0174 |   |
| PE 20:1_22:5   | -0.0660 | 0.2381  | 0.0726  | -0.1039 | -0.2139 | -0.2173 | -0.7510 | -0.4995 |   |
| PE 20:1_22:6   | 0.5079  | 0.7128  | 0.6047  | 0.4798  | -0.3401 | -1.8182 | -0.6765 | -0.1545 | x |
| PE 20:2_22:6   | 0.1000  | 0.3430  | 0.6392  | 0.5725  | -0.7312 | -1.2852 | -0.1740 | -1.0081 | x |
| PE 20:2_22:6_1 | 0.5173  | 0.7935  | 0.7738  | 0.4882  | -1.0111 | -1.6833 | -0.7777 | -0.9383 | x |
| PE 20:3_22:6   | 0.6611  | 0.7735  | 0.7260  | 0.6593  | -1.7745 | -0.3069 | -0.3732 | -1.3467 | x |
| PE 20:4_22:6   | 0.5775  | 0.9167  | 0.7721  | 0.6812  | -0.6313 | -1.3882 | -1.4198 | -1.4128 | x |
| PE 21:0_18:2   | 0.0924  | -0.6723 | -0.6273 | 0.2064  | 0.8528  | 0.3899  | 0.8951  | 0.5057  |   |
| PE 21:0_20:4_1 | -0.7048 | -0.6359 | -0.5965 | -0.6366 | 0.3569  | 1.4200  | 0.6624  | 1.1130  |   |
| PE 22:4_22:6   | 0.6422  | 0.8179  | 0.8168  | 0.2130  | -0.9971 | -0.3427 | -0.7841 | -1.0473 | x |

|                |         |         |         |         |         |         |         |         |   |
|----------------|---------|---------|---------|---------|---------|---------|---------|---------|---|
| PE 22:5_22:6   | 0.6750  | 0.7278  | 0.8028  | 0.5590  | -1.2046 | -1.2005 | -1.2563 | -1.1930 | x |
| PE 22:6_22:6   | 0.7344  | 0.8799  | 0.9322  | 0.9375  | -1.0238 | -0.9862 | -1.0219 | -1.0140 | x |
| PE 24:0_18:2   | -0.4426 | -0.3148 | -0.4659 | -1.0079 | 0.2597  | 0.2699  | 0.3111  | 0.3526  |   |
| PE 32:0        | -0.2036 | -0.2286 | 0.0732  | -0.4604 | 0.2990  | 0.6746  | 0.7040  | 0.6469  |   |
| PE 38:1        | -0.1862 | -0.6149 | -0.0552 | -0.0224 | 0.5359  | 0.6339  | 0.5673  | 0.3959  |   |
| PE 38:3        | -0.6670 | -0.3968 | -0.0341 | -0.3868 | 0.5553  | 0.8871  | 0.8554  | 0.9125  |   |
| PE 38:7        | -0.5288 | -0.0282 | -0.2286 | -0.5643 | 0.5370  | 0.6994  | 0.5148  | 0.6947  |   |
| PE 39:7        | 0.5097  | 0.6532  | 0.6535  | 0.5493  | -0.9096 | -0.8678 | -0.6306 | -0.7208 |   |
| PE 40:9        | 0.3505  | 0.5716  | 0.5899  | 0.4832  | -0.8332 | -0.6066 | -0.9688 | -0.6461 |   |
| PE 40:9_1      | 0.1479  | 0.3682  | 0.0526  | 0.3595  | -0.3937 | -0.6176 | -0.9158 | -0.5411 |   |
| PE 42:10       | 0.4127  | 0.7490  | 0.7924  | 0.5715  | -0.7997 | -0.7110 | -0.9738 | -0.7239 |   |
| PE 42:10_1     | 0.6281  | 0.8470  | 0.8733  | 0.6321  | -1.3431 | -1.2163 | -1.3230 | -1.2118 |   |
| PE 42:9        | 0.4452  | 0.5463  | 0.5626  | 0.5567  | -0.9976 | -0.7168 | -0.9879 | -0.8362 |   |
| PG 16:0_16:0   | -0.2325 | 0.1731  | 0.1624  | -0.1580 | 0.9714  | 0.3020  | 0.3795  | 0.7584  |   |
| PG 16:0_18:2   | -0.3191 | 0.3223  | -0.0707 | -0.1717 | 0.5192  | 0.6257  | 0.0734  | 0.9356  |   |
| PG 16:0_22:6   | 0.6673  | 0.7621  | 0.5669  | 0.5908  | -0.4729 | -0.4978 | -1.4591 | -1.4510 | x |
| PG 16:1_18:2   | -0.0913 | 0.3806  | -0.1571 | -0.2658 | 1.1194  | 1.0229  | 0.9405  | 1.0834  |   |
| PG 16:1_18:2_1 | 0.0489  | 0.0757  | -0.0542 | 0.1213  | 1.0784  | 0.9591  | 0.9730  | 1.0591  |   |
| PG 16:2_18:2   | -0.4572 | -0.3688 | -0.3181 | -0.3696 | 0.9897  | 0.7829  | 0.7270  | 1.0641  |   |
| PG 18:1_18:2   | -0.1748 | -0.1117 | -0.1854 | -0.1381 | 0.8612  | 0.7797  | 0.6980  | 0.8807  |   |
| PG 18:1_20:4   | 0.5341  | 0.6347  | 0.4675  | 0.5742  | 0.1578  | -0.1774 | -0.5814 | 0.0423  |   |
| PG 18:1_20:4_1 | 0.4098  | 0.8650  | 0.9493  | 0.3588  | -0.4014 | -0.4163 | -0.4683 | -0.5270 |   |
| PG 18:1_22:6   | -0.2716 | 0.1507  | 0.5586  | 0.3470  | -0.8426 | -1.0522 | -1.8980 | -0.5334 | x |
| PG 18:2_18:2_1 | -0.1538 | -0.1118 | -0.0789 | -0.1495 | 0.7115  | 0.7439  | 0.5604  | 0.8127  |   |
| PG 18:2_20:4   | 0.4847  | 0.6147  | 0.6751  | 0.2279  | -0.4463 | -0.4993 | -0.5985 | -0.2170 |   |
| PG 18:2_22:6   | 0.5483  | 0.6382  | 0.5752  | 0.6265  | -0.9269 | -0.8821 | -0.9246 | -0.9152 | x |
| PG 20:4_22:5   | -0.2635 | 0.3162  | 0.3418  | 0.3519  | -1.0865 | -1.0497 | -1.0846 | -1.0769 |   |
| PG 20:4_22:6   | 0.5886  | 0.7529  | 0.6074  | 0.6473  | -0.9636 | -0.9213 | -0.9614 | -0.9526 | x |

|                   |         |         |         |         |         |         |         |         |   |
|-------------------|---------|---------|---------|---------|---------|---------|---------|---------|---|
| PG 22:4_22:5      | 0.2510  | 0.1745  | 0.0643  | 0.2013  | -0.9754 | -0.9343 | -0.9733 | -0.9647 |   |
| PG 22:5_22:5      | 0.1170  | -0.1691 | -0.1695 | -0.0554 | -1.0536 | -1.0186 | -1.0518 | -1.0445 |   |
| PG 22:5_22:6      | 0.2447  | 0.1483  | 0.1910  | 0.3934  | -0.9283 | -0.8840 | -0.9260 | -0.9167 | x |
| PI 16:0_18:2      | 0.2133  | -0.2829 | -0.3381 | 0.0321  | 0.9606  | 0.4961  | 0.4531  | 0.8630  |   |
| PI 18:0_18:1      | -0.0532 | -0.2308 | -1.2410 | 0.1328  | 1.3039  | 0.7691  | 0.8724  | 0.8254  |   |
| PI 18:0_18:2      | -0.0145 | -0.2805 | -0.3105 | -0.1618 | 1.1742  | 0.4608  | 0.5588  | 0.9871  |   |
| PI 18:0_20:3      | 0.0663  | -0.1804 | -0.1631 | -0.0843 | 1.1149  | 0.4125  | 0.4156  | 0.9553  |   |
| PI 18:0_22:5      | 0.2966  | 0.0352  | 0.0461  | 0.3173  | -0.6453 | -0.9992 | -1.1044 | -0.7144 |   |
| PI 18:0_22:5_1    | 0.9063  | 0.5956  | 0.4074  | 0.7387  | -0.1936 | -0.6999 | -0.6649 | -0.3865 |   |
| PI 18:0_22:6      | 0.9856  | 0.6712  | 0.5951  | 0.8276  | -0.9989 | -1.1085 | -1.1514 | -0.9544 | x |
| PI 18:1_18:2      | 0.2673  | -0.0701 | -0.2404 | 0.3928  | 1.2269  | 0.3652  | 0.0546  | 0.2526  |   |
| PMeOH 16:0_18:2   | 0.1670  | 0.2759  | -0.0369 | -0.1880 | 0.6176  | 0.5080  | 0.3476  | 0.7153  |   |
| PS 18:1_20:4      | 0.6711  | 0.7619  | 0.7866  | 0.6713  | 0.4232  | -0.5085 | -1.0669 | 0.1766  |   |
| SM d36:0          | -0.5420 | -0.4569 | -0.4081 | 1.0132  | 0.6332  | 0.8982  | 0.5977  | 0.7475  |   |
| SM d36:1          | -0.3976 | -0.3139 | -0.2659 | -0.3147 | 1.1420  | 0.7663  | 1.4732  | -0.3249 |   |
| SM d36:2          | -0.2582 | -0.2459 | -0.0207 | 0.1617  | 0.8988  | 0.6811  | 0.3479  | 0.6277  |   |
| SM d38:2          | -0.3085 | -0.1592 | -0.0127 | -0.0714 | 0.5508  | 0.6564  | 0.5067  | 0.6195  |   |
| SM d42:3          | -0.1396 | -0.3144 | -0.1498 | -0.0805 | 0.3552  | 0.5429  | 0.2665  | 0.5659  |   |
| TG 18:2_18:2_18:3 | 0.8644  | 0.2891  | 0.3691  | 0.7946  | -0.1241 | -0.0170 | -0.0450 | 0.0787  |   |
| TG 54:6           | 1.1179  | 0.5833  | 0.1241  | 0.6083  | -1.6421 | -0.7986 | -0.0061 | -1.6332 |   |
| TG 54:7           | 0.8674  | 0.2927  | 0.3711  | 0.7976  | -0.1201 | -0.0054 | -0.0411 | 0.0523  |   |
| TG 56:6           | 1.5009  | 0.4102  | 0.2407  | 1.3263  | -0.6878 | -1.4144 | 0.4933  | -0.4267 |   |
| TG 56:7           | 1.5728  | 0.4514  | 0.2667  | 1.3017  | -0.8052 | -0.4768 | -0.5827 | -0.7428 |   |
| TG 56:8           | 1.5667  | 0.5101  | -0.1861 | 1.3887  | -0.9802 | -0.7140 | 0.1391  | -1.7419 |   |
| TG 58:10          | 0.7112  | 0.5527  | 0.4935  | 0.5498  | -0.1663 | -0.0461 | -0.2949 | 0.0428  |   |
| TG 58:7           | 1.4181  | 0.6929  | 0.6490  | 1.1345  | -1.5391 | -0.7545 | -0.5597 | -0.5088 |   |
| TG 60:10          | 1.2130  | 0.7041  | 0.4635  | 0.8076  | -1.5661 | -0.7620 | -1.5645 | -0.6097 |   |
| TG 62:11          | 1.4068  | 0.5914  | -0.0960 | 1.1849  | -1.0561 | -1.0218 | -1.0543 | -1.0471 |   |

Red denotes upregulation, blue denotes downregulation.

**Supplementary Table 9: Significantly-Altered Lipids in *Tmem135*<sup>FUN025/FUN025</sup> (*FUN025*) Plasmas Compared to WT.**

| Lipid Species        | Log10 Lipid Concentrations |        |        |        |                 |                 |                 | Contains DHA |
|----------------------|----------------------------|--------|--------|--------|-----------------|-----------------|-----------------|--------------|
|                      | WT 1                       | WT 2   | WT 3   | WT 4   | <i>FUN025</i> 1 | <i>FUN025</i> 2 | <i>FUN025</i> 3 |              |
| ACar 14:0            | 3.6746                     | 3.8951 | 3.6231 | 3.6502 | 3.9707          | 4.0346          | 4.0298          |              |
| ACar 16:1            | 3.7186                     | 4.0175 | 3.6711 | 3.6500 | 4.1158          | 4.1444          | 4.1732          |              |
| ACar 18:1            | 4.4540                     | 4.5951 | 4.2476 | 4.2888 | 4.6184          | 4.6850          | 4.6510          |              |
| CE 16:1              | 5.4822                     | 5.4028 | 5.4981 | 5.3387 | 5.6588          | 5.6601          | 5.5911          |              |
| CE 18:1              | 6.0255                     | 6.0421 | 6.0759 | 5.9298 | 6.2972          | 6.3163          | 6.2954          |              |
| CE 18:3              | 5.3687                     | 5.3834 | 5.3816 | 5.6616 | 5.7845          | 5.7528          | 5.7727          |              |
| CE 20:3              | 5.8976                     | 5.8355 | 5.8043 | 5.8756 | 6.1101          | 6.0605          | 6.1179          |              |
| CE 20:4              | 7.1060                     | 7.1589 | 7.0898 | 7.1014 | 6.7627          | 6.7526          | 6.7662          |              |
| CE 22:5              | 5.2291                     | 5.2082 | 5.2820 | 4.9785 | 4.4017          | 4.3976          | 4.6113          |              |
| CE 22:6              | 6.4584                     | 6.5110 | 6.4166 | 6.5356 | 5.1825          | 5.1631          | 5.1842          | x            |
| Cer_ADS d39:0        | 4.2734                     | 4.3091 | 4.3155 | 4.2519 | 3.0664          | 3.7654          | 3.0664          |              |
| Cer_ADS d40:0        | 5.4088                     | 5.3957 | 5.3860 | 5.6277 | 5.2106          | 5.1162          | 5.1606          |              |
| Cer_AS d18:1_23:0    | 4.1443                     | 4.1183 | 4.2298 | 4.2012 | 3.2006          | 3.8995          | 3.2006          |              |
| Cer_BDS d22:0_16:0   | 4.0827                     | 4.3099 | 4.1632 | 4.3483 | 3.9333          | 3.8555          | 3.9170          |              |
| Cer_BDS d41:0        | 4.9186                     | 4.8722 | 4.8443 | 4.9623 | 4.5714          | 4.5830          | 4.5968          |              |
| Cer_NDS d18:0_16:0   | 4.1828                     | 4.1810 | 4.3565 | 4.1114 | 3.2726          | 3.2726          | 3.2726          |              |
| Cer_NDS d18:0_16:0_1 | 4.1828                     | 4.1810 | 4.3565 | 4.1114 | 3.2878          | 3.2878          | 3.2878          |              |
| Cer_NP t18:0_16:0    | 4.6689                     | 4.7109 | 4.7867 | 4.6693 | 4.4506          | 4.4746          | 4.4350          |              |
| Cer_NP t18:0_16:0_1  | 4.6700                     | 4.7109 | 4.7867 | 4.6693 | 4.4506          | 4.4746          | 4.4350          |              |
| Cer_NP t18:0_22:0    | 5.4088                     | 5.3957 | 5.3860 | 5.6277 | 5.2106          | 5.1162          | 5.1606          |              |
| Cer_NP t18:0_23:0    | 4.9186                     | 4.8722 | 4.8443 | 4.9623 | 4.5714          | 4.5830          | 4.5968          |              |
| EtherPE 14:1e_20:4   | 4.7502                     | 4.7165 | 4.7541 | 4.5643 | 3.9260          | 3.8268          | 3.9740          |              |
| EtherPE 16:0e_18:2   | 5.6412                     | 5.6123 | 5.5554 | 5.6876 | 5.7932          | 5.7560          | 5.8263          |              |
| EtherPE 16:0e_22:6   | 6.1717                     | 6.2094 | 6.0416 | 6.1235 | 5.0883          | 3.9062          | 4.7126          | x            |
| EtherPE 16:1e_18:1   | 5.2599                     | 5.1620 | 5.1928 | 5.2703 | 5.3359          | 5.3192          | 5.3640          |              |

|                       |        |        |        |        |        |        |        |   |
|-----------------------|--------|--------|--------|--------|--------|--------|--------|---|
| EtherPE 16:1e_18:2    | 6.0077 | 5.9656 | 5.9345 | 6.0725 | 6.1214 | 6.1176 | 6.1627 |   |
| EtherPE 16:1e_20:4    | 6.1758 | 6.2286 | 6.1565 | 6.2141 | 5.7485 | 5.7864 | 5.8518 |   |
| EtherPE 16:1e_22:5    | 5.8039 | 5.8010 | 5.7903 | 5.7354 | 5.2356 | 5.1744 | 5.3286 |   |
| EtherPE 16:1e_22:6    | 6.4351 | 6.4406 | 6.3791 | 6.3871 | 5.4206 | 5.4493 | 5.4868 | x |
| EtherPE 16:2e_22:6    | 5.0891 | 5.1241 | 5.0205 | 4.9000 | 4.3779 | 4.3437 | 4.4509 | x |
| EtherPE 18:0e_20:4    | 5.9114 | 5.9397 | 5.8684 | 6.0701 | 5.5841 | 5.5515 | 5.5229 |   |
| EtherPE 18:0e_22:4    | 5.5471 | 5.5899 | 5.6664 | 5.7387 | 5.3177 | 5.2416 | 5.2577 |   |
| EtherPE 18:0e_22:5    | 5.2085 | 5.3200 | 5.2196 | 5.5023 | 4.7333 | 4.7724 | 4.5468 |   |
| EtherPE 18:0e_22:6    | 6.2832 | 6.3271 | 6.1795 | 6.3493 | 5.0382 | 4.4823 | 5.0764 | x |
| EtherPE 18:1e_20:4    | 6.0152 | 5.6463 | 5.9595 | 6.1160 | 5.5870 | 5.3287 | 5.5836 |   |
| EtherPE 18:1e_22:6    | 6.1907 | 6.2613 | 6.1607 | 6.3124 | 4.9002 | 4.8729 | 4.9295 | x |
| EtherPE 18:2e_20:4    | 5.7479 | 5.7160 | 5.7241 | 5.7643 | 5.4751 | 5.3075 | 5.5951 |   |
| EtherPE 18:2e_22:6    | 5.7078 | 5.7004 | 5.6771 | 5.6571 | 4.6282 | 4.6353 | 4.7103 | x |
| FA 18:1_1             | 4.7528 | 4.5600 | 4.8062 | 4.7012 | 4.8678 | 4.9068 | 4.9053 |   |
| FA 22:4               | 4.9204 | 5.0348 | 5.1037 | 5.0347 | 4.5979 | 4.6734 | 4.6018 |   |
| HexCer_NDS d21:0_18:1 | 4.7650 | 4.8641 | 4.6627 | 4.8191 | 5.0383 | 4.9887 | 4.9909 |   |
| HexCer_NDS d40:1      | 5.6304 | 5.7773 | 5.5708 | 5.8099 | 5.9287 | 5.9225 | 5.9331 |   |
| HexCer_NDS d40:2      | 5.3008 | 5.3396 | 5.2392 | 5.3146 | 5.4755 | 5.4699 | 5.4562 |   |
| HexCer_NDS d41:2      | 4.8197 | 4.9289 | 4.8099 | 4.8252 | 5.1027 | 5.1333 | 5.0774 |   |
| HexCer_NDS d42:2      | 5.7022 | 5.7310 | 5.7015 | 5.7213 | 5.9610 | 5.9870 | 5.9721 |   |
| HexCer_NS d18:1_16:0  | 4.4513 | 4.4504 | 4.3733 | 4.4327 | 4.5927 | 4.6311 | 4.5389 |   |
| HexCer_NS d18:1_24:1  | 4.8837 | 4.8168 | 4.8615 | 4.8247 | 5.0777 | 5.1556 | 5.1140 |   |
| HexCer_NS d36:1       | 4.3393 | 4.4350 | 4.3712 | 4.3462 | 4.7334 | 4.7487 | 4.6908 |   |
| HexCer_NS d38:1       | 4.7916 | 4.9352 | 4.7539 | 4.8758 | 5.1293 | 5.0940 | 5.0842 |   |
| HexCer_NS d38:1_1     | 4.7916 | 4.9352 | 4.7539 | 4.8758 | 5.1293 | 5.0940 | 5.0842 |   |
| HexCer_NS d40:1       | 5.6081 | 5.7773 | 5.5708 | 5.8079 | 5.9287 | 5.9225 | 5.9331 |   |
| HexCer_NS d42:1       | 5.3564 | 5.4556 | 5.4049 | 5.3927 | 5.6536 | 5.6569 | 5.5766 |   |
| HexCer_NS d42:2       | 5.7022 | 5.7353 | 5.7015 | 5.7224 | 5.9610 | 5.9870 | 5.9821 |   |

|                |        |        |        |        |        |        |        |   |
|----------------|--------|--------|--------|--------|--------|--------|--------|---|
| LPC 0:0/18:0   | 5.3775 | 5.4158 | 5.4190 | 5.4670 | 5.3273 | 5.3444 | 5.3354 |   |
| LPC 0:0/18:1   | 5.3236 | 5.2630 | 5.3731 | 5.3310 | 5.5117 | 5.5173 | 5.5195 |   |
| LPC 0:0/20:4   | 5.1628 | 5.1636 | 5.2654 | 5.2368 | 4.7852 | 4.7783 | 4.7887 |   |
| LPC 0:0/22:2   | 3.7758 | 3.6194 | 3.7475 | 3.9595 | 2.9205 | 2.9205 | 2.9205 |   |
| LPC 0:0/22:5   | 3.8583 | 3.8910 | 4.1200 | 3.9030 | 3.1222 | 2.4802 | 3.3765 |   |
| LPC 16:1/0:0   | 5.2296 | 5.1273 | 5.1857 | 5.1373 | 5.3429 | 5.3872 | 5.3614 |   |
| LPC 17:0/0:0   | 4.8652 | 4.8236 | 4.8380 | 4.8290 | 4.4987 | 4.4370 | 4.4781 |   |
| LPC 18:0/0:0   | 6.5382 | 6.5727 | 6.5465 | 6.6577 | 6.4846 | 6.4833 | 6.4941 |   |
| LPC 18:1/0:0   | 6.3043 | 6.2116 | 6.3051 | 6.2242 | 6.3976 | 6.4247 | 6.4195 |   |
| LPC 19:0/0:0   | 5.0281 | 4.9704 | 4.9483 | 4.9013 | 4.6810 | 4.6075 | 4.7545 |   |
| LPC 20:0/0:0   | 5.1793 | 5.1961 | 5.1031 | 5.2786 | 4.9929 | 4.9492 | 5.0209 |   |
| LPC 20:0/0:0_1 | 4.2259 | 4.2393 | 4.3258 | 4.0803 | 3.9950 | 3.5807 | 3.9582 |   |
| LPC 20:1/0:0   | 5.2100 | 5.0713 | 5.1690 | 5.0455 | 4.9150 | 4.9474 | 4.9979 |   |
| LPC 20:3/0:0   | 5.4025 | 5.3040 | 5.4680 | 5.4261 | 5.5360 | 5.5729 | 5.5672 |   |
| LPC 20:4/0:0   | 6.0238 | 5.9671 | 6.0590 | 5.9984 | 5.5879 | 5.5715 | 5.5480 |   |
| LPC 22:0/0:0   | 4.5147 | 4.5055 | 4.5215 | 4.5610 | 4.3770 | 4.3725 | 4.3177 |   |
| LPC 22:1/0:0   | 4.4184 | 4.2796 | 4.4492 | 4.2505 | 3.9500 | 4.0169 | 4.1142 |   |
| LPC 22:4/0:0   | 4.2106 | 4.0253 | 4.3033 | 4.1807 | 3.8766 | 3.9071 | 3.9513 |   |
| LPC 22:5/0:0   | 4.5444 | 4.5086 | 4.7151 | 4.3366 | 3.7465 | 3.6866 | 3.6416 |   |
| LPC 22:5/0:0_1 | 4.4237 | 4.2808 | 4.5145 | 4.6194 | 4.0672 | 4.0335 | 3.8546 |   |
| LPC 22:6/0:0   | 5.5969 | 5.5742 | 5.6743 | 5.7032 | 4.1758 | 4.2852 | 4.1791 | x |
| LPC 23:0/0:0   | 4.0131 | 4.0125 | 4.0142 | 3.9579 | 3.8837 | 3.7075 | 3.8686 |   |
| LPC 24:0/0:0   | 4.6412 | 4.6476 | 4.6613 | 4.6955 | 4.5925 | 4.5498 | 4.5759 |   |
| LPE 18:0       | 4.0479 | 4.0537 | 4.1000 | 4.1948 | 3.8151 | 3.9681 | 3.8803 |   |
| LPE 18:1       | 5.5777 | 5.4165 | 5.6364 | 5.5467 | 5.7805 | 5.8194 | 5.7252 |   |
| LPE 18:2       | 5.8945 | 5.7946 | 6.0519 | 6.1178 | 6.3650 | 6.3595 | 6.2427 |   |
| LPE 18:2       | 4.0430 | 3.8635 | 4.1042 | 4.2025 | 4.3551 | 4.3554 | 4.2424 |   |
| LPE 20:0       | 4.6195 | 4.6572 | 4.5649 | 4.7636 | 4.2069 | 4.3265 | 4.4137 |   |



|                |        |        |        |        |        |        |        |   |
|----------------|--------|--------|--------|--------|--------|--------|--------|---|
| LPE 20:3       | 4.9567 | 4.8120 | 5.1305 | 4.9459 | 5.5351 | 5.5676 | 5.3512 |   |
| LPE 22:6       | 6.1852 | 6.1934 | 6.3736 | 6.3461 | 5.1892 | 5.2128 | 5.0334 | x |
| PC 15:0_18:2   | 5.5652 | 5.4409 | 5.5297 | 5.5891 | 5.3052 | 5.2649 | 5.3146 |   |
| PC 15:0_20:4   | 5.3581 | 5.2442 | 5.3173 | 5.3477 | 4.9871 | 5.0164 | 5.0764 |   |
| PC 15:0_22:6   | 5.2378 | 5.2572 | 5.2049 | 5.3155 | 4.8920 | 4.9295 | 4.9367 | x |
| PC 16:0_16:0   | 6.3608 | 6.2978 | 6.2542 | 6.3127 | 6.0867 | 6.0418 | 6.0621 |   |
| PC 16:0_18:0   | 5.6925 | 5.6578 | 5.5749 | 5.7679 | 5.2963 | 5.3476 | 5.3991 |   |
| PC 16:0_18:1   | 7.5071 | 7.4792 | 7.5572 | 7.5314 | 7.7690 | 7.7746 | 7.7737 |   |
| PC 16:0_18:3   | 2.6254 | 2.6254 | 2.6254 | 3.3240 | 3.7993 | 4.0530 | 4.1577 |   |
| PC 16:0_20:3   | 6.7783 | 6.7468 | 6.8324 | 6.8876 | 6.9812 | 6.9931 | 7.0254 |   |
| PC 16:0_20:4   | 7.5196 | 7.5115 | 7.5270 | 7.5267 | 6.9622 | 6.9271 | 6.9683 |   |
| PC 16:0_22:5   | 6.1040 | 6.0855 | 6.1665 | 6.1616 | 5.3963 | 5.4142 | 5.4840 |   |
| PC 16:0_22:6   | 7.1701 | 7.1961 | 7.1220 | 7.3050 | 5.6126 | 5.5824 | 5.6406 | x |
| PC 16:1_22:6   | 5.5084 | 5.5218 | 5.4999 | 5.5793 | 4.3964 | 3.9666 | 3.2047 | x |
| PC 17:0_18:2   | 6.0064 | 5.9619 | 5.9894 | 6.0899 | 5.7061 | 5.6449 | 5.7523 |   |
| PC 17:1_20:5   | 5.5819 | 5.5575 | 5.5670 | 5.7241 | 3.5279 | 4.4851 | 5.0583 |   |
| PC 18:0_18:1   | 6.6118 | 6.6111 | 6.6718 | 6.6744 | 6.8763 | 6.8877 | 6.8998 |   |
| PC 18:0_20:2   | 6.0498 | 6.0000 | 5.5316 | 6.1677 | 6.0447 | 6.0071 | 6.0826 |   |
| PC 18:0_20:3   | 6.4576 | 6.4488 | 6.4750 | 6.5582 | 6.6619 | 6.6642 | 6.7018 |   |
| PC 18:0_20:4   | 7.2582 | 7.3281 | 7.2986 | 7.3128 | 6.8029 | 6.7646 | 6.8118 |   |
| PC 18:0_22:6   | 6.5252 | 6.6308 | 6.5558 | 6.7204 | 5.1113 | 5.0344 | 5.1385 | x |
| PC 18:1_20:3_1 | 5.3419 | 5.2444 | 5.3404 | 5.3394 | 5.5480 | 5.5742 | 5.5681 |   |
| PC 18:1_20:4   | 6.9095 | 6.8343 | 6.8918 | 6.7730 | 6.3274 | 6.3017 | 6.3535 |   |
| PC 18:1_22:6   | 6.3382 | 6.2910 | 6.2636 | 6.2507 | 4.7755 | 4.7529 | 4.8227 | x |
| PC 18:2_20:4   | 6.2479 | 6.1512 | 6.0970 | 6.2425 | 5.8283 | 5.7687 | 5.8247 |   |
| PC 18:2_22:4   | 5.5118 | 5.3170 | 5.4226 | 5.4209 | 4.2539 | 5.0188 | 4.7387 |   |
| PC 18:2_22:6   | 5.6902 | 5.6571 | 5.6570 | 5.6720 | 4.6577 | 4.6083 | 4.7105 | x |
| PC 18:3_20:4   | 4.3846 | 4.5250 | 4.6603 | 5.0256 | 4.2666 | 3.5676 | 3.5676 |   |

|              |        |        |        |        |        |        |        |   |
|--------------|--------|--------|--------|--------|--------|--------|--------|---|
| PC 19:0_18:1 | 5.0712 | 5.0469 | 5.1921 | 4.8629 | 4.8141 | 4.8671 | 4.5546 |   |
| PC 19:0_18:2 | 5.9821 | 5.9376 | 5.9745 | 5.9434 | 5.7107 | 5.6321 | 5.7654 |   |
| PC 19:0_22:6 | 4.8582 | 4.9142 | 4.8803 | 4.9452 | 4.1537 | 4.1537 | 4.1537 | x |
| PC 20:0_20:4 | 4.4827 | 4.6097 | 4.6560 | 4.6243 | 4.7640 | 4.8471 | 4.7979 |   |
| PC 20:0_22:6 | 4.9074 | 4.9655 | 5.0204 | 5.2114 | 3.9614 | 3.9614 | 3.9614 | x |
| PC 20:1_20:4 | 5.9328 | 5.9469 | 5.9936 | 5.9503 | 5.4325 | 5.4435 | 5.4742 |   |
| PC 20:3_22:6 | 4.3324 | 4.2591 | 4.2338 | 4.3383 | 4.0237 | 4.0516 | 4.0299 | x |
| PC 20:4_22:5 | 4.7440 | 4.3313 | 4.2678 | 4.6546 | 3.7921 | 3.0932 | 3.0932 |   |
| PC 22:6_22:6 | 4.0787 | 4.0631 | 4.1842 | 4.1513 | 3.3063 | 3.3063 | 3.3063 | x |
| PC 34:4      | 4.9496 | 4.6831 | 4.7355 | 4.8692 | 4.5894 | 4.3582 | 4.1026 |   |
| PC 36:5      | 5.8685 | 5.7611 | 5.7936 | 5.6967 | 5.2919 | 5.3756 | 5.4080 |   |
| PC 36:5_1    | 5.5909 | 5.4997 | 5.5813 | 6.1254 | 5.2892 | 5.1995 | 5.1411 |   |
| PC 36:6      | 4.6115 | 4.5131 | 4.5590 | 4.6698 | 3.7719 | 3.7719 | 3.7719 |   |
| PC 37:3      | 5.1716 | 4.9706 | 5.1544 | 4.8920 | 4.6413 | 4.5679 | 4.8829 |   |
| PC 37:4      | 5.2299 | 5.1641 | 5.2290 | 4.9081 | 3.9921 | 4.5211 | 4.5899 |   |
| PC 38:7      | 4.5137 | 4.6367 | 4.8468 | 4.8520 | 3.8147 | 3.8147 | 3.8147 |   |
| PC 39:4      | 5.3820 | 5.4146 | 5.4218 | 5.2755 | 4.6282 | 4.4042 | 4.4587 |   |
| PC 39:4_1    | 5.0071 | 4.9341 | 4.8743 | 4.3518 | 3.9051 | 3.2062 | 3.2062 |   |
| PC 39:5      | 4.8392 | 4.8036 | 4.7723 | 4.6777 | 4.5188 | 4.4422 | 4.5227 |   |
| PC 39:6      | 5.2266 | 5.1855 | 5.1976 | 5.1969 | 4.3536 | 4.3536 | 4.3536 |   |
| PC 39:6_1    | 5.0497 | 5.0484 | 4.9884 | 5.1212 | 3.8987 | 3.9853 | 3.7186 |   |
| PC 39:7      | 4.6940 | 4.5290 | 4.5826 | 4.5448 | 3.3344 | 3.3344 | 3.3344 |   |
| PC 40:6      | 5.5161 | 4.9368 | 5.5171 | 5.3910 | 4.2076 | 3.1556 | 4.9416 |   |
| PC 40:9      | 4.3055 | 4.2140 | 4.0627 | 4.5530 | 2.7099 | 2.7099 | 2.7099 |   |
| PC 41:7      | 4.1704 | 4.0615 | 4.2621 | 3.3625 | 3.3625 | 3.3625 | 3.3625 |   |
| PC 42:1      | 4.0005 | 4.2057 | 4.3282 | 4.1348 | 3.8291 | 3.5495 | 3.7997 |   |
| PC 42:10     | 5.1939 | 5.1859 | 5.1763 | 5.1112 | 4.2810 | 4.2810 | 4.2810 |   |
| PC 42:5      | 4.7728 | 4.4459 | 4.6948 | 4.4139 | 3.3565 | 4.0555 | 3.3565 |   |

|                |        |        |        |        |        |        |        |   |
|----------------|--------|--------|--------|--------|--------|--------|--------|---|
| PC 42:5_1      | 4.2817 | 3.8861 | 3.7044 | 3.9420 | 3.0055 | 3.0055 | 3.0055 |   |
| PC 42:6        | 4.4822 | 4.3880 | 4.5618 | 4.4916 | 4.0677 | 4.0843 | 4.1741 |   |
| PC 42:7        | 5.1805 | 5.1485 | 5.1615 | 5.0939 | 4.3949 | 4.3949 | 4.3949 |   |
| PC 44:7        | 4.2011 | 3.7866 | 4.1188 | 3.8123 | 3.0877 | 3.0877 | 3.0877 |   |
| PE 15:0_22:6   | 4.9373 | 4.9015 | 4.8305 | 4.7972 | 3.0958 | 3.7948 | 3.8790 | x |
| PE 16:0_16:1   | 4.5575 | 4.4949 | 4.0288 | 4.4720 | 4.8598 | 5.0520 | 5.0905 |   |
| PE 16:0_18:0   | 4.9920 | 4.9405 | 4.8823 | 4.9224 | 4.7470 | 4.7442 | 4.6660 |   |
| PE 16:0_18:2   | 6.3479 | 6.2874 | 6.3038 | 6.3799 | 6.6562 | 6.6827 | 6.7011 |   |
| PE 16:0_20:4   | 6.3159 | 6.3592 | 6.2617 | 6.2959 | 6.4054 | 6.6216 | 6.7024 |   |
| PE 16:0_22:5   | 5.5171 | 5.4666 | 5.4829 | 5.5049 | 4.9424 | 4.9551 | 4.9759 |   |
| PE 16:0_22:6   | 6.7790 | 6.7616 | 6.6816 | 6.8166 | 5.4103 | 5.4495 | 5.4712 | x |
| PE 16:1_18:2   | 5.6664 | 5.5752 | 5.5007 | 5.6109 | 5.9503 | 6.0234 | 6.0476 | x |
| PE 16:1_22:6   | 5.0037 | 4.9419 | 4.7639 | 5.0671 | 3.2174 | 3.9164 | 4.1387 |   |
| PE 17:0_18:2   | 5.2447 | 5.2291 | 5.2700 | 5.3479 | 4.9767 | 5.0176 | 5.0715 | x |
| PE 17:0_20:4   | 4.9284 | 4.9236 | 4.8963 | 4.8844 | 4.3985 | 4.4285 | 4.3822 |   |
| PE 17:1_22:6   | 5.1576 | 5.0810 | 4.9787 | 5.0311 | 4.0682 | 4.0852 | 4.0456 |   |
| PE 18:0_16:1   | 4.8952 | 4.8437 | 4.9095 | 4.8921 | 5.1661 | 5.1495 | 5.1034 | x |
| PE 18:0_18:1   | 6.0462 | 6.0388 | 6.0856 | 6.0454 | 6.2761 | 6.2912 | 6.2728 |   |
| PE 18:0_20:4   | 6.8106 | 6.8589 | 6.8018 | 6.9170 | 6.6571 | 6.6340 | 6.6856 |   |
| PE 18:0_20:4_1 | 6.0832 | 6.0996 | 6.1048 | 6.1125 | 5.7860 | 5.7487 | 5.7720 |   |
| PE 18:0_22:5   | 5.0864 | 5.1174 | 5.0702 | 4.8110 | 4.3289 | 4.2814 | 4.2995 |   |
| PE 18:0_22:6   | 6.3423 | 6.4237 | 6.2953 | 6.4854 | 4.9331 | 4.8898 | 4.9170 |   |
| PE 18:0_22:6_1 | 5.9167 | 5.9641 | 5.9234 | 6.0111 | 4.1217 | 3.9076 | 3.5955 | x |
| PE 18:1_18:2   | 6.2679 | 6.1481 | 6.1630 | 6.2476 | 6.3702 | 6.3548 | 6.4741 | x |
| PE 18:1_18:2_1 | 5.2768 | 5.3834 | 5.2304 | 5.3687 | 5.5219 | 5.4982 | 5.5195 |   |
| PE 18:1_20:4_1 | 4.9914 | 4.9586 | 4.8177 | 4.8283 | 4.3434 | 4.3944 | 4.2323 |   |
| PE 18:1_22:6   | 6.3289 | 6.2439 | 6.1602 | 6.2477 | 4.9225 | 4.9002 | 4.9523 |   |
| PE 18:2_18:2   | 5.6392 | 5.5082 | 5.5048 | 5.7410 | 5.0316 | 4.8983 | 5.0781 | x |

|                |        |        |        |        |        |        |        |   |
|----------------|--------|--------|--------|--------|--------|--------|--------|---|
| PE 19:0_18:2   | 4.9259 | 4.8437 | 4.9423 | 4.9393 | 4.6111 | 4.6422 | 4.7517 |   |
| PE 19:0_20:4   | 4.8651 | 4.7516 | 4.7023 | 4.7053 | 4.3157 | 4.1805 | 4.3482 |   |
| PE 20:0_18:1   | 5.5056 | 5.4989 | 5.5419 | 5.5314 | 5.7193 | 5.7291 | 5.7319 |   |
| PE 20:0_20:3   | 5.4383 | 5.4184 | 5.4772 | 5.4891 | 5.5894 | 5.6227 | 5.6578 |   |
| PE 20:0_20:4   | 5.7795 | 5.8967 | 5.8531 | 5.8722 | 5.3910 | 5.3790 | 5.4698 |   |
| PE 20:0_20:4_1 | 4.4741 | 4.6438 | 4.7219 | 4.7922 | 4.2847 | 4.2744 | 4.3929 |   |
| PE 20:1_20:4   | 5.6061 | 5.5640 | 5.5415 | 5.6914 | 5.3071 | 5.2630 | 5.3213 |   |
| PE 20:1_20:4_1 | 5.5795 | 5.5529 | 5.5134 | 5.4638 | 5.2642 | 5.1307 | 5.2550 |   |
| PE 20:1_22:6   | 5.1538 | 5.1309 | 5.0231 | 5.0084 | 3.6945 | 2.7864 | 3.4853 |   |
| PE 40:6        | 5.2378 | 5.2572 | 5.2518 | 5.3155 | 4.9209 | 4.9295 | 4.9367 | x |
| PE 40:8        | 5.2261 | 4.9244 | 4.8602 | 4.8060 | 4.4937 | 4.4441 | 4.4303 |   |
| PG 16:0_18:2   | 5.3319 | 5.2744 | 5.3140 | 5.6110 | 4.9278 | 4.8076 | 4.9055 |   |
| PG 18:1_20:4   | 4.7770 | 4.7618 | 4.7809 | 4.8530 | 4.4969 | 4.5713 | 4.6207 |   |
| PI 16:0_22:6   | 5.4887 | 5.4820 | 5.4571 | 5.7362 | 4.6718 | 4.3133 | 4.6460 |   |
| PI 17:0_20:4   | 5.7077 | 5.6104 | 5.7337 | 5.6729 | 5.0059 | 4.7569 | 4.6753 | x |
| PI 18:0_20:4   | 7.6924 | 7.6802 | 7.7162 | 7.7500 | 7.6041 | 7.3058 | 7.2130 |   |
| PI 18:0_22:5   | 5.4081 | 5.2631 | 5.3979 | 5.1581 | 4.6757 | 4.4132 | 4.4263 |   |
| PI 18:0_22:6   | 5.8774 | 5.8560 | 5.8636 | 6.0357 | 4.5325 | 4.1920 | 4.2008 |   |
| PI 18:1_18:2   | 6.7530 | 6.6864 | 6.7562 | 6.8865 | 6.5533 | 6.2461 | 6.2569 | x |
| PI 18:1_18:3   | 4.9642 | 4.8258 | 4.9183 | 5.0030 | 4.6022 | 4.4588 | 4.3684 |   |
| PI 18:1_20:4   | 6.4485 | 6.4957 | 6.4818 | 6.3983 | 6.2605 | 6.0148 | 5.9547 |   |
| PI 18:1_20:4_1 | 6.5168 | 6.3845 | 6.5715 | 6.4836 | 6.3748 | 6.1000 | 6.0436 |   |
| PI 18:2_20:4   | 5.1691 | 4.9248 | 5.1755 | 5.0775 | 4.8072 | 4.6110 | 4.6007 |   |
| PI 19:0_20:4   | 5.3395 | 5.4123 | 5.3566 | 5.4469 | 5.2295 | 5.1949 | 5.1279 |   |
| PI 19:0_20:4_1 | 5.4872 | 5.4389 | 5.5156 | 5.4305 | 4.9720 | 4.7298 | 4.6584 |   |
| PI 19:1_20:4   | 4.9494 | 4.5882 | 4.9586 | 4.7033 | 4.4900 | 4.3350 | 4.1607 |   |
| PI 20:3_20:4   | 4.8086 | 4.7006 | 4.7833 | 4.7385 | 3.7194 | 3.7194 | 3.7194 |   |
| PI 38:5        | 5.1975 | 5.1757 | 5.3035 | 4.4768 | 4.4768 | 4.4768 | 4.4768 |   |

|                   |        |        |        |        |        |        |        |   |
|-------------------|--------|--------|--------|--------|--------|--------|--------|---|
| PI 40:4           | 5.4877 | 5.4296 | 5.5157 | 5.6050 | 5.1793 | 4.8360 | 4.7953 |   |
| PI 40:6           | 5.1639 | 5.1456 | 5.2162 | 5.0517 | 4.5641 | 4.5143 | 4.3158 |   |
| SM d33:1          | 5.1378 | 5.1412 | 5.0726 | 5.0864 | 5.0103 | 4.9491 | 4.9635 |   |
| SM d34:1          | 6.1716 | 6.2015 | 6.1506 | 6.2240 | 6.0271 | 6.0213 | 6.0081 |   |
| SM d34:2          | 5.3331 | 5.3935 | 5.3238 | 5.4374 | 5.2976 | 5.2875 | 5.2756 |   |
| SM d38:1          | 4.8720 | 4.9493 | 4.8706 | 4.9151 | 4.8053 | 4.7211 | 4.7309 |   |
| SM d40:1          | 5.8074 | 5.9050 | 5.7990 | 5.9125 | 5.6409 | 5.5901 | 5.5589 |   |
| SM d40:2          | 5.5908 | 5.6299 | 5.5906 | 5.5964 | 5.4561 | 5.4016 | 5.3637 |   |
| SM d41:1          | 5.3872 | 5.3919 | 5.3848 | 5.3248 | 5.2235 | 5.1885 | 5.0862 |   |
| SM d42:1          | 5.6308 | 5.7262 | 5.7115 | 5.7385 | 5.6008 | 5.5408 | 5.5227 |   |
| SM d42:2          | 6.2167 | 6.2076 | 6.2351 | 6.2082 | 6.1298 | 6.1352 | 6.0784 |   |
| SM d42:3_1        | 5.5035 | 5.5696 | 5.5710 | 5.5766 | 4.9195 | 4.8175 | 4.9350 |   |
| TG 15:0_16:0_18:2 | 5.4829 | 5.2461 | 5.4889 | 5.2757 | 4.9997 | 4.9432 | 5.0460 |   |
| TG 15:0_18:2_18:2 | 5.4594 | 5.2358 | 5.3987 | 5.3775 | 4.6555 | 4.7044 | 4.0722 |   |
| TG 16:0_16:1_18:2 | 6.7846 | 6.6246 | 6.6975 | 6.7542 | 6.3987 | 6.4289 | 6.4109 |   |
| TG 16:0_17:0_18:1 | 5.2801 | 5.1380 | 5.1921 | 5.1748 | 4.8901 | 4.8528 | 4.5970 |   |
| TG 16:0_17:1_18:1 | 5.8129 | 5.6290 | 5.8266 | 5.6438 | 5.3052 | 5.3234 | 5.3774 |   |
| TG 16:0_18:1_18:2 | 7.3617 | 7.2473 | 7.3317 | 7.4075 | 7.0052 | 7.0112 | 7.0520 |   |
| TG 16:0_18:1_19:0 | 5.1423 | 4.9864 | 5.0082 | 4.8500 | 4.1397 | 4.6252 | 4.5702 |   |
| TG 16:0_18:1_20:3 | 5.4018 | 5.4136 | 5.4656 | 5.4895 | 5.2562 | 5.2126 | 5.2747 |   |
| TG 16:0_18:1_20:4 | 6.4326 | 6.3604 | 6.4969 | 6.3952 | 5.5972 | 5.5759 | 5.6042 |   |
| TG 16:0_18:1_21:1 | 5.2218 | 5.1488 | 5.2669 | 4.9650 | 4.8100 | 4.7870 | 4.9063 |   |
| TG 16:0_18:1_22:5 | 5.8312 | 5.7578 | 5.8578 | 5.5975 | 4.2265 | 3.9534 | 4.9373 |   |
| TG 16:0_18:1_22:6 | 6.2914 | 6.1698 | 6.2565 | 6.3596 | 3.3710 | 4.3866 | 4.1605 |   |
| TG 16:0_18:2_18:2 | 7.1900 | 7.1200 | 7.1776 | 7.3041 | 6.6226 | 6.6350 | 6.6702 | x |
| TG 16:0_18:2_18:3 | 6.4734 | 6.4063 | 6.4318 | 6.6438 | 5.1787 | 5.8360 | 5.8984 |   |
| TG 16:0_18:2_20:4 | 6.4366 | 6.3972 | 6.4502 | 6.4186 | 5.4154 | 5.4305 | 5.4566 |   |
| TG 16:0_18:2_22:6 | 6.0213 | 6.0069 | 5.9879 | 6.3113 | 4.4412 | 2.5209 | 3.2190 |   |

|                   |        |        |        |        |        |        |        |   |
|-------------------|--------|--------|--------|--------|--------|--------|--------|---|
| TG 16:1_16:1_18:2 | 5.9893 | 5.8825 | 5.8818 | 5.9827 | 5.6853 | 5.6180 | 5.6329 | x |
| TG 17:0_18:1_18:2 | 5.8377 | 5.6818 | 5.7461 | 5.5994 | 5.2473 | 5.1105 | 5.1927 |   |
| TG 17:1_18:1_18:2 | 5.6338 | 5.5115 | 5.6399 | 5.5582 | 4.8785 | 4.9032 | 4.9835 |   |
| TG 17:1_18:1_20:4 | 4.9077 | 4.6792 | 5.0003 | 4.9230 | 3.2395 | 3.9622 | 3.9384 |   |
| TG 17:1_18:2_18:2 | 5.1445 | 4.9507 | 5.2137 | 5.2666 | 4.4040 | 4.2527 | 4.2227 |   |
| TG 18:0_18:0_18:0 | 6.2328 | 6.1966 | 6.1560 | 6.1460 | 6.1202 | 6.0726 | 6.0063 |   |
| TG 18:0_18:1_20:4 | 5.7084 | 5.6491 | 5.6787 | 5.6545 | 5.1255 | 5.0734 | 5.0777 |   |
| TG 18:1_18:1_18:2 | 6.9999 | 6.8551 | 7.0287 | 7.0939 | 6.5454 | 6.5773 | 6.6038 |   |
| TG 18:1_18:1_20:1 | 6.1290 | 5.9601 | 6.1279 | 6.0840 | 5.7352 | 5.7844 | 5.8766 |   |
| TG 18:1_18:2_18:2 | 6.9534 | 6.8280 | 7.0500 | 7.1484 | 6.1781 | 6.1831 | 6.2553 |   |
| TG 18:1_18:2_19:0 | 5.4405 | 5.0622 | 5.4347 | 5.1719 | 4.7795 | 4.7887 | 4.9425 |   |
| TG 18:1_18:2_20:1 | 6.3623 | 6.1806 | 6.3280 | 6.3131 | 5.8723 | 5.8611 | 5.9691 |   |
| TG 18:1_18:2_20:2 | 6.4062 | 6.2102 | 6.3853 | 6.3660 | 5.7518 | 5.7940 | 5.8324 |   |
| TG 18:1_18:2_20:4 | 6.2946 | 6.2726 | 6.3158 | 6.3141 | 5.2470 | 5.1188 | 5.1630 |   |
| TG 18:1_18:2_22:0 | 5.6219 | 5.3184 | 5.5788 | 5.5567 | 5.2028 | 5.1867 | 5.2523 |   |
| TG 18:1_18:2_22:1 | 5.7131 | 5.4971 | 5.6198 | 5.5684 | 5.1507 | 5.0035 | 5.2097 |   |
| TG 18:1_18:2_22:5 | 6.0871 | 6.0068 | 6.1128 | 5.5358 | 4.0375 | 4.4914 | 4.8090 |   |
| TG 18:1_20:4_22:5 | 5.1723 | 5.2933 | 5.3472 | 5.1815 | 3.1951 | 3.8941 | 3.1951 |   |
| TG 18:1_20:4_22:6 | 5.3993 | 5.4919 | 5.2693 | 5.4150 | 4.5703 | 4.5703 | 4.5703 |   |
| TG 18:2_18:2_18:2 | 6.5337 | 6.4067 | 6.7001 | 6.8830 | 5.4633 | 5.1089 | 5.6414 | x |
| TG 18:2_18:2_18:3 | 5.7860 | 5.6178 | 5.9829 | 6.3656 | 4.5417 | 3.7342 | 4.3319 |   |
| TG 18:2_18:2_19:0 | 5.3440 | 5.4357 | 5.4150 | 5.3142 | 4.9078 | 4.6173 | 4.7874 |   |
| TG 18:2_18:2_19:1 | 4.5233 | 4.8627 | 4.5067 | 4.4151 | 3.5136 | 2.8149 | 3.7914 |   |
| TG 18:2_18:2_20:4 | 5.8609 | 5.9494 | 5.9628 | 6.0499 | 4.8724 | 4.9825 | 4.4480 |   |
| TG 18:2_18:2_22:6 | 5.8196 | 5.9617 | 5.8145 | 5.9618 | 4.1579 | 4.1407 | 4.1722 |   |
| TG 18:2_20:5_22:6 | 4.6069 | 4.7229 | 4.6314 | 4.9904 | 3.4666 | 3.4666 | 3.4666 | x |
| TG 49:2           | 5.4927 | 5.2461 | 5.4888 | 5.2757 | 4.9967 | 4.9109 | 5.0460 | x |
| TG 51:3           | 5.8375 | 5.6529 | 5.8236 | 5.7262 | 5.1787 | 5.2186 | 5.3030 |   |

|           |        |        |        |        |        |        |        |  |
|-----------|--------|--------|--------|--------|--------|--------|--------|--|
| TG 51:3_1 | 5.8456 | 5.6654 | 5.8223 | 5.7317 | 5.1787 | 5.2261 | 5.3030 |  |
| TG 51:5   | 4.7280 | 4.9494 | 5.0578 | 4.5730 | 2.8029 | 2.8029 | 2.8029 |  |
| TG 53:8   | 4.2775 | 4.3629 | 4.3318 | 3.3089 | 3.3089 | 3.3089 | 3.3089 |  |
| TG 54:7   | 5.7860 | 5.6183 | 5.9829 | 6.3656 | 4.7567 | 4.7913 | 4.3319 |  |
| TG 54:7_1 | 5.6206 | 5.9733 | 5.5900 | 6.1849 | 5.1734 | 5.2242 | 3.8781 |  |
| TG 55:7   | 4.8369 | 3.7130 | 4.2560 | 4.7047 | 3.0141 | 3.0141 | 3.0141 |  |
| TG 56:6   | 6.2522 | 6.3748 | 6.4369 | 6.3718 | 5.4655 | 5.4180 | 5.5322 |  |
| TG 56:6_1 | 5.9613 | 5.9508 | 6.0982 | 6.2153 | 5.2458 | 5.1315 | 4.9210 |  |
| TG 56:9   | 5.6875 | 5.7406 | 5.7226 | 6.0049 | 4.0795 | 3.0288 | 3.7277 |  |
| TG 57:2   | 4.8101 | 4.7608 | 4.9668 | 4.7923 | 4.6773 | 4.2617 | 4.6005 |  |
| TG 58:11  | 5.2175 | 5.4226 | 5.3058 | 5.5120 | 4.3497 | 4.3497 | 4.3497 |  |
| TG 58:12  | 3.9769 | 4.3356 | 4.0800 | 4.9260 | 3.1530 | 3.1530 | 3.1530 |  |
| TG 58:7   | 6.1360 | 5.9393 | 5.7931 | 5.8577 | 3.4548 | 4.9509 | 5.1986 |  |
| TG 58:8   | 6.1210 | 6.0060 | 6.1131 | 5.7478 | 4.0202 | 4.4707 | 4.4471 |  |
| TG 60:12  | 5.3734 | 5.4903 | 5.2262 | 5.4122 | 4.3741 | 4.3741 | 4.3741 |  |
| TG 62:12  | 4.5371 | 4.4410 | 4.5943 | 4.6226 | 3.7421 | 3.7421 | 3.7421 |  |
| TG 62:13  | 4.7791 | 5.0212 | 4.6902 | 4.9388 | 3.9912 | 3.9912 | 3.9912 |  |
| TG 64:12  | 4.5277 | 4.2340 | 4.0890 | 3.7864 | 3.0875 | 3.0875 | 3.0875 |  |

Red denotes upregulation, blue denotes downregulation.

**Supplementary Table 10: Significantly-Altered Plasma Lipids in Male *Tmem135/Leptin* Mutant (FUN025/*ob*) Mice Compared to Leptin mutant (*ob*) Mice.**

| Lipid Species           | Normalized Log10 Lipid Concentrations |             |             |             |             |             |             |             |                     |                     |                     |                     | Contains DHA |
|-------------------------|---------------------------------------|-------------|-------------|-------------|-------------|-------------|-------------|-------------|---------------------|---------------------|---------------------|---------------------|--------------|
|                         | <i>ob</i> 1                           | <i>ob</i> 2 | <i>ob</i> 3 | <i>ob</i> 4 | <i>ob</i> 5 | <i>ob</i> 6 | <i>ob</i> 7 | <i>ob</i> 8 | FUN025/ <i>ob</i> 1 | FUN025/ <i>ob</i> 2 | FUN025/ <i>ob</i> 3 | FUN025/ <i>ob</i> 4 |              |
| ACar 14:1               | 4.0722                                | 3.7630      | 4.0815      | 3.8566      | 3.5481      | 4.0298      | 4.1784      | 3.7164      | 4.3060              | 4.4116              | 4.2333              | 4.1024              |              |
| ACar 20:1               | 3.5195                                | 3.5193      | 2.9542      | 3.9514      | 3.7764      | 3.6991      | 3.9278      | 3.3642      | 2.1164              | 2.8144              | 3.1727              | 2.1164              |              |
| CE 16:0                 | 4.9433                                | 4.8848      | 4.9425      | 4.9010      | 4.8546      | 4.8682      | 4.9354      | 5.0091      | 4.7511              | 4.8175              | 4.7175              | 4.7093              |              |
| CE 18:3                 | 5.3270                                | 5.3101      | 5.2450      | 5.3513      | 5.3739      | 5.1159      | 5.2527      | 5.3112      | 5.4858              | 5.5838              | 5.3733              | 5.5282              |              |
| CE 20:4                 | 7.3056                                | 7.3089      | 7.3344      | 7.3782      | 7.0123      | 7.2883      | 7.4030      | 7.4572      | 6.4954              | 6.6801              | 6.4703              | 6.5329              |              |
| CE 20:5                 | 5.9474                                | 5.9254      | 5.5293      | 5.9572      | 5.4902      | 5.5697      | 5.6027      | 5.6232      | 5.1355              | 5.2635              | 5.0754              | 5.1967              |              |
| CE 22:5                 | 5.3807                                | 5.1066      | 5.7784      | 5.3233      | 4.7535      | 5.6097      | 5.6692      | 5.6371      | 4.3432              | 4.4993              | 4.3539              | 3.9736              |              |
| CE 22:6                 | 6.7208                                | 6.7662      | 6.6151      | 6.7641      | 6.4870      | 6.6690      | 6.7121      | 6.8038      | 5.0257              | 5.2175              | 5.0257              | 5.0918              | x            |
| Cer_ADS d26:0_15:0      | 5.6376                                | 5.6527      | 5.6177      | 5.7690      | 5.5958      | 5.5557      | 5.7442      | 5.6038      | 5.5855              | 5.5376              | 5.4059              | 5.5219              |              |
| Cer_ADS d40:0           | 5.7449                                | 5.7121      | 5.7490      | 5.9309      | 5.7179      | 5.6758      | 5.8239      | 5.8009      | 5.6812              | 5.6384              | 5.5267              | 5.5680              |              |
| Cer_AS d26:2_16:0       | 4.7352                                | 4.7395      | 4.7731      | 4.8452      | 4.6222      | 4.6911      | 4.8270      | 4.7557      | 4.5174              | 4.5924              | 4.2279              | 4.4518              |              |
| Cer_NDS d18:0_16:0      | 5.2363                                | 5.3023      | 5.3862      | 5.3531      | 5.2869      | 5.3432      | 5.3676      | 5.3829      | 5.2724              | 5.3085              | 5.2209              | 5.1678              |              |
| Cer_NP t18:0_20:0       | 4.9489                                | 4.9553      | 4.9874      | 5.0811      | 4.9567      | 4.9396      | 5.1035      | 5.0720      | 4.8852              | 4.8975              | 4.7107              | 4.7166              |              |
| Cer_NP t18:0_21:0       | 4.8397                                | 4.7923      | 4.7831      | 4.9516      | 4.9367      | 4.8399      | 4.9759      | 4.7901      | 4.6088              | 4.7248              | 4.4376              | 4.5750              |              |
| Cer_NP t18:0_22:0       | 5.7449                                | 5.7121      | 5.7339      | 5.9309      | 5.7179      | 5.6758      | 5.8239      | 5.8009      | 5.6812              | 5.6384              | 5.5267              | 5.5680              |              |
| Cer_NP t18:0_23:0       | 5.6384                                | 5.6527      | 5.6128      | 5.7690      | 5.5961      | 5.5558      | 5.7453      | 5.6038      | 5.5865              | 5.5376              | 5.3842              | 5.5227              |              |
| Cer_NP t41:1            | 4.7850                                | 4.8428      | 4.8719      | 4.9123      | 4.8719      | 4.8173      | 4.9868      | 4.8684      | 4.6647              | 4.8140              | 4.4998              | 4.6031              |              |
| Cer_NS d18:1_22:1       | 5.8923                                | 5.9693      | 5.8473      | 5.8210      | 5.8452      | 5.8671      | 6.0449      | 6.3689      | 5.3970              | 5.6715              | 5.3858              | 5.4639              |              |
| Cer_NS d18:2_24:1       | 5.8179                                | 5.8852      | 5.7581      | 5.8558      | 5.7957      | 5.7504      | 5.8820      | 5.9882      | 5.6078              | 5.8253              | 5.5624              | 5.6541              |              |
| DG 16:0_18:1            | 4.6195                                | 4.6031      | 4.6086      | 4.5107      | 4.4418      | 4.5770      | 4.7228      | 4.5432      | 4.8859              | 4.9332              | 4.7788              | 4.7843              |              |
| DG 18:1_20:4            | 4.2312                                | 4.4749      | 4.1609      | 3.8339      | 4.3880      | 4.3685      | 4.4897      | 4.6016      | 2.9750              | 3.6890              | 3.5452              | 2.2765              |              |
| EtherOxPC 18:1e_20:3+10 | 6.3095                                | 6.1288      | 6.2541      | 6.2696      | 6.3569      | 6.3177      | 6.3300      | 6.1834      | 6.0803              | 6.1085              | 6.0682              | 6.1035              |              |
| EtherPC 14:0e_8:0       | 5.1148                                | 5.1704      | 5.1580      | 5.1534      | 5.3630      | 5.0882      | 5.1500      | 5.1396      | 5.0238              | 5.0109              | 4.9444              | 5.0412              |              |
| EtherPC 16:0e_18:2      | 5.0444                                | 5.0661      | 4.9531      | 5.0766      | 5.7016      | 5.3122      | 5.2843      | 5.1914      | 5.7676              | 5.6209              | 5.6234              | 5.5089              |              |



|                      |        |        |        |        |        |        |        |        |        |        |        |        |   |
|----------------------|--------|--------|--------|--------|--------|--------|--------|--------|--------|--------|--------|--------|---|
| EtherPC 16:1e_18:2   | 5.6674 | 5.3758 | 5.7899 | 5.6226 | 5.8346 | 5.6742 | 5.7541 | 5.6313 | 6.0132 | 5.9560 | 5.9431 | 5.9885 |   |
| EtherPC 16:1e_20:4   | 5.6179 | 5.5047 | 5.8285 | 5.6257 | 5.6405 | 5.7211 | 5.7612 | 5.8395 | 5.1563 | 5.0026 | 4.8571 | 5.1030 |   |
| EtherPC 16:1e_22:6   | 5.3598 | 5.4228 | 5.3667 | 5.3998 | 5.4581 | 5.3776 | 5.3752 | 5.4086 | 5.0645 | 5.0966 | 4.9218 | 5.0210 | x |
| EtherPC 18:0e_20:4   | 5.7971 | 5.8573 | 5.9636 | 5.8650 | 5.9148 | 5.9103 | 5.9499 | 5.9931 | 5.4752 | 5.4578 | 5.4195 | 5.4329 |   |
| EtherPC 18:0e_22:4   | 5.5672 | 5.6311 | 5.7293 | 5.6616 | 5.5672 | 5.7084 | 5.7261 | 5.7908 | 5.1895 | 5.0998 | 5.0279 | 5.1319 |   |
| EtherPC 18:1e_18:2   | 4.1791 | 4.5704 | 4.6992 | 4.7032 | 5.0203 | 4.5070 | 4.5162 | 4.6613 | 5.0127 | 4.9159 | 4.9177 | 5.0142 |   |
| EtherPC 18:1e_20:4   | 6.1476 | 6.1158 | 6.1676 | 6.1161 | 6.1756 | 6.1777 | 6.1643 | 6.1894 | 5.9866 | 5.9042 | 5.8698 | 5.9542 |   |
| EtherPC 18:1e_22:5   | 5.1414 | 5.1343 | 4.9120 | 4.9213 | 5.2273 | 5.1441 | 4.9914 | 4.7583 | 3.4155 | 4.5189 | 4.4710 | 4.7908 |   |
| EtherPC 24:0e        | 5.3970 | 5.3722 | 5.4236 | 5.4552 | 5.6563 | 5.3968 | 5.4254 | 5.4422 | 5.3392 | 5.2733 | 5.2496 | 5.3679 |   |
| EtherPC 32:1e        | 4.9404 | 4.4455 | 4.6112 | 4.5800 | 4.5964 | 4.8577 | 3.4906 | 4.7006 | 5.2120 | 4.9143 | 5.3899 | 5.3933 |   |
| EtherPE 16:0e_18:1   | 4.9768 | 4.9666 | 5.1753 | 4.8877 | 4.8732 | 5.0465 | 5.1191 | 5.2005 | 5.3740 | 5.3219 | 5.1878 | 5.3125 |   |
| EtherPE 16:1e_18:2   | 5.7431 | 5.7253 | 5.9626 | 5.6871 | 5.9325 | 5.6952 | 5.8756 | 5.8331 | 6.0386 | 5.9826 | 5.8800 | 5.9959 |   |
| EtherPE 16:1e_20:4   | 6.1893 | 6.1651 | 6.3806 | 6.1950 | 6.1603 | 6.1996 | 6.3990 | 6.4375 | 5.5925 | 5.7785 | 5.6376 | 5.7715 |   |
| EtherPE 16:1e_22:5   | 5.3733 | 5.4507 | 5.8103 | 5.5432 | 5.5512 | 5.5891 | 5.7470 | 5.6720 | 5.0683 | 5.0850 | 5.0568 | 5.1037 |   |
| EtherPE 16:1e_22:6   | 6.3276 | 6.3665 | 6.4812 | 6.3903 | 6.5140 | 6.4138 | 6.4787 | 6.5411 | 5.5443 | 5.5976 | 5.4428 | 5.5077 | x |
| EtherPE 18:0e_20:4   | 6.1966 | 6.1916 | 6.3619 | 6.2363 | 6.0152 | 6.2459 | 6.3969 | 6.3726 | 5.7378 | 5.7787 | 5.6344 | 5.7324 |   |
| EtherPE 18:0e_20:4_1 | 4.8851 | 4.9938 | 5.0881 | 4.9851 | 5.1692 | 5.0236 | 4.9845 | 5.0763 | 4.5895 | 4.6574 | 4.5578 | 4.7681 |   |
| EtherPE 18:0e_20:5   | 5.1012 | 4.9196 | 5.1349 | 5.3507 | 5.0815 | 5.0278 | 5.2105 | 5.0103 | 4.8295 | 4.7762 | 4.4682 | 5.0244 |   |
| EtherPE 18:0e_22:4   | 5.6982 | 5.7093 | 6.0291 | 5.8189 | 5.8321 | 5.7955 | 5.9183 | 5.9244 | 5.3379 | 5.3427 | 5.2590 | 5.3664 |   |
| EtherPE 18:0e_22:5   | 5.1566 | 5.2600 | 5.5521 | 5.3225 | 5.3650 | 5.3306 | 5.5077 | 5.5313 | 5.2068 | 4.7955 | 4.7688 | 5.0637 |   |
| EtherPE 18:1e_20:4   | 6.1415 | 6.1516 | 6.2740 | 6.2407 | 6.1985 | 6.1879 | 6.3033 | 6.3105 | 5.6424 | 5.7933 | 5.5548 | 5.6469 |   |
| EtherPE 18:1e_22:5   | 5.0517 | 4.9642 | 5.4250 | 5.0644 | 5.0265 | 5.2130 | 5.3298 | 5.3307 | 4.6732 | 4.7034 | 4.5841 | 4.4635 |   |
| EtherPE 18:1e_22:6   | 6.4042 | 6.4997 | 6.5351 | 6.4885 | 5.8745 | 6.4659 | 6.5797 | 6.6362 | 5.1352 | 5.2972 | 5.0104 | 5.0871 | x |
| EtherPE 18:2e_18:2   | 5.7208 | 5.7613 | 5.8926 | 5.7591 | 5.9394 | 5.7119 | 5.9060 | 5.7832 | 5.7590 | 5.6107 | 5.5062 | 5.6305 |   |
| EtherPE 18:2e_18:2_1 | 4.2922 | 3.1255 | 3.8245 | 3.1255 | 3.1255 | 3.1255 | 3.8637 | 4.2393 | 5.3619 | 5.3906 | 4.5039 | 5.3233 |   |
| EtherPE 18:2e_20:4   | 5.8099 | 5.7676 | 5.9263 | 5.8544 | 5.6567 | 5.7028 | 5.9908 | 5.9339 | 5.4511 | 5.5629 | 5.2521 | 5.4320 |   |
| EtherPE 18:2e_22:6   | 5.8926 | 5.9080 | 5.9191 | 5.9663 | 5.8288 | 5.9386 | 5.9744 | 5.9667 | 4.5800 | 4.8495 | 4.7336 | 4.5581 | x |
| EtherPE 38:6e        | 5.7448 | 5.7787 | 5.9181 | 5.7175 | 6.0719 | 5.8307 | 5.8775 | 5.9248 | 5.2687 | 5.1128 | 5.0507 | 5.1106 |   |

|                      |        |        |        |        |        |        |        |        |        |        |        |        |   |
|----------------------|--------|--------|--------|--------|--------|--------|--------|--------|--------|--------|--------|--------|---|
| EtherPE 40:6e        | 6.2390 | 6.3089 | 6.3498 | 6.2989 | 6.4635 | 6.3222 | 6.3735 | 6.3684 | 5.0073 | 5.1161 | 4.5641 | 4.9531 |   |
| FA 16:0_1            | 5.2543 | 5.2388 | 5.3181 | 5.2559 | 5.3085 | 5.2526 | 5.3453 | 5.3410 | 5.2609 | 5.1206 | 5.1392 | 5.2745 |   |
| FA 16:1              | 5.5204 | 5.4090 | 5.8504 | 5.5131 | 5.5729 | 5.5507 | 5.5617 | 5.5243 | 5.6331 | 5.8909 | 5.8242 | 5.7682 |   |
| FA 20:3_1            | 4.8268 | 4.6840 | 4.9249 | 4.8116 | 4.9902 | 4.7655 | 4.6994 | 4.8012 | 4.6274 | 4.5357 | 4.5425 | 4.6701 |   |
| FA 22:4              | 4.7618 | 4.6428 | 5.0072 | 4.7874 | 5.0111 | 4.9165 | 4.8294 | 4.8567 | 4.2354 | 4.1965 | 4.1413 | 4.1912 |   |
| HexCer_AP t18:0_16:0 | 6.0356 | 6.0775 | 6.2079 | 6.1488 | 6.0046 | 6.0596 | 6.2343 | 6.2734 | 5.9491 | 6.0539 | 5.8215 | 5.9380 |   |
| HexCer_NDS d40:2     | 5.7642 | 5.7874 | 5.7285 | 5.6510 | 5.7885 | 5.7814 | 5.8342 | 5.9677 | 5.6600 | 5.6826 | 5.6007 | 5.6452 |   |
| HexCer_NDS d40:2_1   | 5.8327 | 5.7859 | 5.7285 | 5.6510 | 5.7885 | 5.8138 | 5.8342 | 5.9686 | 5.6600 | 5.6929 | 5.6007 | 5.6452 |   |
| HexCer_NDS d42:2     | 6.3806 | 6.3304 | 6.4021 | 6.3398 | 6.2065 | 6.3865 | 6.3896 | 6.3969 | 6.4861 | 6.5757 | 6.4534 | 6.4981 |   |
| HexCer_NDS d42:2_1   | 6.3806 | 6.3292 | 6.4021 | 6.3446 | 6.2010 | 6.3865 | 6.3897 | 6.3969 | 6.4861 | 6.5757 | 6.4545 | 6.4989 |   |
| HexCer_NDS d43:1     | 4.7630 | 4.7706 | 4.8877 | 4.9462 | 4.5942 | 4.8920 | 4.8704 | 4.7148 | 4.6588 | 4.8219 | 4.7557 | 4.9165 |   |
| LPA 16:0             | 4.6015 | 4.6038 | 4.6905 | 4.6336 | 4.6156 | 4.5785 | 4.7135 | 4.7197 | 4.6104 | 4.5261 | 4.5110 | 4.5611 |   |
| LPA 18:0             | 4.5079 | 4.5038 | 4.5044 | 4.5845 | 4.5230 | 4.4714 | 4.5632 | 4.5754 | 4.4132 | 4.4833 | 4.4309 | 4.4419 |   |
| LPC 0:0/18:0         | 5.3253 | 5.2343 | 5.3667 | 5.4234 | 5.3403 | 5.2164 | 5.3550 | 5.3584 | 5.2315 | 5.1749 | 5.2111 | 5.2521 |   |
| LPC 0:0/20:4         | 5.3538 | 5.6079 | 5.2446 | 5.3427 | 5.1927 | 5.5921 | 5.7593 | 5.7647 | 4.4981 | 4.8738 | 4.4874 | 4.4544 |   |
| LPC 0:0/22:5         | 4.2616 | 3.9560 | 4.3382 | 4.2151 | 4.7047 | 3.8368 | 3.9511 | 4.1136 | 3.4873 | 3.2752 | 3.6392 | 3.7663 |   |
| LPC 0:0/22:5_1       | 4.0339 | 4.1694 | 3.7574 | 3.8223 | 3.7593 | 3.9375 | 4.1291 | 4.2341 | 2.3548 | 3.0535 | 2.3548 | 2.3548 |   |
| LPC 0:0/22:6         | 5.0246 | 5.2713 | 4.8849 | 5.0257 | 5.0516 | 5.2020 | 5.2546 | 5.3492 | 3.3025 | 3.8776 | 3.5191 | 3.5458 | x |
| LPC 0:0/24:1         | 4.0552 | 3.6066 | 4.0906 | 4.2265 | 4.2225 | 4.0244 | 3.8483 | 4.0147 | 3.8090 | 3.5652 | 3.5213 | 3.5915 |   |
| LPC 15:0/0:0         | 4.6443 | 4.6272 | 4.8584 | 4.6813 | 4.8918 | 4.8214 | 4.7546 | 4.7971 | 4.5981 | 4.5718 | 4.5511 | 4.5919 |   |
| LPC 16:0/0:0         | 7.1802 | 7.1845 | 7.2642 | 7.2180 | 7.2431 | 7.1879 | 7.2659 | 7.3011 | 7.1796 | 7.0991 | 7.1204 | 7.1862 |   |
| LPC 16:1/0:0         | 5.9028 | 5.8016 | 6.0217 | 5.8669 | 5.7455 | 5.9261 | 5.9015 | 5.9090 | 6.0877 | 5.9769 | 6.0283 | 6.0490 |   |
| LPC 17:0/0:0         | 5.2449 | 5.2790 | 5.3345 | 5.3104 | 5.5707 | 5.3248 | 5.3515 | 5.4050 | 4.9658 | 4.8912 | 4.9072 | 4.9949 |   |
| LPC 17:0/0:0_1       | 4.8300 | 4.8849 | 5.0333 | 4.9430 | 5.1314 | 5.0124 | 4.9409 | 4.9802 | 4.0789 | 4.4367 | 4.4275 | 4.6029 |   |
| LPC 18:0/0:0         | 7.1541 | 7.1640 | 7.1714 | 7.2097 | 7.1565 | 7.1140 | 7.2005 | 7.2301 | 7.0526 | 7.0866 | 7.0191 | 7.0732 |   |
| LPC 18:0/0:0_1       | 6.0653 | 5.9978 | 6.1090 | 6.1484 | 6.1204 | 5.9782 | 6.0808 | 6.1061 | 5.9743 | 5.9200 | 5.9728 | 6.0198 |   |
| LPC 18:1/0:0         | 7.0496 | 6.8909 | 7.1389 | 7.0010 | 6.7883 | 7.0511 | 7.0313 | 7.0260 | 7.1681 | 7.1476 | 7.1176 | 7.1358 |   |
| LPC 18:3/0:0         | 4.2676 | 4.2429 | 4.3265 | 4.3216 | 4.5479 | 4.0714 | 4.2830 | 4.2714 | 4.6442 | 4.5415 | 4.5730 | 4.5661 |   |

|                |        |        |        |        |        |        |        |        |        |        |        |        |   |
|----------------|--------|--------|--------|--------|--------|--------|--------|--------|--------|--------|--------|--------|---|
| LPC 19:0/0:0_1 | 4.7772 | 4.7201 | 4.8183 | 4.7753 | 5.1571 | 4.8488 | 4.7661 | 4.7881 | 4.4650 | 4.3661 | 4.2384 | 4.4989 |   |
| LPC 19:1/0:0   | 4.5481 | 4.2648 | 4.6873 | 4.6229 | 4.7514 | 4.6030 | 4.5749 | 4.3956 | 4.2975 | 3.3540 | 4.1317 | 4.3188 |   |
| LPC 20:2/0:0_1 | 4.7715 | 4.5014 | 4.8121 | 4.5592 | 4.5565 | 4.7145 | 4.6474 | 4.6617 | 5.2311 | 5.2244 | 5.2588 | 5.2289 |   |
| LPC 20:2/0:0_2 | 4.6873 | 4.8471 | 4.3775 | 4.3625 | 4.5049 | 4.9354 | 5.0185 | 4.8171 | 4.1724 | 4.8184 | 3.8186 | 3.8501 |   |
| LPC 20:3/0:0_1 | 4.7244 | 4.4155 | 5.0619 | 4.4453 | 4.1564 | 4.8259 | 4.7483 | 4.6882 | 5.1121 | 5.1784 | 5.0833 | 4.9596 |   |
| LPC 20:3/0:0_2 | 5.4881 | 5.0637 | 5.7345 | 5.2632 | 4.8195 | 5.5051 | 5.4375 | 5.3364 | 5.8025 | 5.8006 | 5.7856 | 5.7126 |   |
| LPC 20:4/0:0   | 6.6027 | 6.5039 | 6.7399 | 6.6976 | 6.6665 | 6.5565 | 6.5733 | 6.6781 | 5.9717 | 5.9015 | 5.9384 | 5.9121 |   |
| LPC 20:4/0:0_1 | 5.9990 | 6.3143 | 5.8919 | 5.9855 | 5.8760 | 6.3013 | 6.4278 | 5.7445 | 5.2026 | 5.5558 | 5.1316 | 5.1484 |   |
| LPC 20:5/0:0   | 5.3614 | 5.0925 | 5.0990 | 5.3955 | 5.3358 | 4.8548 | 5.0218 | 5.0533 | 4.7793 | 3.6103 | 4.7536 | 4.7603 |   |
| LPC 22:1/0:0   | 4.8145 | 4.6344 | 4.8531 | 4.6391 | 5.0215 | 4.7593 | 4.7004 | 4.8871 | 4.6179 | 4.6564 | 4.5385 | 4.5979 |   |
| LPC 22:5/0:0   | 4.3086 | 3.9490 | 4.8835 | 4.1924 | 4.3551 | 4.4495 | 4.4486 | 4.4466 | 3.2988 | 3.4907 | 3.6330 | 3.4624 |   |
| LPC 22:5/0:0_2 | 4.9156 | 4.7585 | 5.4916 | 4.7976 | 5.1220 | 5.1986 | 5.0984 | 4.7161 | 4.2503 | 3.6492 | 4.1420 | 4.2287 |   |
| LPC 22:6/0:0   | 6.3071 | 6.3253 | 6.3195 | 6.3652 | 6.5274 | 6.2955 | 6.2491 | 6.3941 | 3.0688 | 4.7614 | 4.7794 | 4.7959 | x |
| LPC 24:1/0:0   | 4.7499 | 4.6860 | 4.8346 | 4.7693 | 4.9337 | 4.8060 | 4.8203 | 4.8381 | 4.5718 | 4.5479 | 4.4731 | 4.5720 |   |
| LPE 16:1       | 4.1819 | 4.1015 | 4.4544 | 4.1343 | 4.2489 | 4.3126 | 4.3844 | 4.3362 | 4.6014 | 4.5392 | 4.5499 | 4.6274 |   |
| LPE 18:0       | 5.7395 | 5.7713 | 5.8044 | 5.8822 | 5.8293 | 5.6494 | 5.8689 | 5.8532 | 5.6167 | 5.7163 | 5.5560 | 5.6284 |   |
| LPE 18:1       | 5.4483 | 5.3379 | 5.6313 | 5.4303 | 5.3680 | 5.4159 | 5.4817 | 5.4400 | 5.7574 | 5.6484 | 5.7015 | 5.7329 |   |
| LPE 18:2       | 5.5420 | 5.3044 | 5.6782 | 5.6616 | 5.5689 | 5.2328 | 5.2563 | 5.2869 | 5.9543 | 5.6439 | 5.9040 | 5.9433 |   |
| LPE 20:3       | 4.7846 | 4.5769 | 4.9419 | 4.6619 | 4.8195 | 4.7214 | 4.7722 | 4.7582 | 5.0368 | 5.0862 | 5.1917 | 5.2480 |   |
| LPE 20:4_1     | 5.3592 | 5.5901 | 5.4244 | 5.4306 | 5.3926 | 5.6746 | 5.7638 | 5.8586 | 5.0171 | 5.4703 | 5.0799 | 4.9643 |   |
| LPE 22:6       | 5.5184 | 5.7911 | 6.0577 | 5.9613 | 6.1500 | 5.8080 | 5.8204 | 5.9728 | 4.8032 | 4.6486 | 4.6301 | 4.7477 | x |
| LPG 18:1       | 4.2910 | 4.1054 | 4.4175 | 4.3012 | 4.1699 | 4.1219 | 4.0779 | 4.1709 | 4.5658 | 4.4120 | 4.4674 | 4.5003 |   |
| PC 14:0_16:0   | 5.0630 | 5.0653 | 5.1966 | 5.1024 | 5.1619 | 5.1322 | 5.1491 | 5.0780 | 5.2227 | 5.2335 | 5.1824 | 5.2330 |   |
| PC 14:0_18:2   | 5.7832 | 5.7730 | 5.8139 | 5.7782 | 5.9124 | 5.8330 | 5.8529 | 5.8302 | 5.6982 | 5.6916 | 5.6078 | 5.6778 |   |
| PC 14:0_20:4   | 5.2651 | 5.3574 | 5.3583 | 5.3291 | 5.5047 | 5.3816 | 5.4402 | 5.4494 | 4.5112 | 4.6992 | 4.6131 | 4.6089 |   |
| PC 14:0_22:6   | 5.3223 | 5.4282 | 5.1411 | 5.3940 | 5.4238 | 5.2669 | 5.3192 | 5.4106 | 3.7828 | 3.9771 | 3.6953 | 3.6429 | x |
| PC 15:0_18:2   | 5.0073 | 5.0402 | 5.1801 | 5.1887 | 5.5140 | 5.1383 | 5.1277 | 5.2605 | 4.8704 | 4.7950 | 4.7449 | 4.9859 |   |
| PC 15:0_20:4   | 5.9496 | 6.0033 | 6.0151 | 5.9439 | 5.9946 | 5.9758 | 6.0982 | 6.1369 | 5.7762 | 5.9154 | 5.5102 | 5.7156 |   |

|                |        |        |        |        |        |        |        |        |        |        |        |        |   |
|----------------|--------|--------|--------|--------|--------|--------|--------|--------|--------|--------|--------|--------|---|
| PC 15:0_22:6   | 5.3689 | 5.5690 | 5.4335 | 5.5588 | 5.5961 | 5.3765 | 5.4409 | 5.5917 | 4.5790 | 4.5579 | 4.6334 | 4.6106 | x |
| PC 16:0_16:0   | 6.2261 | 6.2551 | 6.2910 | 6.2719 | 6.3869 | 6.2127 | 6.2767 | 6.3279 | 5.9848 | 5.9456 | 5.8871 | 5.9789 |   |
| PC 16:0_16:1   | 6.2790 | 6.2298 | 6.4092 | 6.1848 | 6.0985 | 6.3334 | 6.3735 | 6.3409 | 6.6247 | 6.5788 | 6.5670 | 6.6567 |   |
| PC 16:0_18:0   | 5.9585 | 6.0256 | 5.9793 | 6.0310 | 6.0833 | 5.8772 | 6.0489 | 6.1086 | 5.5134 | 5.5055 | 5.4378 | 5.5157 |   |
| PC 16:0_18:1   | 7.6328 | 7.5941 | 7.7511 | 7.5863 | 7.3853 | 7.6795 | 7.7359 | 7.7086 | 7.8534 | 7.8815 | 7.8195 | 7.8653 |   |
| PC 16:0_18:2_1 | 5.4069 | 5.4040 | 5.6501 | 5.6594 | 5.4295 | 5.3178 | 5.3322 | 5.3635 | 5.7180 | 5.6805 | 5.5391 | 5.7543 |   |
| PC 16:0_18:3   | 5.9257 | 6.0016 | 6.0495 | 5.9751 | 5.9474 | 5.9104 | 6.0711 | 6.0560 | 6.5258 | 6.4578 | 6.3946 | 6.4941 |   |
| PC 16:0_20:4   | 7.5947 | 7.6667 | 7.6707 | 7.6768 | 7.5890 | 7.6187 | 7.7342 | 7.7838 | 7.0408 | 7.1139 | 6.9999 | 7.0214 |   |
| PC 16:0_20:4_1 | 4.7884 | 4.8326 | 4.7632 | 4.7024 | 4.6451 | 4.8048 | 4.8715 | 4.9858 | 3.9037 | 3.5433 | 4.2607 | 4.3290 |   |
| PC 16:0_20:5   | 6.4545 | 6.5592 | 6.2412 | 6.5240 | 6.3567 | 6.2124 | 6.3074 | 6.3166 | 5.8294 | 5.8274 | 5.7604 | 5.8443 |   |
| PC 16:0_22:6   | 7.5143 | 7.6253 | 7.5015 | 7.6030 | 7.5367 | 7.5313 | 7.5791 | 7.6611 | 6.0945 | 6.1664 | 6.0636 | 5.8128 | x |
| PC 16:1_18:2   | 6.6155 | 6.6394 | 6.6300 | 6.6961 | 6.8309 | 6.5928 | 6.6694 | 6.6922 | 6.4556 | 6.4180 | 6.2918 | 6.4617 |   |
| PC 16:1_20:4   | 6.3122 | 6.3728 | 6.3952 | 6.4038 | 6.2996 | 6.4162 | 6.4474 | 6.5066 | 5.5226 | 5.6105 | 5.4348 | 5.4676 |   |
| PC 16:1_22:5   | 5.5626 | 5.4972 | 5.5543 | 5.5609 | 5.3539 | 5.5433 | 5.6076 | 5.5237 | 4.7935 | 4.8089 | 4.7326 | 4.7404 |   |
| PC 16:1_22:6   | 6.2806 | 6.3477 | 6.1171 | 6.3182 | 6.1836 | 6.2812 | 6.2264 | 6.3670 | 4.5454 | 3.6726 | 2.9801 | 4.2000 | x |
| PC 16:2_18:2   | 4.9018 | 4.9333 | 4.9286 | 4.9549 | 4.9603 | 4.9038 | 5.0008 | 5.0299 | 4.4086 | 4.4445 | 4.3822 | 4.2029 |   |
| PC 17:0_20:4   | 5.9999 | 6.0739 | 6.0811 | 6.1218 | 6.2126 | 6.1035 | 6.1337 | 6.1136 | 5.3007 | 5.2592 | 5.1139 | 5.2652 |   |
| PC 17:0_22:6   | 3.7613 | 5.4445 | 5.5676 | 5.4181 | 5.6279 | 4.8000 | 4.5916 | 5.3419 | 3.6633 | 4.4005 | 3.6344 | 3.8043 | x |
| PC 17:1_18:2   | 4.9882 | 4.6968 | 4.9777 | 4.9332 | 5.3256 | 4.9981 | 4.8021 | 4.9745 | 4.0853 | 4.7183 | 4.3527 | 4.5569 |   |
| PC 17:1_22:6   | 4.4848 | 4.5621 | 4.4808 | 4.5970 | 4.5599 | 4.5355 | 4.3901 | 4.2649 | 3.5659 | 3.5659 | 3.5659 | 3.5659 | x |
| PC 18:0_18:0   | 5.4009 | 5.4399 | 5.2773 | 5.3799 | 5.5345 | 5.1619 | 5.3663 | 5.5093 | 4.8607 | 4.8830 | 4.8560 | 5.0061 |   |
| PC 18:0_18:1   | 7.3239 | 7.2596 | 7.3377 | 7.2642 | 6.8728 | 7.3221 | 7.3682 | 7.3282 | 7.5712 | 7.7142 | 7.5341 | 7.5756 |   |
| PC 18:0_18:1_1 | 5.0428 | 4.2921 | 3.9102 | 4.0483 | 4.1565 | 4.9219 | 4.8663 | 3.2113 | 5.3202 | 5.4743 | 5.2383 | 4.8005 |   |
| PC 18:0_20:1   | 5.8545 | 5.7072 | 5.8408 | 5.6979 | 5.6423 | 5.6372 | 5.6994 | 5.9177 | 6.0058 | 6.1476 | 5.9907 | 5.9296 |   |
| PC 18:0_20:2   | 6.5584 | 6.4611 | 6.4238 | 6.4662 | 6.5542 | 6.5780 | 6.5364 | 6.5144 | 6.6151 | 6.7338 | 6.6042 | 6.6114 |   |
| PC 18:0_20:4   | 7.5186 | 7.6116 | 7.5315 | 7.6788 | 7.2900 | 7.5035 | 7.6725 | 7.7301 | 6.6545 | 6.8756 | 5.8435 | 5.8629 |   |
| PC 18:0_20:4_1 | 4.2753 | 4.4918 | 4.6401 | 4.6945 | 4.3197 | 3.7651 | 4.5552 | 4.5826 | 3.8336 | 3.2295 | 3.9947 | 3.4398 |   |
| PC 18:0_20:5   | 6.3414 | 6.3120 | 6.6056 | 6.3518 | 6.0274 | 6.3630 | 6.5202 | 6.5283 | 5.4630 | 5.5552 | 4.3945 | 5.4298 |   |

|                |        |        |        |        |        |        |        |        |        |        |        |        |   |
|----------------|--------|--------|--------|--------|--------|--------|--------|--------|--------|--------|--------|--------|---|
| PC 18:0_22:5   | 6.2404 | 5.9187 | 6.4775 | 6.0397 | 5.4414 | 6.3880 | 6.4930 | 6.4530 | 5.2045 | 5.2537 | 5.1681 | 5.1418 |   |
| PC 18:0_22:5_1 | 6.1090 | 6.0204 | 5.7761 | 5.9763 | 5.9790 | 5.9098 | 5.2970 | 6.1538 | 5.4173 | 5.5447 | 5.3812 | 5.4438 |   |
| PC 18:0_22:6   | 7.3184 | 7.4078 | 7.2390 | 7.3981 | 7.1802 | 7.3088 | 7.3326 | 7.3705 | 5.9405 | 6.0610 | 5.8697 | 5.9030 | x |
| PC 18:1_18:2   | 7.2016 | 7.0970 | 7.2010 | 7.2416 | 7.0677 | 7.1475 | 7.2166 | 7.1051 | 7.0703 | 7.0914 | 6.9739 | 7.0241 |   |
| PC 18:1_20:3   | 6.8879 | 6.8307 | 6.8626 | 6.8497 | 6.5434 | 6.9394 | 6.8879 | 6.8484 | 6.6575 | 6.4421 | 6.6091 | 6.3992 |   |
| PC 18:1_20:4   | 7.0931 | 7.0915 | 7.1164 | 7.1504 | 6.9024 | 7.1925 | 7.1525 | 7.1178 | 6.4795 | 6.5892 | 6.3571 | 6.4641 |   |
| PC 18:1_20:4_1 | 5.0715 | 5.3450 | 5.3976 | 5.2499 | 5.0463 | 5.3690 | 5.3922 | 5.2698 | 5.0034 | 5.1799 | 4.5000 | 4.7684 |   |
| PC 18:1_22:5   | 5.8534 | 5.4693 | 6.1057 | 5.8382 | 5.5817 | 6.0843 | 5.7578 | 5.7929 | 5.1492 | 4.8915 | 3.8966 | 4.5637 |   |
| PC 18:1_22:6   | 6.8693 | 6.8657 | 6.7824 | 6.8764 | 6.5770 | 6.9565 | 6.8447 | 6.8012 | 5.6268 | 5.7190 | 5.5829 | 5.5446 | x |
| PC 18:2_20:4   | 6.7388 | 6.7770 | 6.6788 | 6.8027 | 6.7681 | 6.6419 | 6.7197 | 6.7067 | 6.0140 | 6.1641 | 6.0396 | 6.0267 |   |
| PC 18:2_20:5   | 5.7261 | 5.8098 | 5.4152 | 5.8524 | 5.9895 | 5.4297 | 5.4949 | 5.4985 | 4.9920 | 4.9867 | 4.8832 | 5.0476 |   |
| PC 18:3_20:4   | 4.6160 | 4.8809 | 4.2900 | 4.9098 | 4.9278 | 4.5657 | 4.6400 | 4.5384 | 2.9895 | 4.0094 | 4.0264 | 4.1080 |   |
| PC 18:3_22:6   | 4.9875 | 5.1145 | 4.6283 | 5.1096 | 5.2298 | 4.7474 | 4.7321 | 4.8210 | 3.5159 | 3.6368 | 3.5058 | 3.4603 | x |
| PC 20:0_22:6   | 5.3109 | 5.4337 | 5.1192 | 5.2171 | 5.8526 | 5.0214 | 5.2496 | 5.7305 | 3.9043 | 3.9338 | 3.4536 | 3.4788 | x |
| PC 20:1_20:4   | 6.1133 | 6.0783 | 6.0410 | 6.1519 | 5.9740 | 6.1044 | 6.1341 | 6.1850 | 5.4386 | 5.5382 | 5.3884 | 5.3545 |   |
| PC 20:1_22:6   | 5.8585 | 5.8011 | 5.8006 | 5.8230 | 5.7710 | 5.9973 | 5.8241 | 5.9144 | 3.0962 | 4.2615 | 4.4688 | 3.5135 | x |
| PC 20:2_20:4   | 5.6996 | 4.9960 | 4.8101 | 5.7318 | 5.3811 | 5.8022 | 5.4931 | 5.0257 | 3.3941 | 3.5735 | 2.6956 | 3.6072 |   |
| PC 20:3_20:4   | 5.8951 | 5.8894 | 5.8035 | 5.8528 | 5.6563 | 5.7717 | 5.8178 | 5.9616 | 5.2559 | 5.4344 | 5.2211 | 5.2300 |   |
| PC 20:3_22:6   | 5.0745 | 5.0759 | 5.2259 | 5.1887 | 5.2361 | 5.2893 | 5.2363 | 5.2997 | 4.0509 | 4.4360 | 3.5122 | 4.4089 | x |
| PC 20:4_22:6   | 5.9167 | 5.9334 | 5.7519 | 5.8554 | 5.9414 | 5.8395 | 5.8095 | 5.9196 | 4.0445 | 4.1420 | 4.1047 | 3.8546 | x |
| PC 22:6_22:6   | 4.8618 | 4.9061 | 4.6584 | 4.8272 | 4.9015 | 4.8364 | 4.7687 | 4.7823 | 3.9594 | 3.9594 | 3.9594 | 3.9594 | x |
| PC 30:0        | 4.9176 | 4.8918 | 4.9855 | 4.9077 | 4.9143 | 4.9467 | 5.0079 | 5.0041 | 4.7879 | 4.8423 | 4.7261 | 4.7644 |   |
| PC 31:1        | 3.5942 | 3.6497 | 3.8973 | 3.9419 | 4.0130 | 3.2555 | 3.8091 | 4.2533 | 3.5180 | 3.1162 | 3.0486 | 3.2399 |   |
| PC 33:1        | 5.3376 | 5.2177 | 5.5670 | 5.2982 | 5.3547 | 5.4528 | 5.4959 | 5.5192 | 5.1822 | 5.3188 | 4.9814 | 5.2023 |   |
| PC 35:1        | 5.5242 | 5.5018 | 5.6401 | 5.4939 | 5.4870 | 5.5918 | 5.6458 | 5.6052 | 5.4053 | 5.4713 | 5.3065 | 5.3610 |   |
| PC 35:2        | 5.7421 | 5.7480 | 5.7654 | 5.7962 | 6.0928 | 5.6474 | 5.8029 | 5.7787 | 5.5554 | 5.5339 | 5.4471 | 5.5288 |   |
| PC 35:2_1      | 5.3649 | 5.3122 | 5.4812 | 5.2806 | 5.4962 | 5.4614 | 5.4986 | 5.4611 | 5.0661 | 4.9926 | 4.8128 | 5.0362 |   |
| PC 35:4        | 5.1432 | 5.2469 | 5.3054 | 5.3144 | 5.3886 | 5.1808 | 5.3519 | 5.3508 | 5.0139 | 4.9785 | 4.9228 | 4.9477 |   |

|              |        |        |        |        |        |        |        |        |        |        |        |        |
|--------------|--------|--------|--------|--------|--------|--------|--------|--------|--------|--------|--------|--------|
| PC 36:6      | 4.7669 | 4.8225 | 4.7246 | 4.7948 | 4.8109 | 4.7357 | 4.7459 | 4.8263 | 2.9703 | 3.8038 | 3.1988 | 3.6644 |
| PC 37:5      | 5.1140 | 5.2090 | 5.1838 | 5.2194 | 4.6882 | 5.1978 | 5.2343 | 5.2563 | 3.9893 | 3.9893 | 3.9893 | 3.9893 |
| PC 38:5      | 6.4762 | 6.4601 | 6.7276 | 6.5036 | 6.2806 | 6.6154 | 6.7042 | 6.6674 | 5.8024 | 5.8450 | 5.2700 | 5.7362 |
| PC 38:7      | 5.5852 | 5.6669 | 5.4392 | 5.6185 | 5.4766 | 5.5887 | 5.5817 | 5.7249 | 3.7456 | 3.9920 | 3.3110 | 3.5071 |
| PC 38:7_1    | 4.9949 | 5.2056 | 5.0013 | 5.0704 | 4.7250 | 4.9927 | 5.1529 | 5.3851 | 2.4478 | 3.5776 | 3.4800 | 3.1465 |
| PC 39:4      | 5.0119 | 5.1474 | 4.8270 | 5.1005 | 5.4115 | 5.1501 | 5.2373 | 5.3587 | 3.9299 | 4.2701 | 3.8778 | 3.7832 |
| PC 39:5      | 4.8886 | 4.7591 | 4.8114 | 4.9384 | 4.7878 | 4.9236 | 4.8649 | 4.8282 | 4.3370 | 4.4418 | 4.2848 | 4.3496 |
| PC 40:4_1    | 4.8231 | 4.8306 | 4.6253 | 4.7385 | 5.4893 | 5.0046 | 4.6535 | 5.3471 | 4.2485 | 4.7719 | 3.8334 | 4.3047 |
| PC 40:5      | 6.1079 | 6.0783 | 6.0410 | 6.1500 | 5.9826 | 6.0707 | 6.1341 | 6.1869 | 5.4370 | 5.5052 | 5.3966 | 5.3524 |
| PC 40:6      | 5.6474 | 5.0938 | 6.0150 | 5.1292 | 5.1674 | 5.8940 | 5.8773 | 5.8354 | 4.5470 | 4.6986 | 4.8034 | 4.2404 |
| PC 40:6_1    | 5.6330 | 5.6694 | 5.3987 | 5.4610 | 5.5679 | 5.3877 | 5.5429 | 5.5400 | 3.9791 | 4.2505 | 3.2802 | 4.0197 |
| PC 40:7      | 5.5699 | 5.5239 | 5.4337 | 5.5192 | 5.3172 | 5.4458 | 5.5277 | 5.6687 | 4.8197 | 5.0750 | 4.7346 | 4.8689 |
| PC 40:8      | 6.3266 | 6.3687 | 6.2446 | 6.3460 | 6.4059 | 6.2898 | 6.2787 | 6.3757 | 4.9441 | 5.1769 | 4.9545 | 4.9114 |
| PC 40:9      | 4.3582 | 4.4495 | 4.0762 | 3.9817 | 4.6134 | 4.1337 | 4.0896 | 3.9887 | 2.9286 | 2.9095 | 3.2826 | 3.5231 |
| PC 41:6      | 4.9881 | 5.0386 | 5.0265 | 5.0311 | 5.2047 | 5.0752 | 5.0568 | 5.0991 | 3.8498 | 3.4268 | 3.3844 | 3.4888 |
| PC 41:7      | 4.5174 | 4.1364 | 4.5487 | 4.0923 | 2.7886 | 4.6376 | 4.4493 | 4.5673 | 3.3877 | 3.3692 | 3.0339 | 2.8687 |
| PC 42:10     | 5.2518 | 5.2701 | 5.1006 | 5.2167 | 5.2572 | 5.1496 | 5.1570 | 5.2643 | 3.5516 | 2.9991 | 2.3006 | 3.0599 |
| PC 42:4      | 4.0474 | 3.8141 | 3.0058 | 4.1925 | 4.4146 | 4.0958 | 3.7780 | 4.3354 | 3.3556 | 3.1949 | 3.4365 | 3.0972 |
| PC 42:6      | 4.5590 | 4.6178 | 4.3367 | 4.4803 | 5.1249 | 4.4156 | 4.5515 | 4.7646 | 2.3225 | 2.3225 | 3.0211 | 2.3225 |
| PC 42:6_1    | 4.3272 | 4.0637 | 3.6431 | 4.3495 | 4.0214 | 4.4671 | 4.2635 | 4.2923 | 3.4647 | 3.1618 | 3.2853 | 3.7677 |
| PC 42:7      | 5.3880 | 5.3213 | 5.3028 | 5.3824 | 5.1054 | 5.4345 | 5.3998 | 5.4292 | 4.2321 | 3.9971 | 3.7723 | 3.7156 |
| PC 42:9      | 4.6628 | 4.8076 | 4.4104 | 4.6361 | 4.7822 | 4.4374 | 4.6907 | 3.6542 | 3.4786 | 3.7007 | 3.4403 | 2.7414 |
| PC 44:4      | 4.0949 | 3.5523 | 3.8841 | 3.6045 | 3.9147 | 3.9825 | 3.8671 | 4.2031 | 3.2243 | 3.3384 | 2.9295 | 2.9903 |
| PE 16:0_16:1 | 4.3654 | 4.1962 | 4.5604 | 4.1896 | 4.2479 | 4.3142 | 4.4111 | 4.2100 | 5.1139 | 5.0865 | 4.9437 | 5.1859 |
| PE 16:0_18:1 | 5.7126 | 5.6481 | 5.8605 | 5.6537 | 5.5601 | 5.7585 | 5.8538 | 5.6560 | 6.3081 | 6.3958 | 6.1731 | 6.2754 |
| PE 16:0_18:2 | 6.0999 | 6.1099 | 6.0864 | 6.1734 | 6.3067 | 5.9862 | 6.1257 | 6.0097 | 6.5370 | 6.4963 | 6.4005 | 6.5285 |
| PE 16:0_18:3 | 4.8024 | 4.6706 | 4.8041 | 4.8595 | 4.9679 | 4.5581 | 4.9396 | 4.8486 | 4.4595 | 3.5533 | 3.5533 | 4.2523 |
| PE 16:0_20:3 | 6.2399 | 6.2202 | 6.4052 | 6.2455 | 6.2391 | 6.2375 | 6.4361 | 6.4575 | 6.0568 | 6.0966 | 5.8590 | 5.9792 |

|                |        |        |        |        |        |        |        |        |        |        |        |        |   |
|----------------|--------|--------|--------|--------|--------|--------|--------|--------|--------|--------|--------|--------|---|
| PE 16:0_20:4_1 | 4.8999 | 4.8595 | 4.9232 | 4.9167 | 4.8217 | 4.8981 | 4.9945 | 5.0411 | 4.7425 | 4.8391 | 4.6918 | 4.6659 |   |
| PE 16:0_22:5   | 5.5198 | 5.4506 | 5.7901 | 5.4494 | 4.9125 | 5.7062 | 5.8042 | 5.6366 | 5.0569 | 5.1068 | 5.0868 | 5.1115 |   |
| PE 16:0_22:6   | 6.6697 | 6.8194 | 6.6518 | 6.7595 | 6.7899 | 6.7311 | 6.8044 | 6.7699 | 5.0445 | 5.4404 | 4.9655 | 5.0496 | x |
| PE 16:1_20:4   | 4.9201 | 4.9834 | 4.8771 | 4.9737 | 5.1704 | 4.8583 | 5.0272 | 4.9932 | 4.5207 | 4.6228 | 4.3890 | 4.4692 |   |
| PE 17:0_20:4   | 4.7465 | 4.7933 | 4.7954 | 4.8114 | 4.8707 | 4.7481 | 4.9002 | 4.8504 | 4.2714 | 4.4129 | 4.1652 | 4.1312 |   |
| PE 17:1_22:6   | 4.7752 | 4.9316 | 4.8060 | 4.9311 | 4.9207 | 4.9751 | 4.9629 | 4.8938 | 3.7419 | 3.9581 | 3.3957 | 3.5585 | x |
| PE 18:0_16:1   | 5.0566 | 4.9542 | 4.7964 | 5.0147 | 4.2686 | 4.4566 | 4.8488 | 5.0500 | 5.2845 | 5.2924 | 5.2272 | 5.3082 |   |
| PE 18:0_18:1   | 6.2257 | 6.1778 | 6.3313 | 6.1594 | 6.0123 | 6.2652 | 6.3194 | 6.2818 | 6.4390 | 6.4475 | 6.3888 | 6.4368 |   |
| PE 18:0_18:1_1 | 5.2900 | 5.2751 | 5.3306 | 5.3931 | 5.3285 | 5.2592 | 5.5398 | 5.3004 | 5.6836 | 5.7418 | 5.5238 | 5.5903 |   |
| PE 18:0_20:3_1 | 6.2227 | 6.2352 | 6.3407 | 6.2854 | 6.2524 | 6.2488 | 6.3748 | 6.3792 | 5.8846 | 6.0694 | 5.7755 | 5.8303 |   |
| PE 18:0_20:3_2 | 5.1589 | 4.9908 | 5.2963 | 5.0736 | 4.9877 | 5.2356 | 5.4034 | 5.2318 | 5.5249 | 5.7045 | 5.4499 | 5.4495 |   |
| PE 18:0_20:4   | 6.8004 | 6.9010 | 6.8311 | 6.8622 | 6.7842 | 6.8126 | 6.9447 | 6.9373 | 6.4804 | 6.6729 | 6.3926 | 6.4036 |   |
| PE 18:0_20:4_1 | 6.1745 | 6.2495 | 6.2623 | 6.2690 | 6.1895 | 6.2088 | 6.3254 | 6.3483 | 5.6707 | 5.7459 | 5.6160 | 5.6256 |   |
| PE 18:0_22:6   | 6.2743 | 6.4432 | 6.2056 | 6.3343 | 6.3565 | 6.3033 | 6.4035 | 6.3958 | 4.7327 | 4.9008 | 4.5103 | 4.6990 | x |
| PE 18:0_22:6_1 | 6.0718 | 6.2175 | 6.0802 | 6.1703 | 6.0996 | 6.0899 | 6.1598 | 6.2454 | 4.4072 | 4.2395 | 3.8546 | 4.4202 | x |
| PE 18:1_18:2   | 6.1317 | 6.0992 | 6.0290 | 6.1747 | 6.1776 | 6.0403 | 6.0879 | 5.9522 | 6.4082 | 6.4705 | 6.2685 | 6.3509 |   |
| PE 18:1_20:3   | 5.7452 | 5.7784 | 5.9691 | 5.9088 | 5.7302 | 5.8394 | 6.0533 | 6.0078 | 5.6525 | 5.8156 | 5.4558 | 5.6143 |   |
| PE 18:1_20:4_1 | 4.8086 | 5.0930 | 4.8596 | 4.9203 | 4.9764 | 4.9662 | 4.7976 | 4.9605 | 3.8276 | 3.9027 | 3.6919 | 2.9930 |   |
| PE 18:1_22:6   | 6.3505 | 6.4235 | 6.1687 | 6.3485 | 6.1600 | 6.3676 | 6.3290 | 6.2775 | 4.8318 | 5.1652 | 4.7781 | 4.7200 | x |
| PE 18:2_20:2   | 5.9493 | 6.0033 | 6.0084 | 5.9439 | 5.9946 | 5.9709 | 6.0977 | 6.1369 | 5.7754 | 5.9154 | 5.5102 | 5.7156 |   |
| PE 18:2_20:4   | 6.1365 | 6.0798 | 5.9417 | 6.1500 | 6.0224 | 5.9329 | 6.0618 | 6.0717 | 5.8705 | 6.0300 | 5.5514 | 5.6795 |   |
| PE 19:0_18:2   | 4.6836 | 4.5948 | 4.5865 | 4.7497 | 4.8532 | 4.6043 | 4.6987 | 4.8510 | 5.1296 | 4.8536 | 4.9754 | 5.1254 |   |
| PE 20:0_18:1   | 5.9324 | 5.8773 | 5.9540 | 5.8841 | 5.5253 | 5.9382 | 5.9683 | 5.9718 | 6.1587 | 6.2726 | 6.1141 | 6.1449 |   |
| PE 20:0_20:3_1 | 4.4482 | 4.3906 | 4.6279 | 4.7390 | 5.2845 | 5.1752 | 4.6185 | 4.5287 | 5.2051 | 5.4714 | 5.3403 | 5.0995 |   |
| PE 20:0_20:4   | 6.0446 | 6.1434 | 5.9204 | 6.1920 | 6.0158 | 5.9844 | 6.1211 | 6.1743 | 5.3588 | 5.4468 | 5.0869 | 5.3938 |   |
| PE 20:0_22:4   | 5.5151 | 5.3910 | 5.4765 | 5.5502 | 5.9871 | 4.7981 | 5.7948 | 5.7994 | 4.5550 | 4.2417 | 4.2614 | 4.6571 |   |
| PE 20:1_18:2   | 5.7448 | 5.6987 | 5.7326 | 5.6890 | 5.6848 | 5.7291 | 5.7513 | 5.6364 | 5.5864 | 5.6634 | 5.5505 | 5.6020 |   |
| PE 20:1_20:3   | 5.9999 | 6.0789 | 6.0696 | 6.1123 | 6.2144 | 6.1035 | 6.1306 | 6.1777 | 5.3494 | 5.3044 | 5.1139 | 5.2722 |   |

|                |        |        |        |        |        |        |        |        |        |        |        |        |   |
|----------------|--------|--------|--------|--------|--------|--------|--------|--------|--------|--------|--------|--------|---|
| PE 20:1_20:4   | 5.6355 | 5.6644 | 5.6993 | 5.6998 | 5.4599 | 5.7187 | 5.7295 | 5.7079 | 5.0446 | 5.4888 | 5.4043 | 5.3812 |   |
| PE 20:1_22:6   | 5.4857 | 5.5003 | 5.2412 | 5.3720 | 4.8745 | 5.5589 | 5.0221 | 5.4277 | 4.6135 | 4.5354 | 4.3981 | 4.6161 | x |
| PE 20:2_20:4   | 5.3794 | 5.5690 | 5.4311 | 5.5587 | 5.5961 | 5.3704 | 5.4409 | 5.5917 | 4.5790 | 4.5579 | 4.6319 | 4.6106 |   |
| PE 20:4_20:4   | 5.1847 | 5.0273 | 4.8707 | 4.5418 | 4.6306 | 3.9518 | 4.0295 | 4.8643 | 3.2528 | 4.3443 | 3.2528 | 3.2528 |   |
| PE 38:6        | 5.2258 | 5.3630 | 5.2797 | 5.2424 | 5.2132 | 5.3169 | 5.2976 | 5.2915 | 2.7215 | 2.7215 | 3.4204 | 2.7215 |   |
| PE 40:5        | 6.4727 | 6.5503 | 6.5705 | 6.5330 | 6.5154 | 6.5271 | 6.6326 | 6.6755 | 5.5305 | 5.6884 | 5.4415 | 5.4658 |   |
| PE 40:7        | 5.0305 | 4.9730 | 5.0370 | 5.2596 | 4.8585 | 4.9450 | 5.0936 | 5.2850 | 3.4004 | 3.9798 | 4.6331 | 3.3415 |   |
| PG 16:0_18:2   | 4.8251 | 5.1152 | 4.8976 | 5.1627 | 5.5182 | 4.9044 | 4.9539 | 5.1008 | 4.7100 | 4.5856 | 4.6143 | 4.7474 |   |
| PI 16:0_16:1   | 4.7754 | 4.8410 | 4.9942 | 4.4316 | 4.8352 | 4.7983 | 4.9499 | 5.1701 | 5.1498 | 5.3484 | 5.1471 | 5.3736 |   |
| PI 16:0_18:1   | 5.4343 | 5.5453 | 5.7817 | 5.4712 | 5.6700 | 5.5553 | 5.6857 | 5.6195 | 6.1669 | 6.1492 | 6.0733 | 6.1912 |   |
| PI 16:0_20:3   | 5.7247 | 5.4530 | 5.9522 | 5.3902 | 4.8619 | 5.7806 | 5.8007 | 5.6247 | 6.4847 | 6.5307 | 6.4036 | 6.4532 |   |
| PI 16:0_20:3_1 | 5.8105 | 5.8381 | 5.7174 | 5.6724 | 5.8881 | 5.6502 | 5.7593 | 5.7265 | 6.1507 | 6.1241 | 6.0410 | 6.1865 |   |
| PI 16:0_22:6   | 5.1428 | 5.4327 | 5.2882 | 5.1535 | 5.5230 | 5.1772 | 5.3254 | 5.3748 | 3.7145 | 3.8253 | 3.8271 | 3.0157 | x |
| PI 17:0_20:4   | 5.8206 | 5.8670 | 5.8501 | 5.8403 | 5.9342 | 5.8266 | 5.8457 | 5.8862 | 5.0873 | 5.0682 | 5.0036 | 5.0707 |   |
| PI 18:0_18:1   | 5.3702 | 5.4299 | 5.5684 | 5.2617 | 5.3894 | 5.4258 | 5.4737 | 5.3397 | 5.9940 | 6.0576 | 5.9244 | 5.9793 |   |
| PI 18:0_18:2_1 | 5.7521 | 5.8987 | 5.9360 | 5.6987 | 6.2999 | 5.7477 | 5.8524 | 5.8139 | 6.3002 | 6.2040 | 6.1860 | 6.1831 |   |
| PI 18:0_20:2   | 5.3688 | 5.1214 | 5.5239 | 5.1495 | 4.9618 | 5.5903 | 5.4242 | 5.3072 | 6.6779 | 6.6510 | 6.6359 | 6.5645 |   |
| PI 18:0_20:3   | 6.6777 | 6.5330 | 6.9092 | 6.4207 | 5.7386 | 6.8201 | 6.8037 | 6.6034 | 7.1945 | 7.2794 | 7.1726 | 7.0981 |   |
| PI 18:0_20:3_1 | 6.5401 | 6.6718 | 6.4407 | 6.4367 | 6.3278 | 6.4760 | 6.5416 | 6.6131 | 6.6590 | 6.8989 | 6.6937 | 6.7734 |   |
| PI 18:0_20:4   | 7.7683 | 7.8459 | 7.4385 | 7.7577 | 7.7244 | 7.7409 | 7.7892 | 7.5190 | 7.4758 | 7.5654 | 7.4314 | 7.5111 |   |
| PI 18:0_22:3   | 4.8939 | 4.7549 | 4.9817 | 4.7872 | 4.2626 | 4.9263 | 4.8479 | 4.9539 | 5.3780 | 5.4797 | 5.3308 | 5.2557 |   |
| PI 18:0_22:5   | 5.4128 | 5.3758 | 5.6837 | 5.2093 | 4.8116 | 5.6296 | 5.5551 | 5.5777 | 4.8884 | 4.9592 | 4.8166 | 4.5558 |   |
| PI 18:0_22:6   | 5.8292 | 6.0629 | 5.7062 | 5.8952 | 6.0387 | 5.8022 | 5.7488 | 5.9305 | 4.4925 | 4.5877 | 4.3804 | 4.5301 | x |
| PI 18:1_20:3   | 5.4744 | 5.5694 | 5.4507 | 5.2701 | 5.1143 | 5.3321 | 5.2735 | 5.4355 | 5.7450 | 5.7862 | 5.6702 | 5.7870 |   |
| PI 18:1_20:4   | 6.9683 | 6.9940 | 6.9701 | 6.9480 | 6.8121 | 6.9673 | 6.9802 | 7.0146 | 6.7303 | 6.8500 | 6.6280 | 6.8035 |   |
| PI 18:1_22:5   | 5.1854 | 5.2823 | 5.1002 | 5.2996 | 5.2032 | 5.1218 | 5.1093 | 5.2236 | 4.3142 | 4.5801 | 4.2205 | 4.5821 |   |
| PI 18:1_22:6   | 4.8214 | 4.8869 | 4.6006 | 4.8153 | 4.7556 | 4.6813 | 4.6853 | 4.7532 | 4.2581 | 4.4231 | 4.0483 | 4.1350 | x |
| PI 18:2_20:4   | 4.6158 | 4.9426 | 5.0279 | 4.8696 | 4.0846 | 4.9975 | 4.9229 | 4.7406 | 2.4821 | 3.8810 | 2.4821 | 3.1801 |   |



|                   |        |        |        |        |        |        |        |        |        |        |        |        |  |
|-------------------|--------|--------|--------|--------|--------|--------|--------|--------|--------|--------|--------|--------|--|
| PI 38:4           | 5.6672 | 5.4201 | 5.8294 | 5.1462 | 4.9968 | 5.7733 | 5.6052 | 5.4852 | 6.2329 | 6.3235 | 6.1801 | 6.1479 |  |
| PI 40:5           | 5.6394 | 5.8146 | 5.4485 | 5.6540 | 5.6861 | 5.5936 | 5.5213 | 5.6284 | 5.2034 | 5.2912 | 5.1699 | 5.1903 |  |
| SM d14:3 28:2     | 5.1742 | 5.2491 | 5.4144 | 5.4791 | 4.8922 | 5.3458 | 5.4336 | 4.8920 | 4.5623 | 4.2855 | 4.3592 | 4.4961 |  |
| SM d15:1 26:0     | 6.4031 | 6.4562 | 6.4216 | 6.5431 | 6.5101 | 6.4110 | 6.5007 | 6.3705 | 6.1072 | 6.1452 | 6.0042 | 6.1562 |  |
| SM d18:1 22:0     | 6.2745 | 6.3992 | 6.2177 | 6.3231 | 6.6252 | 6.2185 | 6.3480 | 6.5238 | 5.9909 | 6.0919 | 5.8991 | 5.9932 |  |
| SM d18:2 23:0     | 6.1160 | 6.1289 | 6.0586 | 6.2359 | 6.3608 | 6.1482 | 6.1886 | 6.1075 | 5.9336 | 5.9099 | 5.8633 | 6.0339 |  |
| SM d32:1          | 5.3783 | 5.3343 | 5.4618 | 5.4597 | 5.2865 | 5.3896 | 5.4595 | 5.3660 | 5.2482 | 5.2159 | 5.1548 | 5.2255 |  |
| SM d33:1          | 5.3532 | 5.2724 | 5.4358 | 5.5934 | 5.5530 | 5.4634 | 5.5009 | 5.3974 | 5.2574 | 5.1254 | 5.0974 | 5.2360 |  |
| SM d34:0          | 5.0618 | 5.0073 | 5.1963 | 5.1697 | 5.1560 | 5.1086 | 5.1722 | 5.2261 | 5.0695 | 5.0771 | 4.9354 | 5.0109 |  |
| SM d34:1          | 6.2398 | 6.2389 | 6.3085 | 6.3369 | 6.1478 | 6.2040 | 6.3706 | 6.3516 | 5.9211 | 6.0065 | 5.8306 | 5.8947 |  |
| SM d34:2          | 6.1774 | 6.1892 | 6.1918 | 6.2340 | 6.2588 | 6.1701 | 6.2369 | 6.2631 | 6.0526 | 6.0910 | 5.9388 | 6.0394 |  |
| SM d35:1          | 3.5993 | 2.9827 | 4.5629 | 4.5320 | 4.5209 | 4.4436 | 4.0583 | 4.5186 | 4.3184 | 4.2809 | 3.7549 | 3.8273 |  |
| SM d36:1          | 5.9156 | 5.9368 | 6.0309 | 6.0023 | 5.8685 | 5.9121 | 6.0725 | 6.0517 | 5.6555 | 5.7163 | 5.5659 | 5.6153 |  |
| SM d38:1          | 5.2434 | 5.6062 | 5.4612 | 5.4921 | 5.5190 | 5.4676 | 5.6233 | 5.6984 | 5.0286 | 5.2009 | 5.0324 | 5.0513 |  |
| SM d39:1          | 5.4654 | 5.5301 | 5.4038 | 5.5896 | 6.0506 | 5.3776 | 5.5329 | 5.5776 | 5.2830 | 5.1782 | 5.1345 | 5.3028 |  |
| SM d39:2          | 5.0755 | 4.9929 | 5.1628 | 5.0429 | 4.3400 | 5.1323 | 4.8957 | 5.0573 | 4.7062 | 4.3340 | 4.2533 | 3.4862 |  |
| SM d40:1_1        | 5.4693 | 5.5962 | 5.4450 | 5.5314 | 5.8036 | 5.3994 | 5.5808 | 5.7316 | 5.1641 | 5.2905 | 5.1135 | 5.1461 |  |
| SM d40:2          | 6.0018 | 6.0648 | 5.9548 | 5.9905 | 6.2891 | 6.0100 | 5.8537 | 6.2623 | 5.6026 | 5.5978 | 5.5330 | 5.6096 |  |
| SM d40:3          | 4.9650 | 5.0279 | 4.8539 | 4.9483 | 5.1863 | 4.9781 | 5.0561 | 5.1221 | 4.7215 | 4.7444 | 4.4449 | 4.7468 |  |
| SM d41:1          | 5.2917 | 5.3220 | 5.3062 | 5.3814 | 5.3827 | 5.2469 | 5.3672 | 5.2233 | 5.0549 | 5.0518 | 4.9140 | 5.0135 |  |
| SM d41:2          | 5.2541 | 5.1537 | 5.1604 | 5.2747 | 5.4038 | 5.1417 | 5.2805 | 4.7572 | 4.9940 | 5.0672 | 4.9325 | 4.4198 |  |
| SM d42:1          | 6.2922 | 6.3346 | 6.2889 | 6.3718 | 6.5158 | 6.2371 | 6.3290 | 6.3182 | 6.0637 | 6.1120 | 5.9245 | 6.0783 |  |
| SM d42:2          | 6.9287 | 6.9275 | 6.9302 | 6.9008 | 6.8500 | 6.9304 | 6.9815 | 6.9617 | 6.7853 | 6.8615 | 6.7550 | 6.7919 |  |
| SM d42:3          | 5.8544 | 5.9513 | 5.8746 | 6.0279 | 5.6223 | 5.8486 | 6.0220 | 6.0846 | 4.8534 | 5.1077 | 4.8059 | 4.7303 |  |
| SM d42:3          | 6.2247 | 6.2325 | 6.1740 | 6.2402 | 6.3575 | 6.2006 | 6.2272 | 6.2402 | 5.9811 | 5.9876 | 5.9400 | 6.0099 |  |
| SM d43:2          | 5.2886 | 5.2640 | 5.2983 | 5.3681 | 5.3053 | 5.2906 | 5.4048 | 5.2456 | 5.1652 | 5.1167 | 4.8685 | 5.1742 |  |
| TG 15:0_16:0_16:1 | 5.8645 | 5.8620 | 5.8719 | 5.8937 | 5.6638 | 5.8623 | 5.9406 | 5.9223 | 5.3939 | 5.5317 | 5.3717 | 5.4295 |  |
| TG 16:0_16:0_16:0 | 5.3225 | 5.2522 | 5.4607 | 5.3069 | 5.3618 | 5.2461 | 5.2977 | 5.3123 | 5.7219 | 5.5681 | 5.5669 | 5.6586 |  |

|                   |        |        |        |        |        |        |        |        |        |        |        |        |   |
|-------------------|--------|--------|--------|--------|--------|--------|--------|--------|--------|--------|--------|--------|---|
| TG 16:0_16:0_18:0 | 4.9119 | 5.2151 | 5.2531 | 5.1505 | 5.2344 | 5.1124 | 4.9314 | 4.9264 | 5.4185 | 5.3783 | 5.1629 | 5.3328 |   |
| TG 16:0_16:0_18:1 | 6.2353 | 6.2738 | 6.4767 | 6.2162 | 6.3717 | 6.2266 | 6.4692 | 6.4241 | 6.9014 | 6.7917 | 6.8031 | 6.8584 |   |
| TG 16:0_16:1_18:1 | 6.3944 | 6.4807 | 6.6242 | 6.4030 | 6.7237 | 6.3514 | 6.6410 | 6.5661 | 6.8035 | 6.6500 | 6.6747 | 6.7897 |   |
| TG 16:0_18:1_18:1 | 7.0946 | 7.1419 | 7.3096 | 7.0541 | 7.1275 | 7.1012 | 7.3759 | 7.2663 | 7.5223 | 7.5098 | 7.4561 | 7.4819 |   |
| TG 16:0_18:1_20:1 | 6.0272 | 6.0297 | 6.1165 | 5.9403 | 6.1242 | 6.0215 | 6.2129 | 6.2191 | 6.4786 | 6.5378 | 6.4438 | 6.3821 |   |
| TG 16:0_18:1_20:4 | 5.7762 | 5.9401 | 6.0025 | 5.8975 | 6.2222 | 5.4617 | 6.0986 | 6.1729 | 5.4876 | 5.4620 | 5.2844 | 5.3968 |   |
| TG 16:0_18:1_22:6 | 5.8533 | 6.1057 | 5.8683 | 5.9774 | 5.2567 | 5.4958 | 5.9706 | 6.1278 | 3.8169 | 3.6700 | 4.2746 | 3.3409 | x |
| TG 16:0_18:2_20:4 | 5.6575 | 5.9127 | 5.7854 | 5.8460 | 6.4201 | 5.2973 | 5.8692 | 5.9937 | 5.1457 | 5.0303 | 4.2578 | 4.6024 |   |
| TG 16:0_18:2_22:6 | 5.4542 | 5.5920 | 5.1900 | 5.7216 | 6.3797 | 5.4511 | 5.3044 | 5.8063 | 4.1623 | 3.4622 | 2.9035 | 3.5215 | x |
| TG 18:1_18:1_20:1 | 5.8423 | 5.7403 | 5.8689 | 5.6748 | 5.9404 | 5.8247 | 5.9512 | 6.0090 | 6.0975 | 6.1639 | 6.0562 | 5.9604 |   |
| TG 18:1_18:1_20:4 | 6.0300 | 6.1043 | 6.0110 | 6.0496 | 6.4393 | 5.9759 | 6.2337 | 6.3024 | 5.5359 | 5.4640 | 5.4097 | 5.4632 |   |
| TG 18:1_18:2_20:4 | 5.0113 | 5.7824 | 5.5508 | 5.7724 | 6.3001 | 4.8227 | 5.4739 | 5.7305 | 5.0653 | 4.7899 | 4.8230 | 4.3935 |   |
| TG 18:1_18:2_22:6 | 5.5084 | 5.6599 | 5.4835 | 5.6283 | 5.9919 | 5.4188 | 5.3516 | 5.6546 | 4.1149 | 3.9903 | 3.6871 | 4.1044 | x |
| TG 18:2_20:1_22:6 | 4.8897 | 3.8527 | 4.4039 | 3.9701 | 5.2283 | 4.6154 | 4.6305 | 5.0640 | 2.9072 | 3.5959 | 3.4189 | 3.8387 | x |
| TG 18:2_22:6_22:6 | 4.1609 | 4.5789 | 3.4378 | 4.6151 | 5.0823 | 3.8187 | 4.0341 | 4.4537 | 2.2221 | 2.9204 | 2.2221 | 2.2221 | x |
| TG 46:2           | 4.6729 | 4.6069 | 4.6690 | 4.6493 | 4.7953 | 4.6267 | 5.1996 | 4.6414 | 5.0877 | 4.9260 | 4.9905 | 5.0655 |   |
| TG 48:0           | 5.4403 | 5.4291 | 5.5784 | 5.4664 | 5.5050 | 5.3596 | 5.4598 | 5.4701 | 5.7902 | 5.6626 | 5.6616 | 5.7368 |   |
| TG 48:1           | 5.3303 | 5.3159 | 5.5775 | 5.2841 | 5.5873 | 4.8200 | 5.6616 | 5.4764 | 5.8753 | 5.7321 | 5.7802 | 5.8904 |   |
| TG 52:1           | 5.4946 | 5.6318 | 5.7702 | 5.5346 | 5.7588 | 5.5336 | 5.7545 | 5.7652 | 6.2382 | 6.2346 | 6.1592 | 6.1441 |   |
| TG 54:1           | 4.9746 | 5.0959 | 4.8095 | 5.0527 | 5.3817 | 4.9305 | 5.0677 | 5.2407 | 5.4743 | 5.3652 | 5.2820 | 5.2517 |   |
| TG 56:8           | 4.7906 | 5.4302 | 5.3243 | 5.4176 | 6.1344 | 4.9869 | 5.0231 | 5.3662 | 4.6982 | 4.6644 | 4.3484 | 4.4124 |   |
| TG 58:10          | 4.9983 | 5.4565 | 5.2696 | 5.4490 | 5.9938 | 5.0777 | 4.9317 | 5.4717 | 3.4240 | 2.9287 | 3.4354 | 3.3926 |   |
| TG 58:10_1        | 4.9983 | 5.4565 | 5.2696 | 5.4490 | 5.9941 | 5.0759 | 4.6716 | 5.4717 | 3.3561 | 2.9187 | 3.4284 | 3.4010 |   |
| TG 58:6           | 5.2535 | 4.9771 | 5.3985 | 4.7996 | 5.8158 | 5.3258 | 5.5350 | 5.6156 | 4.7396 | 5.1223 | 4.7539 | 4.6364 |   |
| TG 58:7           | 5.5475 | 5.7858 | 5.6057 | 5.3933 | 5.6342 | 4.7918 | 5.8098 | 5.4337 | 5.1733 | 4.8431 | 4.8137 | 4.7093 |   |
| TG 58:8           | 5.7440 | 5.8927 | 5.7088 | 5.8318 | 5.8370 | 5.5938 | 5.7356 | 6.0030 | 4.3982 | 4.4250 | 3.9102 | 3.4702 |   |
| TG 60:10          | 4.2138 | 4.3622 | 4.7348 | 4.8323 | 4.9597 | 2.8967 | 4.8873 | 5.1110 | 3.7150 | 3.1435 | 3.0797 | 2.1984 |   |
| TG 60:12          | 4.3816 | 5.0802 | 4.4972 | 5.0790 | 5.5434 | 4.4081 | 3.8638 | 5.0259 | 2.2377 | 2.2377 | 2.2377 | 2.9361 |   |

|          |        |        |        |        |        |        |        |        |        |        |        |        |  |
|----------|--------|--------|--------|--------|--------|--------|--------|--------|--------|--------|--------|--------|--|
| TG 62:13 | 4.4709 | 4.8513 | 4.1658 | 4.8638 | 4.9869 | 3.8836 | 4.0590 | 4.3046 | 2.9676 | 2.9574 | 2.2590 | 3.0249 |  |
| TG 62:14 | 4.1609 | 4.5789 | 3.4204 | 4.6151 | 5.0827 | 3.8185 | 4.0144 | 4.4526 | 2.2317 | 2.9300 | 2.2317 | 2.2317 |  |

Red denotes upregulation, blue denotes downregulation.

**Supplementary Table 11: Primers Used in this Study.**

| Gene          | Forward Primer            | Reverse Primer           |
|---------------|---------------------------|--------------------------|
| <i>Fads1</i>  | GAAGAAGCACATGCCATACAACC   | TCCGCTGAACCACAAAATAGAAA  |
| <i>Fads2</i>  | GCCTGGTTCATCCTCTCGTACTT   | GAAAGGTGGCCATAGTCATGTTG  |
| <i>Elovl2</i> | AGCTGCCATGCCCTTTCTGA      | CCCTGGGGCTCTGTTGATTATG   |
| <i>Elovl5</i> | ATGGAACATTTTCGATGCGTCA    | GTCCCAGCCATACAATGAGTAAG  |
| <i>Abcd2</i>  | GTTCAAAGAGAAGGAGGATGGGATG | TGCTCACGGCACTGGTACATTC   |
| <i>Rplp0</i>  | GGACCCGAGAAGACCTCCTT      | GCACATCACTCAGAATTTCAATGG |

**Supplementary Table 12: Antibodies used for Western blot analysis in this study.**

| Antibody           | Catalogue Number | Company                     | Antibody Dilution |
|--------------------|------------------|-----------------------------|-------------------|
| anti-ACOX1         | #10957-1-AP      | Proteintech                 | 1:1000            |
| anti-HSD17B4/DBP   | #15116-1-AP      | Proteintech                 | 1:1000            |
| anti-ACAA1         | #12319-1-AP      | Proteintech                 | 1:1000            |
| anti-SCP2/SCPx     | #23006-1-AP      | Proteintech                 | 1:1000            |
| anti-PEX14         | #10594-1-AP      | Proteintech                 | 1:500             |
| anti-PMP70         | #ab3421          | Abcam                       | 1:1000            |
| anti-CAT           | #C0979           | Sigma-Aldrich               | 1:2000            |
| anti-CYP4A10       | #PA3-033         | Thermo Scientific           | 1:1000            |
| anti-CPT1A         | #ab128568        | Abcam                       | 1:1000            |
| anti-CACT/SLC25A20 | #19363-1-AP      | Proteintech                 | 1:1000            |
| anti-CPT2          | #26555-1-AP      | Proteintech                 | 1:1000            |
| anti-ECHS1         | #ab153732        | Abcam                       | 1:1000            |
| anti-ACSF3         | #PA525803        | Thermo Fisher Scientific    | 1:500             |
| anti-MLYCD         | #ab95945         | Abcam                       | 1:500             |
| anti-SLC25A1       | #15235-1-AP      | Proteintech                 | 1:1000            |
| anti-APOB          | #AB742           | Millipore Sigma             | 1:1000            |
| anti-APOA1         | #11A-G2b         | Academy Bio-Medical         | 1:200             |
| anti-ACTB          | #4970S           | Cell Signaling Technologies | 1:500             |
| anti-TUB           | #3873S           | Cell Signaling Technologies | 1:1000            |
| anti-GAPDH         | #MCA-1D4         | EnCor Biotechnology         | 1:2000            |
| anti-VIN           | #sc-25336        | Santa Cruz Biotechnologies  | 1:500             |
| anti-transferrin   | #A80-128A        | Bethyl Laboratories         | 1:1000            |
| anti-HSC70         | #sc-7298         | Santa Cruz Biotechnology    | 1:1000            |
| anti-PLIN2         | #GP40S           | Progen                      | 1:200             |
