# Supplementary material for: Transmembrane protein 135 regulates lipid homeostasis through its role in peroxisomal DHA metabolism
Source: PubMed Central journal article supplement (PMC9813353; doi:10.1038/s42003-022-04404-7), 2023-01-04
Supplement: 42003_2022_4404_MOESM3_ESM.pdf [file 42003_2022_4404_MOESM3_ESM.pdf]

## **Description of Additional Supplementary Files**

File name: Supplementary Data 1

Description: The source data behind the graphs and tables in the paper.
