# Supplementary material for: Transmembrane protein 135 regulates lipid homeostasis through its role in peroxisomal DHA metabolism
Source: PubMed Central journal article supplement (PMC9813353; doi:10.1038/s42003-022-04404-7), 2023-01-04
Supplement: 42003_2022_4404_MOESM5_ESM.pdf [file 42003_2022_4404_MOESM5_ESM.pdf]

## Reporting Summary

Nature Portfolio wishes to improve the reproducibility of the work that we publish. This form provides structure for consistency and transparency in reporting. For further information on Nature Portfolio policies, see our [Editorial Policies](#) and the [Editorial Policy Checklist](#).

### Statistics

For all statistical analyses, confirm that the following items are present in the figure legend, table legend, main text, or Methods section.

- | n/a                                 | Confirmed                                                                                                                                                                                                                                                                                      |
|-------------------------------------|------------------------------------------------------------------------------------------------------------------------------------------------------------------------------------------------------------------------------------------------------------------------------------------------|
| <input type="checkbox"/>            | <input checked="" type="checkbox"/> The exact sample size ( $n$ ) for each experimental group/condition, given as a discrete number and unit of measurement                                                                                                                                    |
| <input type="checkbox"/>            | <input checked="" type="checkbox"/> A statement on whether measurements were taken from distinct samples or whether the same sample was measured repeatedly                                                                                                                                    |
| <input type="checkbox"/>            | <input checked="" type="checkbox"/> The statistical test(s) used AND whether they are one- or two-sided<br><i>Only common tests should be described solely by name; describe more complex techniques in the Methods section.</i>                                                               |
| <input checked="" type="checkbox"/> | <input type="checkbox"/> A description of all covariates tested                                                                                                                                                                                                                                |
| <input type="checkbox"/>            | <input checked="" type="checkbox"/> A description of any assumptions or corrections, such as tests of normality and adjustment for multiple comparisons                                                                                                                                        |
| <input type="checkbox"/>            | <input checked="" type="checkbox"/> A full description of the statistical parameters including central tendency (e.g. means) or other basic estimates (e.g. regression coefficient) AND variation (e.g. standard deviation) or associated estimates of uncertainty (e.g. confidence intervals) |
| <input type="checkbox"/>            | <input checked="" type="checkbox"/> For null hypothesis testing, the test statistic (e.g. $F$ , $t$ , $r$ ) with confidence intervals, effect sizes, degrees of freedom and $P$ value noted<br><i>Give <math>P</math> values as exact values whenever suitable.</i>                            |
| <input checked="" type="checkbox"/> | <input type="checkbox"/> For Bayesian analysis, information on the choice of priors and Markov chain Monte Carlo settings                                                                                                                                                                      |
| <input checked="" type="checkbox"/> | <input type="checkbox"/> For hierarchical and complex designs, identification of the appropriate level for tests and full reporting of outcomes                                                                                                                                                |
| <input checked="" type="checkbox"/> | <input type="checkbox"/> Estimates of effect sizes (e.g. Cohen's $d$ , Pearson's $r$ ), indicating how they were calculated                                                                                                                                                                    |

*Our web collection on [statistics for biologists](#) contains articles on many of the points above.*

### Software and code

Policy information about [availability of computer code](#)

Data collection

Data analysis

For manuscripts utilizing custom algorithms or software that are central to the research but not yet described in published literature, software must be made available to editors and reviewers. We strongly encourage code deposition in a community repository (e.g. GitHub). See the Nature Portfolio [guidelines for submitting code & software](#) for further information.

### Data

Policy information about [availability of data](#)

All manuscripts must include a [data availability statement](#). This statement should provide the following information, where applicable:

- Accession codes, unique identifiers, or web links for publicly available datasets
- A description of any restrictions on data availability
- For clinical datasets or third party data, please ensure that the statement adheres to our [policy](#)

All data including Western blot images is included in our excel spreadsheet containing the raw data from this study. All lipidomics data used for the Metaboanalyst 5.0 program is publicly available on the Dryad public database (doi:10.5061/dryad.vx0k6djvm). Upon request, the raw mass spectrometry data will be given to those who are interested.

## Field-specific reporting

Please select the one below that is the best fit for your research. If you are not sure, read the appropriate sections before making your selection.

- Life sciences       Behavioural & social sciences       Ecological, evolutionary & environmental sciences

For a reference copy of the document with all sections, see [nature.com/documents/nr-reporting-summary-flat.pdf](https://www.nature.com/documents/nr-reporting-summary-flat.pdf)

## Life sciences study design

All studies must disclose on these points even when the disclosure is negative.

|                 |                                                                                                                                                                                             |
|-----------------|---------------------------------------------------------------------------------------------------------------------------------------------------------------------------------------------|
| Sample size     | We used the G*Power application to determine sample sizes that would give us statistical power for 95% confidence with 80% power with an average standard deviation of 25%.                 |
| Data exclusions | No data was excluded in this study.                                                                                                                                                         |
| Replication     | All experiments were repeated at least twice and yielded the same conclusions.                                                                                                              |
| Randomization   | When possible, data and tissue samples were collected from all genotypes and genders of mice in this study. Samples were randomly chosen from each genotype and gender for each experiment. |
| Blinding        | Investigators were only blinded when determining NAFLD severity scores of liver sections.                                                                                                   |

## Reporting for specific materials, systems and methods

We require information from authors about some types of materials, experimental systems and methods used in many studies. Here, indicate whether each material, system or method listed is relevant to your study. If you are not sure if a list item applies to your research, read the appropriate section before selecting a response.

### Materials & experimental systems

| n/a                                 | Involved in the study                                           |
|-------------------------------------|-----------------------------------------------------------------|
| <input type="checkbox"/>            | <input checked="" type="checkbox"/> Antibodies                  |
| <input type="checkbox"/>            | <input checked="" type="checkbox"/> Eukaryotic cell lines       |
| <input checked="" type="checkbox"/> | <input type="checkbox"/> Palaeontology and archaeology          |
| <input type="checkbox"/>            | <input checked="" type="checkbox"/> Animals and other organisms |
| <input checked="" type="checkbox"/> | <input type="checkbox"/> Human research participants            |
| <input checked="" type="checkbox"/> | <input type="checkbox"/> Clinical data                          |
| <input checked="" type="checkbox"/> | <input type="checkbox"/> Dual use research of concern           |

### Methods

| n/a                                 | Involved in the study                           |
|-------------------------------------|-------------------------------------------------|
| <input checked="" type="checkbox"/> | <input type="checkbox"/> ChIP-seq               |
| <input checked="" type="checkbox"/> | <input type="checkbox"/> Flow cytometry         |
| <input checked="" type="checkbox"/> | <input type="checkbox"/> MRI-based neuroimaging |

## Antibodies

### Antibodies used

The following antibodies were used in this study:

| Primary Antibodies | Supplier Name       | Catalog Number | Lot Number  | Application |
|--------------------|---------------------|----------------|-------------|-------------|
| anti-ACOX1         | Proteintech         | 10957-1-AP     | N/A         | Western     |
| anti-HSD17B4/DBP   | Proteintech         | 15116-1-AP     | 00092793    | Western     |
| anti-ACAA1         | Proteintech         | 12319-1-AP     | N/A         | Western     |
| anti-SCP2/SCPx     | Proteintech         | 23006-1-AP     | N/A         | Western     |
| anti-CAT           | Sigma-Aldrich       | C0979          | 059M4838V   | Western     |
| anti-CYP4A10       | Invitrogen          | PA3-033        | XG361352    | Western     |
| anti-CPT1A         | Abcam               | ab128568       | GR3252377-2 | Western     |
| anti-CACT/SLC25A20 | Proteintech         | 19363-1-AP     | 00059541    | Western     |
| anti-CPT2          | Proteintech         | 26555-1-AP     | N/A         | Western     |
| anti-ECHS1         | Abcam               | ab153732       | GR125011-5  | Western     |
| anti-ACSF3         | Thermo Fisher       | PA525803       | VA2920924   | Western     |
| anti-MLYCD         | Abcam               | ab95945        | GR187607-35 | Western     |
| anti-SLC25A1       | Proteintech         | 15235-1-AP     | N/A         | Western     |
| anti-PMP70         | Abcam               | ab3421         | GR3386502-1 | Western/IHC |
| anti-PEX14         | Proteintech         | 10594-1-AP     | 00058233    | Western/IHC |
| anti-APOB          | Millipore-Sigma     | AB742          | 2788897     | Western     |
| anti-APOA1         | Academy Bio-Medical | 11A-G2b        | 012075      | Western     |
| anti-PLIN2         | Progen              | GP40S          | 802261S     | Western     |
| anti-TUB           | CST                 | 3873S          | 16          | Western     |
| anti-ACTB          | CST                 | 4970S          | 18          | Western     |

|                                  |                     |                |            |                                                 |
|----------------------------------|---------------------|----------------|------------|-------------------------------------------------|
| anti-HSC70                       | Santa Cruz          | sc-7298        | D2121      | Western                                         |
| anti-GAPDH                       | EnCor               | MCA-1D4        | 82219      | Western                                         |
| anti-transferrin                 | Bethyl Laboratories | A80-128A       | N/A        | Western                                         |
| Secondary Antibodies             | Supplier Name       | Catalog Number | Lot Number | Application                                     |
| Donkey anti-Rabbit IgG 680RD     | LI-COR              | 926-68073      | D10113-05  | For Rabbit Polyclonal Primary Antibody Westerns |
| Donkey anti-Rabbit IgG 800CW     | LI-COR              | 926-32213      | D01216-10  | For Rabbit Polyclonal Primary Antibody Westerns |
| Donkey anti-Guinea Pig IgG 800CW | LI-COR              | 925-32411      | D10203-01  | For PLIN2 Westerns                              |
| Donkey anti-Goat IgG 680RD       | LI-COR              | 926-68074      | C30826-01  | For APOB, APOA, and transferrin Westerns        |
| Goat anti-Mouse IgG1 800CW       | LI-COR              | 926-32350      | C90910-25  | For TUB and CAT Westerns                        |
| Goat anti-Mouse IgG2a 800CW      | LI-COR              | 926-32351      | C90904-05  | For HSC70 Westerns                              |
| Goat anti-Mouse IgM 800CW        | LI-COR              | 925-32280      | D00421-03  | For GAPDH Western                               |
| Donkey anti-Rabbit 488 IgG       | Invitrogen          | A21206         | 1981155    | For PMP70 and PEX14 IHC                         |
| Donkey anti-Rabbit 568 IgG       | Invitrogen          | A10042         | N/A        | For PMP70 IHC of murine fibroblasts             |

## Validation

We chose the antibodies used in this study based on either if the antibody was validated by a knockout/knockdown model, manufacturer's website, previous publication, or the antibody database, [www.citeab.com](http://www.citeab.com). Specifically, we chose to use the following antibodies for these reasons:

|                    |                                                                                              |
|--------------------|----------------------------------------------------------------------------------------------|
| anti-ACOX1         | Validated using Acox1 KO mouse livers (PMID: 32473093)                                       |
| anti-HSD17B4/DBP   | Validated using HSD17B4 knockdown cells (manufacturer's website)                             |
| anti-ACAA1         | Routinely used in publications evaluating peroxisome proteins                                |
| anti-SCP2/SCPx     | Validated by SCP2/SCPx knockdown (manufacturer's website)                                    |
| anti-CAT           | Validated using Pex5 KO Schwann Cells that shows diffuse catalase staining (PMID: 28470148)  |
| anti-CYP4A10       | Used with mouse liver samples (PMID:33450224)                                                |
| anti-CPT1A         | Validated using Cpt1a KO HAP1 cells (manufacturer's website)                                 |
| anti-CACT/SLC25A20 | Used with Mouse liver samples (PMID: 29116185)                                               |
| anti-CPT2          | Used with Mouse liver samples (PMID: 34564857)                                               |
| anti-ECHS1         | Validated using Echs1 Deficient Human Fibroblasts (PMID: 26251176)                           |
| anti-ACSF3         | Validated using Acsf3 KO Human Fibroblasts (PMID: 28479296)                                  |
| anti-MLYCD         | Used with Mouse liver samples (PMID: 30201971)                                               |
| anti-SLC25A1       | Validated using Slc25a1 knockdown mouse NIH/3T3 mouse fibroblast cells (PMID: 32134147)      |
| anti-PMP70         | Routinely used to detect PMP70 on Western blots and tissue sections (manufacturer's website) |
| anti-PEX14         | Routinely used to detect PEX14 on Western blots and tissue sections (manufacturer's website) |
| anti-APOB          | Used previously with mouse plasmas (PMID: 30808757)                                          |
| anti-APOA1         | Used previously with mouse plasmas (PMID: 30808757)                                          |
| anti-PLIN2         | Used with Mouse MLTC-1 cells (PMID: 27554864)                                                |
| anti-TUB           | Routinely used as loading control ( <a href="http://www.citeab.com">www.citeab.com</a> )     |
| anti-ACTB          | Routinely used as loading control ( <a href="http://www.citeab.com">www.citeab.com</a> )     |
| anti-HSC70         | Routinely used as loading control ( <a href="http://www.citeab.com">www.citeab.com</a> )     |
| anti-GAPDH         | Routinely used as loading control ( <a href="http://www.citeab.com">www.citeab.com</a> )     |
| anti-transferrin   | Routinely used as loading control ( <a href="http://www.citeab.com">www.citeab.com</a> )     |

## Eukaryotic cell lines

Policy information about [cell lines](#)

|                                                                   |                                                                                                                                                |
|-------------------------------------------------------------------|------------------------------------------------------------------------------------------------------------------------------------------------|
| Cell line source(s)                                               | Mouse fibroblasts were cultured from WT, Tmem135 TG, and Tmem135 mutant (FUN025) mouse ears as described in the Materials and Methods Section. |
| Authentication                                                    | The cultures were not authenticated with staining for fibroblast markers.                                                                      |
| Mycoplasma contamination                                          | All cell lines tested negative for Mycoplasma contamination.                                                                                   |
| Commonly misidentified lines (See <a href="#">ICLAC</a> register) | N/A                                                                                                                                            |

## Animals and other organisms

Policy information about [studies involving animals](#); [ARRIVE guidelines](#) recommended for reporting animal research

|                    |                                                                                                                                                                                                                                                                                                                                                                                                                                                                                                                                                                                                                                                                                                                                                              |
|--------------------|--------------------------------------------------------------------------------------------------------------------------------------------------------------------------------------------------------------------------------------------------------------------------------------------------------------------------------------------------------------------------------------------------------------------------------------------------------------------------------------------------------------------------------------------------------------------------------------------------------------------------------------------------------------------------------------------------------------------------------------------------------------|
| Laboratory animals | B6.Cg-Lepob/J (Lepob) (Stock #000632) and B6;129S4-Pparatm1Gonz (Ppara ko) (Stock #008154) were obtained from The Jackson Laboratory (Bar Harbor, ME) and bred in the animal facility at the University of Wisconsin-Madison. Tg(CAG-Tmem135)#Aike (Tmem135 TG) mice congenic on the C57BL/6J background and mutant Tmem135 (Tmem135 FUN025/FUN025) mice were generated as previously described (PMID: 27863209, 30102730, 33064130). C57BL/6J mice served as WT controls for this study. All mice were fed a global soy protein-free extruded rodent diet (#2020X, Envigo, Madison, WI) and housed in the Medical Sciences Center Vivarium at the University of Wisconsin-Madison. Both males and females were used in this study. All numbers of mice used |
|--------------------|--------------------------------------------------------------------------------------------------------------------------------------------------------------------------------------------------------------------------------------------------------------------------------------------------------------------------------------------------------------------------------------------------------------------------------------------------------------------------------------------------------------------------------------------------------------------------------------------------------------------------------------------------------------------------------------------------------------------------------------------------------------|

in experiments are provided within the figures and their legends.

Wild animals

No wild animals were used in this study.

Field-collected samples

No field-collected samples were used in this study.

Ethics oversight

All mouse procedures were performed in accordance with the protocols approved by the Animal Care and Use Committee at the University of Wisconsin-Madison.

Note that full information on the approval of the study protocol must also be provided in the manuscript.
